# Supplementary material for: Phytoplankton community disruption caused by latest Cretaceous global warming
Source: Copernicus journal article supplement (doi:10.5194/bg-2019-231), 2019-07-30
Supplement: Supplementary file 1 [file bg-2019-231-supplement.pdf]

## Contents:

SI Text S1 & S2

SI Table S1-S6

SI Figures S1-S9

### SI Text S1 - Materials and Methods

For this study, three cores were investigated; Bass River (ODP 174AX; 39°36'42"N, 74°26'12"W (1)), drilled in 1996 by the Ocean Drilling Program and Meirs Farm (40°06'15.48"N, 74°31'37.48"W; (2)) and Fort Monmouth 3 (40°18'37.18"N, 74°02'46.25"W; (2)), drilled in 2008 by Rutgers University (K-Pg boundary drilling project (2)).

For palynological analyses, 90 oven-dried samples (~5-10 g dry mass) were analysed, 42 palynological samples from ODP 174AX Bass River, 35 palynological samples from Meirs Farm and 14 palynological samples from Fort Monmouth 3. Taxonomy used follows that of refs. (3, 4). Palynological samples were counted up to a ~250 dinocysts. Samples with a lower diversity (Shannon-H <2) were counted up to 400 dinocysts. After quantitative counts, slides were scanned for stratigraphically important taxa that were missed during quantitative counting. For benthic foraminiferal analysis, 31 samples of the Bass River core were analyzed. Samples were washed over a sieve with a mesh of 63 µm and ultrasonically cleaned. Only the size fraction of 125-630 µm was analyzed. Benthic foraminifera were identified using the taxonomy of refs (5-8).

### SI Text S2 - Age Models

The age models for the studied cores are based on a combination of dinocyst, planktic foraminiferal and nannofossil biostratigraphy. Dinocyst biostratigraphy allows an excellent age control for the Maastrichtian of the New Jersey palaeoshelf (3).

The dinocyst marker taxa *Palynodinium grillator* and *Disphaerogena carposphaeropsis* have their First Appearance Datum (FAD) at ~67 Ma (9, 10) and are representative of the uppermost Maastrichtian *P. grillator* Zone of ref (11). The FO of the marker taxon *T. pelagica*, with a FAD approximately at 66.5 Ma, allows the subdivision of the *P. grillator* Zone into the *T. magdaliium* and *T. pelagica* Subzones (11)

The age models of Meirs Farm and Fort Monmouth are based on refs (2, 3). The age model of Bass River on refs (1, 12) and this study.

**SI Figure S1** Magnitude of late Maastrichtian warming estimated for three locations at the New Jersey Shelf: Bass River, Fort Monmouth 3 and Meirs Farm. The magnitude of Deccan Traps warming was estimated by comparing the weighted mean of the TEX<sub>86</sub>-based temperatures ( $TEX_{86}^H$ , (13)) of refs. (3) and (14) in the pre-warming interval with the highest temperature in the warming interval. The gray band indicates the weighted mean of the calculated warming magnitudes.

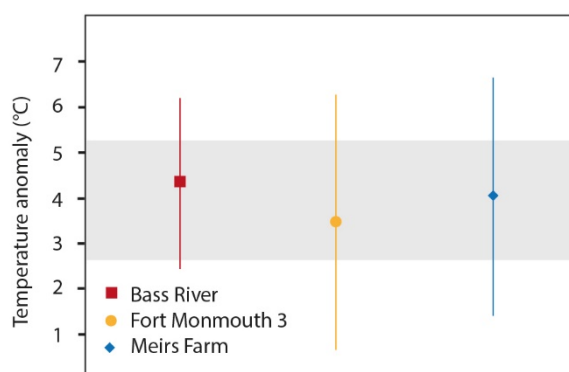

## SI Figure S2 – Photoplate of most common dinocyst taxa A

microphotographs of some selected dinocyst taxa. Scale bar represents 50 µm.

**1.** *Achomosphaera ramulifera* (Deflandre, 1937) Evitt, 1963. Sample FM3 57.0-57.1 slide 1; **2.** *Achomosphaera sagena* Davey and Williams, 1966. Sample FM3 57.0-57.1 slide 1; **3-5.** *Hafniasphaera septata* Cookson & Eisenack 1967) Hansen 1977. Sample FM3 54.4-54.5 slide 1; **6.** *Spiniferites membranaceus* (Rossignol, 1964) Sarjeant, 1970. Sample FM3 58.5-58.6 slide 1; **7-8.** *Spiniferites ramosus complex* (Ehrenberg, 1838) Mantell, 1854. Sample FM3 57.0-57.1 slide 1; **9.** *Areoligera senonensis* Lejeune-Carpentier, 1938. Sample MF1 62.5-52.6 slide 1; **10.** *Areoligera volata* Drugg, 1967. Sample FM3 54.4-54.5 slide 1; **11.** *Senoniasphaera protrusa* Clarke and Verdier, 1967, emend. Prince et al., 1999. Sample FM3 54.4-54.5 slide 1; **12.** *Senoniasphaera inornata* (Drugg 1970) Stover & Evitt 1978. Sample MF1 41.7-41.8 slide 1; **13.** *Glaphyrocysta perforata* Hultberg and Malmgren, 1985. Sample MF1 44.9-45.0 slide 1; **14.** *Glaphyrocysta semitecta* (Bujak in Bujak et al., 1980) Lentin and Williams, 1981. Sample FM3 54.4-54.5 slide 1; **15-19.** *Palynodinium grillator* Gocht, 1970. Sample FM3 54.4-54.5 slide 1; **20.** *Palynodinium cf. grillator* of Machalski et al., 2016. Sample FM3 53.4-53.5 slide 1; **21.** *Palynodinium grillator* Gocht, 1970. Sample FM3 53.4-53.5 slide 1; **22.** *Membranilarnacia? tenella* Morgenroth 1968. Sample MF1 41.7-41.8 slide 1; **23.** *Hystrichosphaeridium tubiferum* (Ehrenberg, 1838) Deflandre, 1937, emend. Davey and Williams, 1966. Sample FM3 59.5-59.6 slide 1; **24.** *Hystrichosphaeridium tubiferum* (Ehrenberg, 1838) Deflandre, 1937, emend. Davey and Williams, 1966, Sample FM3 62.0-62.1 slide 1; **25.** *Operculodinium centrocarpum* (Deflandre and Cookson, 1955) Wall, 1967. MF1 52.4-52.5 slide 1; **26.** *Achilleodinium bianii* Hultberg, 1985. Sample FM3 62.0-62.1 slide 1; **27.** *Oligosphaeridium complex* (White, 1842) Davey and Williams, 1966. Sample FM3 55.1-55.2 slide 1; **28.** *Hystrichokolpoma sp. cf. Hystrichokolpoma rigaudiae* Deflandre & Cookson 1955. Sample FM3 55.1-55.2 slide 1; **29.** *Eisenackia reticulata* (Damassa, 1979) Quattrocchio and Sarjeant, 2003. Sample MF1 47.4-47.5 slide 1; **30.** *Coronifera striolata* (Deflandre, 1937) Stover and Evitt, 1978. Sample MF1 47.4-47.5 slide 1; **31.** *Coronifera oceanica* Cookson and Eisenack, 1958, emend. May, 1980. Sample FM3 62.0-62.1 slide 1; **32.** *Diphyes colligerum* (Deflandre and Cookson, 1955) Cookson, 1965. Sample FM3 61.0-61.1 slide 1; **33.** *Impagidinium sp.* Sample FM3 59.5-59.6 slide 1; **34.** *Druggidium meerensis* Slimani and Louwye, 2011. Sample FM3 57.0-57.1 slide 1; **35.** *Druggidium discretum* Slimani and Louwye, 2011. Sample FM3 57.0-57.1 slide 1.

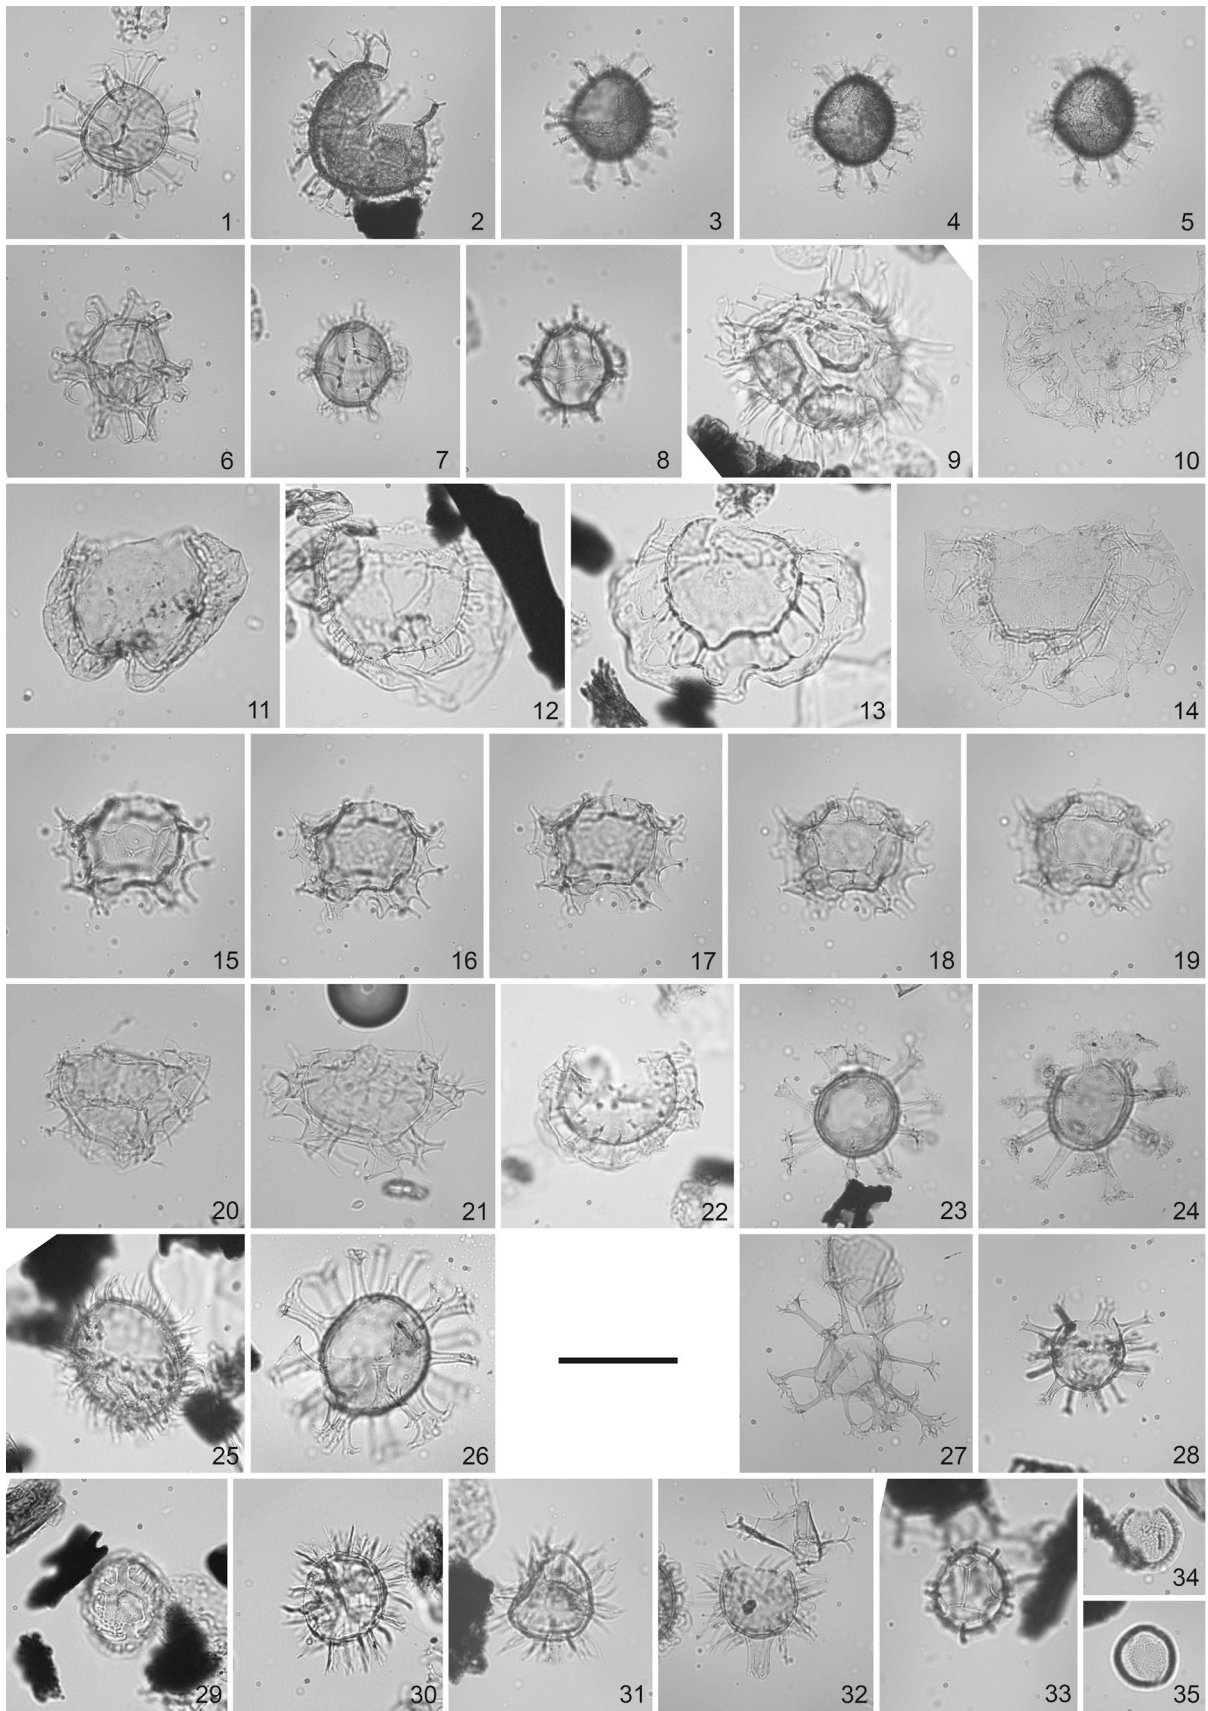

## SI Figure S3 – Photoplate of most common dinocyst taxa B

microphotographs of some selected dinocyst taxa. Scale bar represents 50 µm.

**1.** *Cribroperidinium cf. pyrum* (Drugg, 1967) Stove & Evitt, 1978. Sample FM3 56.3-56.4 slide 1; **2.** *Cribroperidinium cf. pyrum* (Drugg, 1967) Stove & Evitt, 1978. Sample FM3 57.0-57.1 slide 1; **3.** *Cribroperidinium wetzeli* (Lejeune-Carpentier, 1939) Helenes, 1984, emends. Lejeune-Carpentier, 1946, and Lejeune-Carpentier and Sarjeant, 1981. Sample FM3 52.6-52.7 slide 1; **4.** *Cribroperidinium sp. A* of Brinkhuis & Schiøler 1996. Sample MF1 47.4-47.5 slide 1; **5.** *Cordosphaeridium/Dammasadinium complex*. Sample FM3 57.0-57.1 slide 1; **6.** *Microdinium inornatum* Slimani, 1994. Sample FM3 54.4-54.5 slide 1; **7.** *Membranigonyaulax wilsonii*, Slimani 1994. Sample FM3 54.4-54.5 slide 1; **8.** *Disphaerogena carposphaeropsis* Wetzel, 1933. Sample FM3 54.4-54.5 slide 1; **9.** *Disphaerogena carposphaeropsis* Wetzel, 1933. Sample FM3 53.4-53.5 slide 1; **10.** *Disphaerogena carposphaeropsis* Wetzel, 1933. Sample FM3 52.85-52.9 slide 1; **11.** *Disphaerogena carposphaeropsis* Wetzel, 1933. Sample FM3 57.0-57.1 slide 1; **12.** *Thalassiphora pelagica* (Eisenack, 1954) Eisenack and Gocht, 1960, emend. Benedek and Gocht, 1981. Sample MF1 44.5-44.6 slide 1; **13.** *Thalassiphora patula* (Williams and Downie, 1966) Stover and Evitt, 1978. Sample FM3 54.4-54.5 slide 1; **14.** *Lanternosphaeridium lanosum* Morgenroth, 1966. Sample FM3 57.0-57.1 slide 1; **15.** *Lanternosphaeridium reinhardtii* Habib in Moshkovitz and Habib, 1993. Sample FM3 56.3-56.4 slide 1; **16.** *Tanyosphaeridium sp.* Sample FM3 57.0-57.1 slide 1; **17.** *Tanyosphaeridium xanthiopyxides* (Wetzel, 1933) Stover and Evitt, 1978, emends. Morgenroth, 1968, and Sarjeant, 1985. Sample FM3 55.1-55.2 slide 1; **18.** *Xenikoon sp. A* of Foucher & Robaszynski, 1977. Sample FM3 57.0-57.1 slide 1; **19.** *Dinogymnium acuminatum* Evitt et al., 1967. Sample MF1 47.4-47.5 slide 1; **20.** *Manumiella seelandica* (Lange, 1969) Bujak and Davies, 1983, emend. Firth, 1987. Sample FM3 52.85-52.9 slide 1; **21.** *Cerodinium speciosum* (Alberti, 1959) Lentin and Williams, 1987. Sample FM3 56.3-56.4 slide 1; **22.** *Cerodinium diebelii* (Alberti, 1959) Lentin and Williams, 1987. Sample FM3 52.85-52.9 slide 1; **23.** *Phelodinium pentagonale* (Corradini, 1973) Stover and Evitt, 1978. Sample FM3 56.3-56.4 slide 1; **24.** *Palaeoperidinium pyrophorum* (Ehrenberg, 1838) Sarjeant, 1967, emends. Sarjeant, 1967, Gocht and Netzel, 1976 and Evitt et al., 1998. Sample MF1 57.4-57.5 slide 1; **25.** *Deflandrea galeata* (Lejeune-Carpentier, 1942) Lentin and Williams, 1973, emend. Lejeune-Carpentier and Sarjeant, 1981. Sample FM3 54.4-54.5 slide 1; **26.** *Chatangiella victoriensis* (Cookson and Manum, 1964) Lentin and Williams, 1976, emend. Lebedeva in Ilyina et al., 1994. Sample MF1 71.7-71.8 slide 1; **27.** *Chatangiella sp. A* of Schiøler & Wilson, 1993. Sample MF1 67.4-67.5 slide 1; **28.** *Palaeocystodinium golzowense* Alberti, 1961. Sample MF1 57.4-57.5 slide 1; **29.** *Phelodinium magnificum* (Stanley, 1965) Stover and Evitt, 1978. Sample MF1 52.4-52.5 slide 1; **30.** *Senegalinium bicavatum* Jain and Millepied, 1973. Sample FM3 54.4-54.4 slide 1; **31.** *Pierceites pentagonus* (May, 1980) Habib and Drugg, 1987. Sample FM3 55.1-55.2 slide 1; **32.** *Diconodinium wilsonii* Aurisano, 1984. Sample FM3 59.5-59.6 slide 1; **33.** *Magallanesium densispinatum* (Stanley, 1965) Quattrocchio and Sarjeant,

2003. Sample FM3 61.0-61.1 slide 1; **34.** *Trithyrodinium evittii* Drugg, 1967. Sample MF1 44.9-45.0 slide 1.

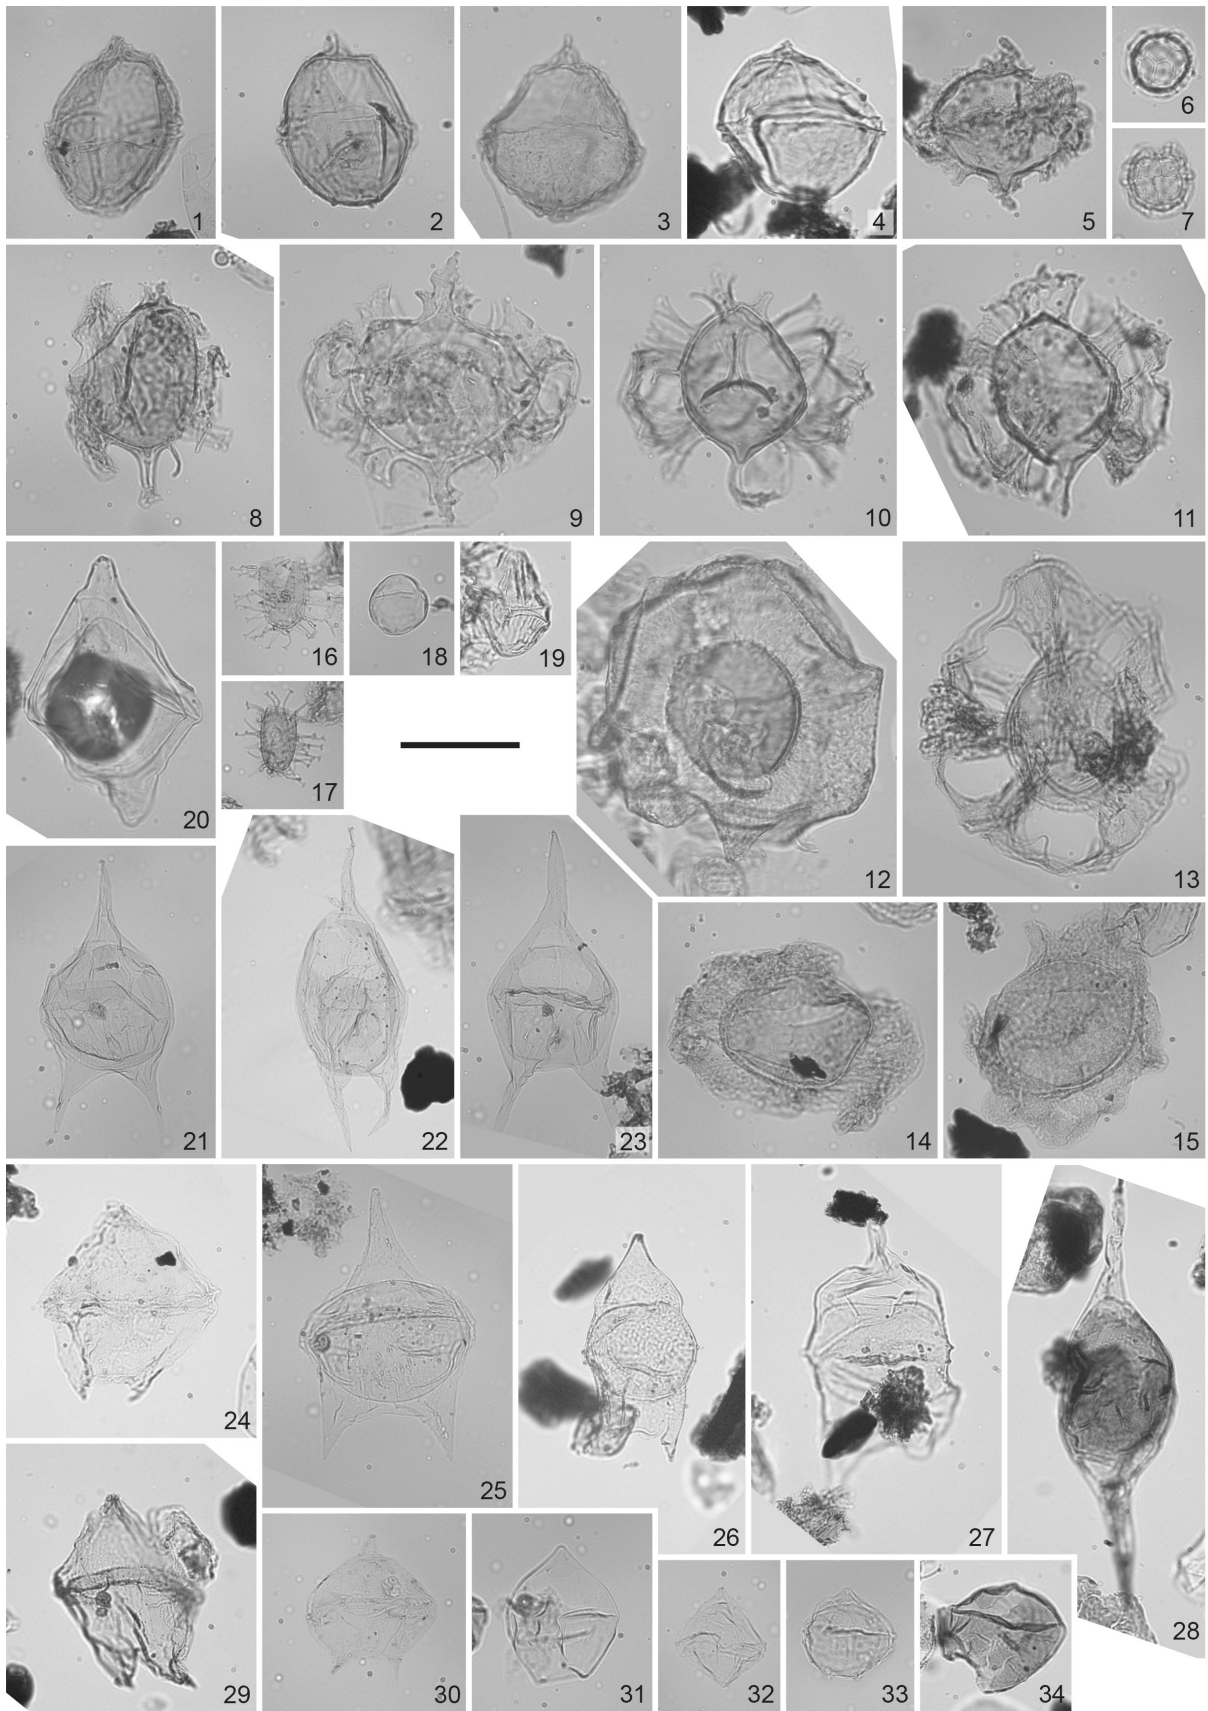

## SI Figure S4 – Photoplate of other common palynomorphs

microphotographs of the most common non-dinocyst palynomorph taxa. Scale bar represents 50  $\mu\text{m}$ .

**1.** *Palambages trilicius* Firth, 1993. Sample FM3 59.5-59.6 slide 1; **2.** acritarch Form D of Marheinecke 1986. Sample FM3 54.4-54.5 slide 1; **3.** *Micrhystridium fragile* Deflandre 1947. Sample FM3 54.4-54.5 slide 1; **4.** ?*Yolkinigymnium* sp. Sample FM3 55.1-55.2 slide 1; **5.** *Fromea amphora* Cookson & Eisenack 1958. Sample FM3 55.1-55.2 slide 1; **6.** *Pterospermella* sp. Sample FM3 53.4-53.5 slide 1; **7.** *Paralecaniella indentata* (Deflandre and Cookson, 1955) Cookson and Eisenack, 1970, emend. Elsik, 1977. Sample MF1 47.4-47.5 slide 1; **8.** *Paralecaniella indentata* (Deflandre and Cookson, 1955) Cookson and Eisenack, 1970, emend. Elsik, 1977. Sample FM3 57.0-57.1 slide 1; **10-15.** gymnosperm pollen grains; **16-18.** angiosperm pollen grains; **19-24.** trilete spores.

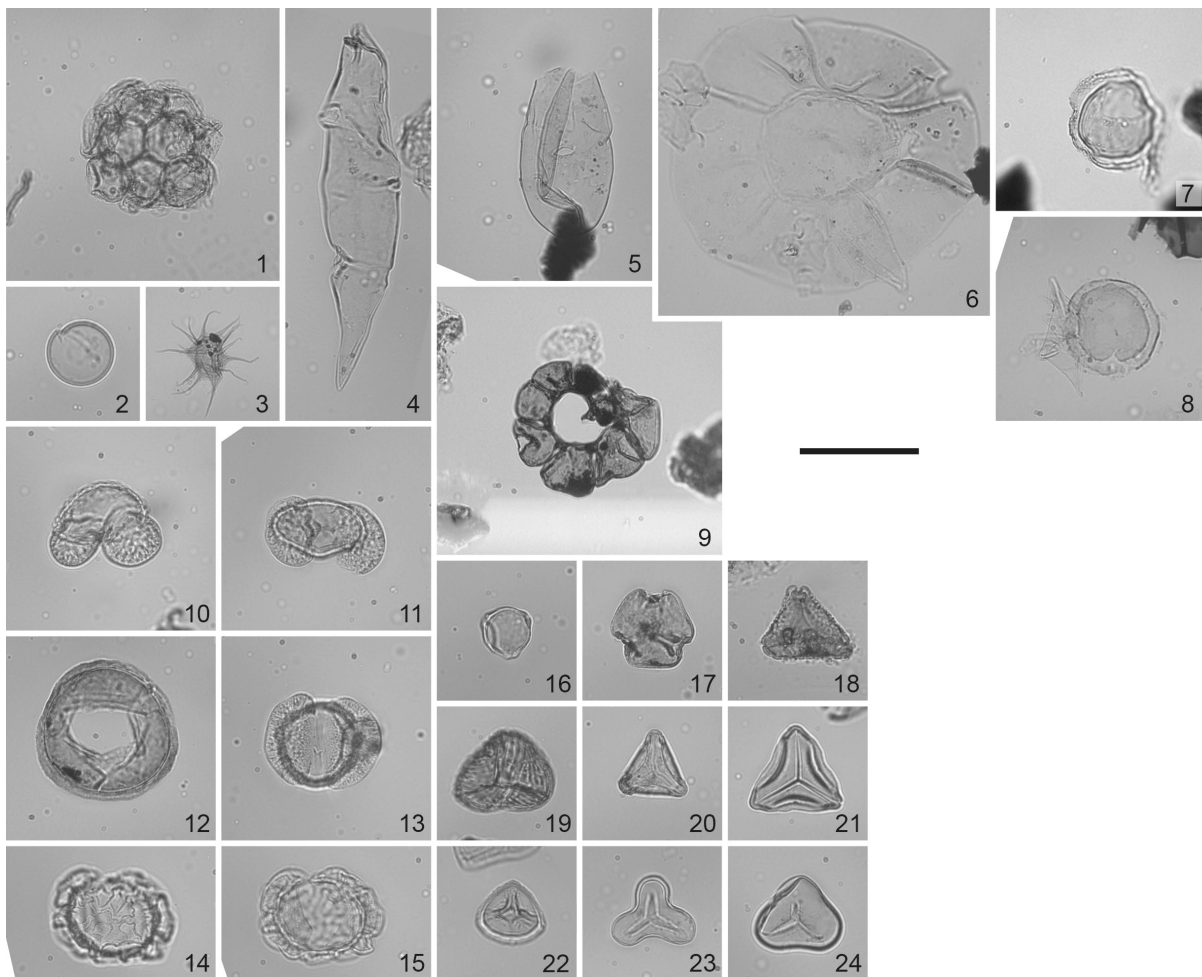



**SI Figure S5 – Photoplate of near-monospecific aggregates of *Palynodinium* *grallator*.**

microphotographs of near-monospecific aggregates of *Palynodinium* *grallator*. Scale bars represent 200  $\mu\text{m}$ . A-E: sample BR 1264.85-1264.95 ft slide 1; F-L: sample BR 1262.50-1262.55 ft slide 1.

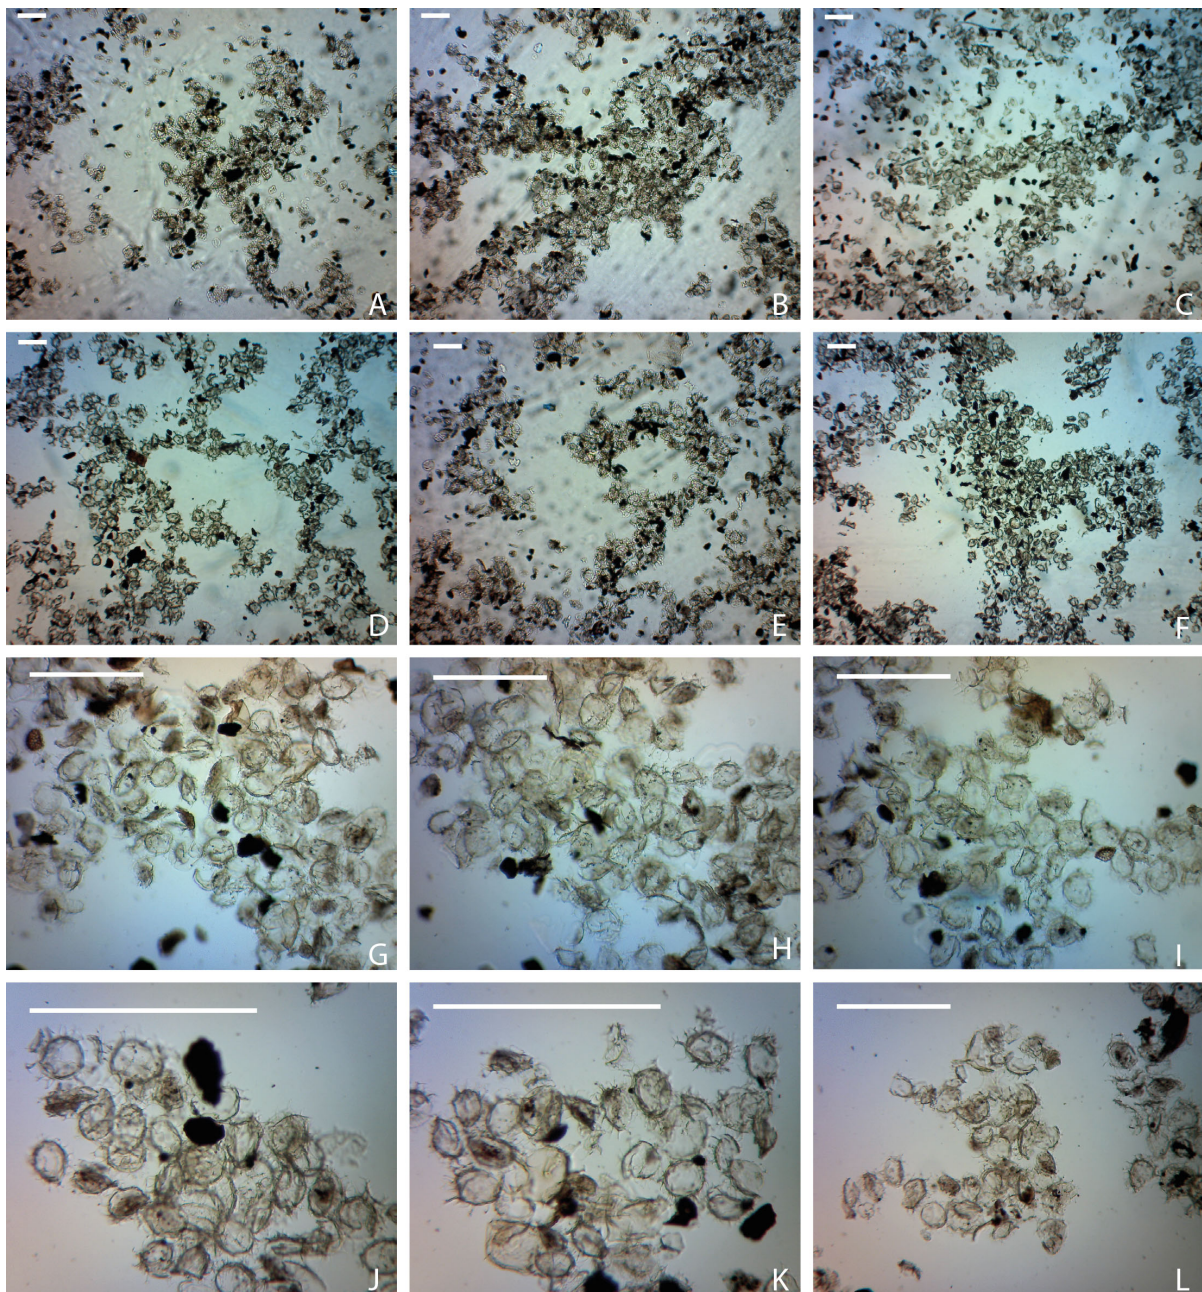

## **SI Figure S6 – Photoplate with most common benthic foraminiferal taxa**

SEM images of most common benthic foraminifera found in this study.

**1.** *Verneuillina* sp.; **2.** *Anomalinoides midwayensis* (Plummer); **3.** *Anomalinoides* sp.; **4.** *Eponides plummerae* (Cushman); **5.** *Cibicidoides* sp.; **6.** *Cibicidoides succedens* (Brotzen); **7.** *Gyroidinoides depressa* (Alth); **8.** *Gyroidinoides imitata* (Olsson); **9.** *Bulimina arkadelphia* (Cushman and Parker); **10.** *Pulsiphonina prima* (Plummer); **11.** *Praebulimina carseyae* (Plummer); **12.** *Osangularia plummerae* (Brotzen); **13.** *Coryphostoma incrassata* (Reuss); **14.** *Coryphostoma plaitum* (Carsey); **15.** *Dorothia* sp.; **16.** *Gaudryina monmouthensis* (Olsson); **17.** *Clavulinoides trilateral* (Cushman); **18.** *Pseudouvigerina seligi* (Cushman).

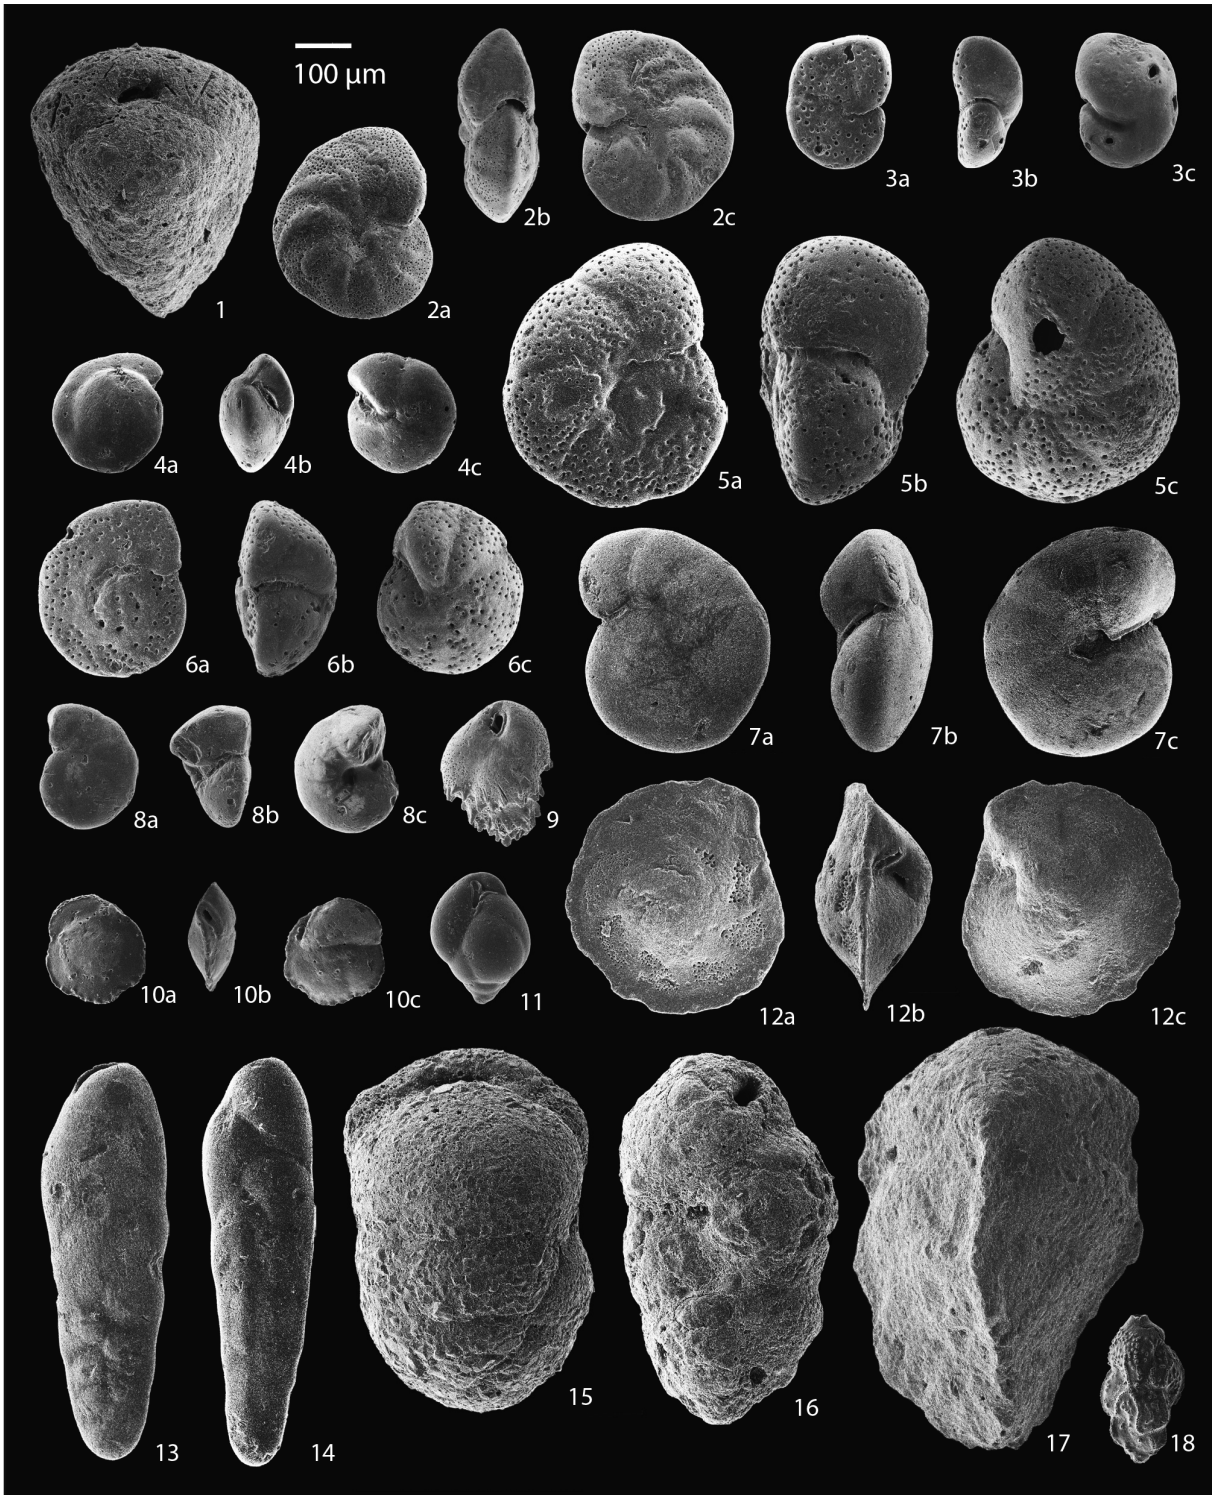

**SI Figure S7 – Benthic foraminifera per gram at Bass River.** The red zone tentatively indicates the late Maastrichtian warming interval warming interval.

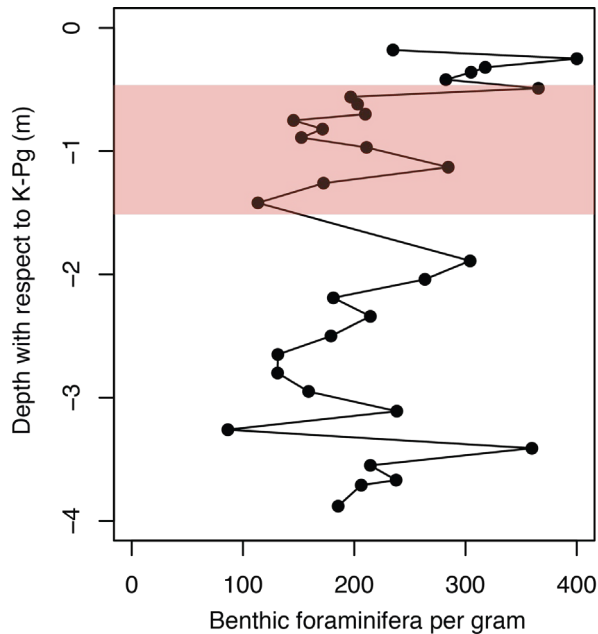

## References

1. Miller KG, et al. (1998) Bass river site. *Proc Ocean Drill Program, Initial Reports* 174AX:5–43.
2. Miller KG, et al. (2010) Relationship between mass extinction and iridium across the Cretaceous-Paleogene boundary in New Jersey. *Geology* 38(10):867–870.
3. Vellekoop J, et al. (2016) Evidence for Cretaceous-Paleogene boundary bolide “impact winter” conditions from New Jersey, USA. *Geology* 44(8):619–622.
4. Fensome RA, MacRae RA, Williams GL (2008) DINOFLAJ2, Version 1. *Am Assoc Stratigr Palynol*. Available at: [http://dinoflaj.smu.ca/wiki/Main\\_Page](http://dinoflaj.smu.ca/wiki/Main_Page).
5. Cushman JA (1946) *Upper Cretaceous foraminifera of the Gulf Region of the United States and adjacent areas*. Geological Survey Professional Paper 206.
6. Cushman JA (1951) *Paleocene foraminifera of the Gulf Coastal Region of the United States and adjacent areas*. Geological Survey Professional Paper 232.
7. Kellough GR (1965) Paleocology of the foraminiferida of the Wills Point Formation (Midway Group) in Northeast Texas. *Trans Gulf Coast Assoc Geol Soc* 15:73–153.
8. Olsson RK (1960) Foraminifera of latest Cretaceous and earliest Tertiary age in the New

Jersey coastal plain. *J Paleontol* 34(1):1–58.

9. De Gracianski PC, Hardenbol J, Jacquin T, Vail PR (1998) Mesozoic-Cenozoic sequence stratigraphy of European basins. *Soc Econ Paleontol Mineral Spec Publ SEPM* 60.
10. Williams GL, Brinkhuis H, Pearce MA, Fensome RA, Weegink JW (2004) Southern Ocean and global dinoflagellate cyst events compared: index events for the Late Cretaceous–Neogene. *Proceedings of the Ocean Drilling Program, Scientific Results*, eds Exon NF, Kennett JP, Malone MJ, pp 1–98.
11. Hansen JM (1977) Dinoflagellate stratigraphy and echinoid distribution in Upper Maastrichtian and Danian deposits from Denmark. *Bull Geol Soc Denmark* 26:1–26.
12. Esmeray-Senlet S, et al. (2015) Evidence for reduced export productivity following the Cretaceous/Paleogene mass extinction. *Paleoceanography* 30:1–21.
13. Kim JH, et al. (2010) New indices and calibrations derived from the distribution of crenarchaeal isoprenoid tetraether lipids: Implications for past sea surface temperature reconstructions. *Geochim Cosmochim Acta* 74(16):4639–4654.
14. Woelders L, et al. (2018) Robust multi-proxy data integration, using late Cretaceous paleotemperature records as a case study. *Earth Planet Sci Lett* 500:215–224.

**SI Table S1 – Bass River dinoflagellate record (relative abundances)**

| Leg   | Site       | Core | Interval (ft.)    | Average depth (ft.) | Depth (m) | Distance from KTB (m) | Weight (g) | Achilleodinium biannii | Achomospaera ramulifera | Achomospaera sagena | Adnatosphaeridium buccinum | Alisocysta circumtabulata | Alisocysta reticulata | Alisogymnium sp. |
|-------|------------|------|-------------------|---------------------|-----------|-----------------------|------------|------------------------|-------------------------|---------------------|----------------------------|---------------------------|-----------------------|------------------|
| 174AX | Bass River | 272  | 1256.75 - 1256.8  | 1256,775            | 383,07    | 1,05 P1c              | 9,5232     | 0,0                    | 7,5                     | 2,0                 | 0,0                        | 0,0                       | 0,0                   | 0,0              |
| 174AX | Bass River | 273  | 1257.5 - 1257.6   | 1257,55             | 383,30    | 0,82 P1c              | 9,8043     | 1,3                    | 2,7                     | 1,8                 | 0,0                        | 0,4                       | 0,0                   | 0,0              |
| 174AX | Bass River | 273  | 1258.05 - 1258.15 | 1258,1              | 383,47    | 0,65 P1c              | 9,7849     | 0,0                    | 2,0                     | 0,6                 | 0,0                        | 0,4                       | 0,0                   | 0,0              |
| 174AX | Bass River | 273  | 1258.2 - 1258.25  | 1258,225            | 383,51    | 0,61 P1c              | 8,1751     | 0,0                    | 1,2                     | 0,0                 | 0,0                        | 0,0                       | 0,0                   | 0,0              |
| 174AX | Bass River | 273  | 1258.5 - 1258.6   | 1258,55             | 383,61    | 0,51 P1c              | 10,0052    | 0,0                    | 4,3                     | 1,2                 | 0,4                        | 0,0                       | 0,0                   | 0,0              |
| 174AX | Bass River | 273  | 1258.75 - 1258.8  | 1258,775            | 383,67    | 0,45 P1a              | 6,4283     | 0,0                    | 4,7                     | 1,1                 | 0,0                        | 0,0                       | 0,4                   | 0,0              |
| 174AX | Bass River | 273  | 1259.05 - 1259.15 | 1259,1              | 383,77    | 0,35 P1a              | 9,7235     | 0,0                    | 6,9                     | 0,4                 | 0,0                        | 0,4                       | 0,0                   | 0,0              |
| 174AX | Bass River | 273  | 1259.35 - 1259.4  | 1259,375            | 383,86    | 0,26 P1a              | 5,5138     | 0,4                    | 9,8                     | 1,2                 | 0,0                        | 0,0                       | 0,0                   | 0,0              |
| 174AX | Bass River | 274  | 1260.8 - 1260.85  | 1260,825            | 384,30    | -0,18                 | 4,1164     | 0,0                    | 10,9                    | 0,0                 | 0,0                        | 0,0                       | 0,0                   | 0,0              |
| 174AX | Bass River | 274  | 1261.0 - 1261.1   | 1261,05             | 384,37    | -0,25                 | 9,5876     | 1,4                    | 3,1                     | 0,3                 | 0,0                        | 0,0                       | 0,0                   | 0,0              |
| 174AX | Bass River | 274  | 1261.25 - 1261.3  | 1261,275            | 384,44    | -0,32                 | 5,6967     | 0,6                    | 9,7                     | 0,4                 | 0,0                        | 0,0                       | 0,0                   | 0,0              |
| 174AX | Bass River | 274  | 1261.4 - 1261.45  | 1261,425            | 384,48    | -0,36                 | 4,0063     | 1,2                    | 6,4                     | 0,6                 | 0,0                        | 0,0                       | 0,0                   | 0,0              |
| 174AX | Bass River | 274  | 1261,6 - 1261,65  | 1261,625            | 384,54    | -0,42                 | 4,8018     | 1,6                    | 5,2                     | 1,6                 | 0,0                        | 0,0                       | 0,0                   | 0,0              |
| 174AX | Bass River | 274  | 1261.8 - 1261.9   | 1261,85             | 384,61    | -0,49                 | 9,5338     | 0,3                    | 1,2                     | 0,3                 | 0,0                        | 0,0                       | 0,0                   | 0,0              |
| 174AX | Bass River | 274  | 1262.05 - 1262.1  | 1262,075            | 384,68    | -0,56                 | 6,6641     | 0,6                    | 0,3                     | 0,5                 | 0,0                        | 0,0                       | 0,0                   | 0,0              |
| 174AX | Bass River | 274  | 1262.25 - 1262.3  | 1262,275            | 384,74    | -0,62                 | 4,7633     | 0,0                    | 4,1                     | 0,0                 | 0,0                        | 0,0                       | 0,0                   | 0,0              |
| 174AX | Bass River | 274  | 1262.5 - 1262.55  | 1262,525            | 384,82    | -0,70                 | 9,1742     | 0,0                    | 0,6                     | 0,1                 | 0,0                        | 0,0                       | 0,0                   | 0,0              |
| 174AX | Bass River | 274  | 1262.65 - 1262.75 | 1262,7              | 384,87    | -0,75                 | 9,6295     | 0,0                    | 1,3                     | 0,0                 | 0,0                        | 0,0                       | 0,0                   | 0,0              |
| 174AX | Bass River | 274  | 1262.9 - 1262.95  | 1262,925            | 384,94    | -0,82                 | 7,5008     | 0,9                    | 1,3                     | 0,3                 | 0,0                        | 0,0                       | 0,0                   | 0,0              |
| 174AX | Bass River | 274  | 1263.1 - 1263.2   | 1263,15             | 385,01    | -0,89                 | 9,5598     | 0,3                    | 1,9                     | 0,6                 | 0,0                        | 0,0                       | 0,0                   | 0,3              |
| 174AX | Bass River | 274  | 1263.4 - 1263.45  | 1263,425            | 385,09    | -0,97                 | 4,6097     | 0,3                    | 0,3                     | 0,3                 | 0,0                        | 0,0                       | 0,0                   | 0,0              |
| 174AX | Bass River | 274  | 1263.9 - 1264.0   | 1263,95             | 385,25    | -1,13                 | 9,6326     | 0,5                    | 0,7                     | 0,0                 | 0,0                        | 0,0                       | 0,0                   | 0,0              |
| 174AX | Bass River | 274  | 1264.35 - 1264.4  | 1264,375            | 385,38    | -1,26                 | 9,5783     | 0,5                    | 1,8                     | 0,3                 | 0,0                        | 0,0                       | 0,0                   | 0,0              |
| 174AX | Bass River | 274  | 1264.85 - 1264.95 | 1264,9              | 385,54    | -1,42                 | 9,5232     | 0,0                    | 0,5                     | 1,2                 | 0,0                        | 0,0                       | 0,0                   | 0,0              |
| 174AX | Bass River | 275  | 1266.4 - 1266.45  | 1266,425            | 386,01    | -1,89                 | 4,9258     | 0,0                    | 5,4                     | 3,6                 | 0,0                        | 0,0                       | 0,0                   | 0,0              |
| 174AX | Bass River | 275  | 1266.9 - 1266.95  | 1266,925            | 386,16    | -2,04                 | 4,9019     | 0,4                    | 5,3                     | 1,5                 | 0,0                        | 0,0                       | 0,0                   | 0,0              |
| 174AX | Bass River | 275  | 1267.4 - 1267.45  | 1267,425            | 386,31    | -2,19                 | 5,1683     | 0,9                    | 14,7                    | 2,1                 | 0,0                        | 0,0                       | 0,0                   | 0,0              |
| 174AX | Bass River | 275  | 1267.9 - 1267.95  | 1267,925            | 386,46    | -2,34                 | 5,6158     | 0,6                    | 9,9                     | 2,3                 | 0,0                        | 0,0                       | 0,0                   | 0,0              |
| 174AX | Bass River | 275  | 1268.4 - 1268.45  | 1268,425            | 386,62    | -2,50                 | 4,8412     | 0,0                    | 5,5                     | 2,3                 | 0,0                        | 0,0                       | 0,0                   | 0,5              |
| 174AX | Bass River | 275  | 1268.9 - 1268.95  | 1268,925            | 386,77    | -2,65                 | 5,2615     | 0,9                    | 7,5                     | 0,9                 | 0,0                        | 0,4                       | 0,0                   | 0,0              |
| 174AX | Bass River | 275  | 1269.4 - 1269.45  | 1269,425            | 386,92    | -2,80                 | 9,1674     | 0,4                    | 4,8                     | 1,5                 | 0,0                        | 0,0                       | 0,0                   | 0,0              |
| 174AX | Bass River | 275  | 1269.9 - 1269.95  | 1269,925            | 387,07    | -2,95                 | 4,8022     | 1,8                    | 10,0                    | 0,7                 | 0,0                        | 0,0                       | 0,0                   | 0,0              |
| 174AX | Bass River | 275  | 1270.4 - 1270.45  | 1270,425            | 387,23    | -3,11                 | 4,1378     | 0,5                    | 8,6                     | 0,0                 | 0,0                        | 0,0                       | 0,0                   | 0,0              |
| 174AX | Bass River | 275  | 1270.9 - 1270.95  | 1270,925            | 387,38    | -3,26                 | 6,2629     | 0,9                    | 10,7                    | 1,1                 | 0,0                        | 0,0                       | 0,0                   | 0,4              |
| 174AX | Bass River | 276  | 1271.4 - 1271.45  | 1271,425            | 387,53    | -3,41                 | 5,9088     | 0,4                    | 12,9                    | 0,6                 | 0,0                        | 0,0                       | 0,0                   | 0,0              |
| 174AX | Bass River | 276  | 1271.85 - 1271.9  | 1271,875            | 387,67    | -3,55                 | 7,0947     | 1,2                    | 14,5                    | 1,0                 | 0,0                        | 0,4                       | 0,0                   | 0,0              |
| 174AX | Bass River | 276  | 1272.25 - 1272.3  | 1272,275            | 387,79    | -3,67                 | 4,1112     | 0,0                    | 8,1                     | 0,9                 | 0,0                        | 0,0                       | 0,0                   | 0,4              |
| 174AX | Bass River | 276  | 1272.4 - 1272.45  | 1272,425            | 387,84    | -3,72                 | 5,9453     | 2,2                    | 8,7                     | 0,9                 | 0,0                        | 0,0                       | 0,0                   | 0,0              |
| 174AX | Bass River | 276  | 1272.9 - 1272.95  | 1272,925            | 387,99    | -3,87                 | 3,4457     | 0,9                    | 16,3                    | 0,4                 | 0,0                        | 0,0                       | 0,0                   | 0,0              |
| 174AX | Bass River | 276  | 1272.9 - 1273.0   | 1272,95             | 388,00    | -3,88                 | 9,6686     | 0,0                    | 6,0                     | 3,5                 | 0,0                        | 0,0                       | 0,0                   | 0,0              |



|      |                                        |            |                                                        |                          |                            |                            |                                |                    |                        |                       |                 |                 |                    |                                |                                             |                      |                        |                        |                          |                    |                         |
|------|----------------------------------------|------------|--------------------------------------------------------|--------------------------|----------------------------|----------------------------|--------------------------------|--------------------|------------------------|-----------------------|-----------------|-----------------|--------------------|--------------------------------|---------------------------------------------|----------------------|------------------------|------------------------|--------------------------|--------------------|-------------------------|
|      | Cordosphaeridium/Damassadinium complex |            |                                                        |                          |                            |                            |                                |                    |                        |                       |                 |                 |                    |                                |                                             |                      |                        |                        |                          |                    |                         |
|      | Coronifera                             | Coronifera | Cribroperidinium sp. A of Brinkhuis and Schioler, 1996 | Cribroperidinium wetzeli | Cyclonephellium distinctum | Damassadinium californicum | Damassadinium cf. californicum | Deflandrea galeata | Deflandrea tuberculata | Diconodinium wilsonii | Dinocysts sp. 1 | Dinogymnium sp. | Diphyes colligerum | Disphaerogena carposphaeropsis | Disphaerogena carposphaeropsis var. cornuta | Druggidium discretum | Druggidium meerenensis | Exosphaeridium bifidum | Fibradinium annetorpense | Fibrocysta axialis | Fibrocysta spp. Undiff. |
| 2,2  | 0,0                                    | 0,0        | 0,0                                                    | 0,0                      | 0,0                        | 0,2                        | 0,0                            | 3,1                | 0,0                    | 0,0                   | 0,0             | 0,0             | 0,0                | 0,0                            | 0,0                                         | 0,0                  | 0,0                    | 0,4                    | 1,2                      | 0,4                | 0,8                     |
| 0,0  | 0,0                                    | 0,0        | 0,9                                                    | 1,3                      | 0,0                        | 0,9                        | 0,0                            | 0,4                | 0,0                    | 0,0                   | 0,0             | 0,0             | 0,4                | 0,0                            | 0,0                                         | 0,0                  | 1,8                    | 0,0                    | 2,2                      | 0,4                | 1,1                     |
| 5,4  | 0,0                                    | 0,4        | 0,4                                                    | 0,0                      | 0,0                        | 13,9                       | 0,0                            | 0,6                | 0,0                    | 0,0                   | 0,0             | 0,0             | 0,0                | 0,0                            | 1,0                                         | 0,0                  | 0,0                    | 0,0                    | 1,0                      | 0,2                | 0,6                     |
| 1,5  | 0,0                                    | 0,0        | 0,0                                                    | 1,2                      | 0,0                        | 1,2                        | 0,0                            | 0,0                | 0,0                    | 0,0                   | 0,0             | 0,0             | 0,0                | 0,0                            | 0,0                                         | 0,0                  | 0,0                    | 0,0                    | 0,4                      | 0,0                | 0,0                     |
| 0,4  | 0,0                                    | 0,4        | 0,4                                                    | 0,4                      | 0,0                        | 2,3                        | 0,0                            | 0,8                | 0,0                    | 0,4                   | 0,0             | 0,0             | 0,0                | 0,0                            | 0,4                                         | 0,0                  | 1,2                    | 0,0                    | 0,4                      | 0,0                | 0,4                     |
| 3,0  | 0,0                                    | 0,8        | 0,8                                                    | 0,4                      | 0,0                        | 2,8                        | 0,0                            | 1,3                | 0,0                    | 0,0                   | 0,0             | 0,0             | 0,0                | 0,0                            | 0,0                                         | 0,4                  | 0,4                    | 0,0                    | 1,7                      | 0,8                | 0,4                     |
| 0,4  | 0,0                                    | 0,0        | 0,8                                                    | 0,0                      | 0,0                        | *                          | *                              | 0,8                | 0,0                    | 0,0                   | 0,0             | 0,0             | 0,0                | 0,0                            | 0,0                                         | 0,0                  | 0,0                    | 0,0                    | 3,7                      | 0,4                | 0,4                     |
| 0,0  | 0,0                                    | 0,0        | 0,0                                                    | 0,0                      | 0,0                        | 0,0                        | 0,0                            | 0,4                | 0,0                    | 0,0                   | 0,0             | 0,0             | 0,0                | *                              | 0,0                                         | 0,0                  | 0,4                    | 0,0                    | 0,8                      | 0,4                | 0,4                     |
| 0,4  | 0,0                                    | 0,4        | 0,4                                                    | 0,4                      | 0,0                        | 0,0                        | 0,0                            | 1,1                | 0,9                    | 0,4                   | 0,0             | 0,0             | 0,0                | 0,0                            | 6,0                                         | 0,0                  | 0,0                    | 0,0                    | 1,3                      | 0,7                | 0,7                     |
| 0,0  | 0,0                                    | 1,4        | 0,3                                                    | 0,0                      | 0,0                        | 0,0                        | 0,0                            | 0,7                | 0,0                    | 0,0                   | 0,0             | 0,0             | 0,0                | 0,3                            | 13,6                                        | 0,0                  | 0,0                    | 0,3                    | 0,0                      | 0,7                | 0,3                     |
| 0,2  | 0,0                                    | 1,3        | 0,8                                                    | 0,0                      | 0,0                        | 0,0                        | 0,0                            | 0,8                | 0,0                    | 0,0                   | 0,0             | 0,0             | 0,8                | 1,1                            | 9,9                                         | 0,0                  | 0,0                    | 0,0                    | 0,0                      | 0,2                | 0,0                     |
| 0,8  | 0,0                                    | 0,0        | 0,4                                                    | 0,6                      | 0,0                        | 0,0                        | 0,0                            | 0,2                | 0,0                    | 0,0                   | 0,0             | 0,0             | 0,4                | 0,0                            | 24,0                                        | 0,0                  | 0,0                    | 0,0                    | 0,0                      | 0,0                | 0,2                     |
| 0,0  | 0,0                                    | 0,0        | 0,0                                                    | 0,0                      | 0,0                        | 0,0                        | 0,0                            | 0,3                | 0,0                    | 0,0                   | 0,0             | 0,0             | 0,0                | 0,0                            | 18,6                                        | 0,0                  | 0,0                    | 0,0                    | 0,0                      | 1,0                | 0,3                     |
| 0,0  | 0,0                                    | 0,0        | 0,9                                                    | 0,0                      | 0,0                        | 0,0                        | 0,0                            | 0,3                | 0,0                    | 0,0                   | 0,0             | 0,0             | 0,0                | 0,0                            | 12,7                                        | 0,0                  | 0,0                    | 0,0                    | 0,0                      | 0,0                | 0,2                     |
| 0,2  | 0,0                                    | 0,2        | 0,2                                                    | 0,0                      | 0,0                        | 0,0                        | 0,0                            | 0,0                | 0,0                    | 0,0                   | 0,0             | 0,0             | 0,0                | 0,0                            | 9,3                                         | 0,0                  | 0,0                    | 0,0                    | 0,0                      | 0,0                | 0,0                     |
| 0,3  | 0,0                                    | 0,0        | 0,4                                                    | 0,0                      | 0,0                        | 0,0                        | 0,0                            | 0,8                | 0,0                    | 0,0                   | 0,0             | 0,0             | 0,0                | 0,0                            | 15,1                                        | 0,0                  | 0,0                    | 0,0                    | 0,0                      | 0,0                | 0,3                     |
| 0,2  | 0,0                                    | 0,0        | 0,2                                                    | 0,0                      | 0,0                        | 0,0                        | 0,0                            | 0,0                | 0,0                    | 0,0                   | 0,0             | 0,0             | 0,0                | 0,0                            | 13,5                                        | 0,0                  | 0,0                    | 0,0                    | 0,0                      | 0,2                | 0,0                     |
| 0,6  | 0,0                                    | 0,0        | 0,6                                                    | 0,6                      | 0,0                        | 0,0                        | 0,0                            | 0,3                | 0,0                    | 0,0                   | 0,0             | 0,0             | 0,0                | 0,0                            | 18,7                                        | 0,0                  | 0,0                    | 0,0                    | 0,0                      | 0,6                | 0,0                     |
| 0,0  | 0,0                                    | 0,0        | 0,5                                                    | 0,0                      | 0,0                        | 0,0                        | 0,0                            | 0,3                | 0,0                    | 0,0                   | 0,0             | 0,0             | 0,0                | 1,0                            | 29,3                                        | 0,0                  | 0,0                    | 0,0                    | 0,0                      | 0,0                | 0,0                     |
| 0,3  | 0,0                                    | 0,0        | 0,0                                                    | 0,0                      | 0,0                        | 0,0                        | 0,0                            | 0,3                | 0,0                    | 0,0                   | 0,0             | 0,0             | 0,0                | 0,3                            | 37,1                                        | 0,0                  | 0,0                    | 0,0                    | 0,0                      | 0,5                | 0,0                     |
| 0,1  | 0,0                                    | 0,0        | 0,5                                                    | 0,0                      | 0,0                        | 0,0                        | 0,0                            | 0,3                | 0,0                    | 0,0                   | 0,0             | 0,0             | 0,0                | 0,5                            | 30,4                                        | 0,0                  | 0,0                    | 0,0                    | 0,0                      | 0,0                | 0,0                     |
| 0,5  | 0,0                                    | 0,0        | 0,8                                                    | 0,3                      | 0,0                        | 0,0                        | 0,0                            | 0,4                | 0,0                    | 0,0                   | 0,0             | 0,0             | 0,0                | *                              | 40,4                                        | 0,0                  | 0,0                    | 0,0                    | 0,0                      | 0,0                | 0,0                     |
| 11,7 | 0,0                                    | 0,0        | 0,5                                                    | 0,3                      | 0,0                        | 0,0                        | 0,0                            | 0,5                | 0,3                    | 0,0                   | 0,0             | 0,0             | 0,0                | 2,5                            | 53,1                                        | 0,0                  | 0,0                    | 0,0                    | 0,0                      | 0,3                | 0,0                     |
| 0,2  | 0,0                                    | 0,0        | 0,0                                                    | 0,0                      | 0,0                        | 0,0                        | 0,0                            | 0,0                | 0,0                    | 0,0                   | 0,0             | 0,0             | 0,0                | 0,0                            | 11,3                                        | 0,0                  | 0,0                    | 0,0                    | 0,0                      | 0,2                | 0,5                     |
| 0,0  | 0,0                                    | 0,4        | 0,4                                                    | 1,8                      | 0,0                        | 0,0                        | 0,0                            | 0,8                | 0,0                    | 0,0                   | 0,0             | *               | 0,4                | 1,6                            | 0,0                                         | 0,8                  | 0,4                    | 0,0                    | 0,0                      | 0,0                | 0,0                     |
| 0,0  | 0,0                                    | 0,4        | 0,0                                                    | 1,7                      | 0,0                        | 0,0                        | 0,0                            | 2,4                | 0,0                    | 0,0                   | 0,0             | 0,0             | 0,0                | 0,6                            | 0,0                                         | 0,0                  | 0,0                    | 0,0                    | 0,0                      | 1,3                | 0,0                     |
| 0,0  | 0,0                                    | 1,1        | 2,8                                                    | 0,0                      | 0,0                        | 0,0                        | 0,0                            | 1,1                | 0,4                    | 0,0                   | 0,0             | 0,0             | 0,0                | 0,0                            | 0,0                                         | 0,0                  | 0,4                    | 0,0                    | 0,0                      | 0,4                | 0,0                     |
| 0,0  | 0,0                                    | 0,4        | 0,4                                                    | 2,7                      | 0,0                        | 0,0                        | 0,0                            | 1,5                | 0,6                    | 0,0                   | 0,0             | 0,0             | 0,0                | 0,4                            | 0,0                                         | 0,4                  | 0,0                    | 0,0                    | 0,0                      | 0,0                | 0,0                     |
| 0,0  | 0,5                                    | 0,5        | 0,9                                                    | 2,3                      | 0,0                        | 0,0                        | 0,0                            | 1,6                | 0,9                    | 0,0                   | 0,0             | 0,0             | 0,0                | 0,5                            | 0,0                                         | 0,0                  | 0,0                    | 0,0                    | 0,0                      | 0,7                | 0,5                     |
| 0,0  | 0,0                                    | 0,0        | 0,0                                                    | 1,1                      | 0,0                        | 0,0                        | 0,0                            | 0,4                | 0,0                    | 1,8                   | 0,0             | 0,0             | 0,0                | 0,4                            | 0,0                                         | 4,8                  | 1,3                    | 0,0                    | 0,0                      | 0,4                | 0,4                     |
| 0,0  | 0,0                                    | 0,4        | 0,4                                                    | 1,7                      | 0,0                        | 0,0                        | 0,0                            | 1,1                | 0,0                    | 0,0                   | 0,0             | 0,0             | 0,4                | 0,0                            | 0,0                                         | 1,3                  | 0,4                    | 0,0                    | 0,0                      | 0,4                | 0,0                     |
| 0,0  | 0,0                                    | 0,4        | 0,4                                                    | 1,1                      | 1,6                        | 0,0                        | 0,0                            | 2,0                | 0,0                    | 0,0                   | 0,0             | 0,0             | 0,0                | 0,4                            | 0,0                                         | 0,0                  | 0,0                    | 0,0                    | 0,0                      | 0,0                | 0,0                     |
| 0,0  | 0,0                                    | 0,5        | 0,5                                                    | 0,5                      | 0,0                        | 0,0                        | 0,0                            | 0,9                | 0,0                    | 0,5                   | 0,0             | 0,0             | 0,0                | 0,0                            | 0,0                                         | 0,9                  | 0,0                    | 0,0                    | 0,0                      | 0,0                | 0,0                     |
| 0,0  | 0,0                                    | 1,7        | 0,4                                                    | 1,7                      | 0,0                        | 0,0                        | 0,0                            | 1,7                | 0,2                    | 0,0                   | 0,4             | *               | 0,0                | 0,0                            | 0,0                                         | 0,0                  | 0,4                    | 0,4                    | 0,0                      | 0,4                | 0,0                     |
| 0,0  | 0,0                                    | 0,6        | 0,0                                                    | 0,6                      | 0,2                        | 0,0                        | 0,0                            | 1,0                | 0,4                    | 0,0                   | 0,0             | 0,0             | 0,4                | 0,4                            | 0,0                                         | 0,0                  | 0,4                    | 0,0                    | 0,0                      | 0,6                | 0,0                     |
| 0,0  | 0,0                                    | 0,6        | 1,4                                                    | 1,2                      | 0,0                        | 0,0                        | 0,0                            | 0,4                | 0,0                    | 0,4                   | 0,0             | 0,4             | 0,0                | 0,0                            | 0,0                                         | 0,0                  | 0,0                    | 0,0                    | 0,0                      | 1,2                | 1,2                     |
| 0,0  | 0,0                                    | 0,9        | 2,8                                                    | 1,5                      | 0,0                        | 0,0                        | 0,0                            | 0,2                | 0,4                    | 0,0                   | 0,0             | 0,0             | 0,0                | 0,0                            | 0,0                                         | 0,0                  | 0,0                    | 0,0                    | 0,0                      | 0,0                | 0,2                     |
| 0,0  | 0,0                                    | 0,0        | 0,0                                                    | 1,1                      | 0,0                        | 0,0                        | 0,0                            | 1,7                | 0,0                    | 0,0                   | 0,0             | 0,0             | 0,0                | *                              | 0,0                                         | 0,0                  | 1,3                    | 0,0                    | 0,0                      | 2,0                | 0,2                     |
| 0,0  | 0,0                                    | 0,0        | 0,4                                                    | 2,9                      | 0,0                        | 0,0                        | 0,0                            | 0,4                | 0,0                    | 0,0                   | 0,0             | 0,0             | 0,0                | 0,0                            | 0,0                                         | 0,0                  | 0,0                    | 0,0                    | 0,0                      | 0,0                | 0,0                     |
| 0,0  | 0,0                                    | 0,0        | 2,5                                                    | 1,4                      | 0,0                        | 0,0                        | 0,0                            | 1,2                | 1,0                    | 0,0                   | 0,0             | 0,0             | 0,0                | 0,0                            | 0,0                                         | 0,0                  | 1,2                    | 0,0                    | 0,0                      | 1,6                | 0,0                     |









|                        |     |      |     |     |     |     |     |     |     |     |     |     |     |     |     |     |     |     |     |     |     |     |  |
|------------------------|-----|------|-----|-----|-----|-----|-----|-----|-----|-----|-----|-----|-----|-----|-----|-----|-----|-----|-----|-----|-----|-----|--|
| Trigonpyxidium sp.     | 0,0 |      |     |     |     |     |     |     |     |     |     |     |     |     |     |     |     |     |     |     |     |     |  |
| Trithyrodinium evittii | 0,0 |      |     |     |     |     |     |     |     |     |     |     |     |     |     |     |     |     |     |     |     |     |  |
|                        | 0,0 | 2,0  | 1,4 | 0,0 | 1,6 | 0,4 | 2,8 | 1,6 | 0,0 | 0,4 | 0,0 | 0,0 | 0,0 | 0,0 | 0,0 | 0,0 | 0,0 | 0,0 | 0,0 | 0,0 | 0,0 | 0,0 |  |
|                        | 0,0 | 4,5  | 0,9 | 0,4 | 0,9 | 0,0 | 0,0 | 0,0 | 0,0 | 0,0 | 0,0 | 0,0 | 0,0 | 0,0 | 0,0 | 0,0 | 0,0 | 0,0 | 0,0 | 0,0 | 0,0 | 0,0 |  |
|                        | 0,0 | 3,6  | 2,6 | 0,0 | 1,8 | 0,4 | 2,8 | 0,0 | 0,0 | 0,0 | 0,0 | 0,0 | 0,0 | 0,8 | 0,0 | 0,0 | 0,0 | 0,0 | 0,0 | 0,0 | 0,0 | 0,0 |  |
|                        | 0,0 | 4,2  | 4,6 | 0,0 | 0,4 | 0,0 | 1,2 | 0,4 | 0,0 | 0,0 | 0,0 | 0,0 | 0,0 | 0,0 | 0,0 | 0,0 | 0,0 | 0,0 | 0,8 | 0,0 | 0,0 | 0,0 |  |
|                        | 0,0 | 2,9  | 2,5 | 0,0 | 1,2 | 0,0 | 0,0 | 0,0 | 0,0 | 0,0 | 0,0 | 0,0 | 0,0 | 0,0 | 0,0 | 0,0 | 0,0 | 0,0 | 0,0 | 0,0 | 0,0 | 0,0 |  |
|                        | 0,0 | 3,6  | 3,8 | 0,0 | 2,1 | 0,4 | 2,1 | 0,0 | 0,0 | 0,0 | 0,0 | 0,0 | 0,0 | 0,4 | 0,0 | 0,0 | 0,0 | 0,0 | 0,0 | 0,0 | 0,0 | 0,0 |  |
|                        | 0,0 | 6,5  | 2,9 | 0,0 | 2,0 | 1,2 | 0,4 | 0,0 | 0,0 | 0,8 | 0,0 | 0,0 | 0,0 | 0,0 | 0,0 | 0,0 | 0,0 | 0,0 | 0,0 | 0,0 | 0,0 | 0,0 |  |
|                        | 0,0 | 7,1  | 1,5 | 0,8 | 2,1 | 1,2 | 2,1 | 0,0 | 0,0 | 0,0 | 0,0 | 0,0 | 0,0 | 0,0 | 0,0 | 0,0 | 0,0 | 0,0 | 0,0 | 0,0 | 0,0 | 0,0 |  |
|                        | 0,0 | 4,7  | 4,2 | 0,0 | 0,9 | 0,9 | 0,9 | 0,4 | 0,0 | 0,0 | 0,4 | 0,9 | 0,0 | 0,0 | 0,0 | 0,0 | 0,0 | 0,0 | 0,0 | 0,0 | 0,0 | 0,0 |  |
|                        | 0,0 | 2,0  | 1,0 | 0,0 | 0,0 | 0,3 | 1,0 | 0,0 | 0,0 | 0,0 | 0,0 | 0,0 | 0,0 | 0,0 | 0,0 | 0,0 | 0,0 | 0,0 | 0,0 | 0,0 | 0,0 | 0,0 |  |
|                        | 0,0 | 3,4  | 4,2 | 0,0 | 0,8 | 0,8 | 3,4 | 0,0 | 0,0 | 0,0 | 0,0 | 0,4 | 0,0 | 0,0 | 0,0 | 0,0 | 0,0 | 0,0 | 0,0 | 0,0 | 0,0 | 0,0 |  |
|                        | 0,0 | 8,4  | 2,8 | 0,0 | 0,2 | 0,4 | 0,8 | 0,0 | 0,0 | 0,0 | 0,0 | 0,0 | 0,0 | 0,0 | 0,0 | 0,0 | 0,0 | 0,0 | 0,0 | 0,0 | 0,0 | 0,0 |  |
|                        | 0,0 | 2,6  | 3,8 | 0,2 | 0,0 | 0,3 | 1,7 | 0,0 | 0,0 | 0,0 | 0,0 | 0,3 | 0,0 | 0,0 | 0,0 | 0,0 | 0,0 | 0,0 | 0,0 | 0,0 | 0,0 | 0,0 |  |
|                        | 0,0 | 1,4  | 1,5 | 0,0 | 0,3 | 0,0 | 0,3 | 0,0 | 0,0 | 0,0 | 0,0 | 0,3 | 0,3 | 0,0 | 0,0 | 0,0 | 0,0 | 0,0 | 0,0 | 0,0 | 0,0 | 0,0 |  |
|                        | 0,0 | 0,9  | 0,7 | 0,0 | 0,2 | 0,0 | 0,0 | 0,0 | 0,0 | 0,0 | 0,0 | 0,2 | 0,0 | 0,0 | 0,0 | 0,0 | 0,0 | 0,0 | 0,0 | 0,0 | 0,0 | 0,0 |  |
|                        | 0,0 | 0,0  | 1,1 | 0,0 | 0,0 | 0,0 | 0,0 | 0,0 | 0,0 | 0,3 | 0,0 | 0,0 | 0,0 | 0,0 | 0,0 | 0,0 | 0,0 | 0,0 | 0,0 | 0,0 | 0,0 | 0,0 |  |
|                        | 0,0 | 0,2  | 0,2 | 0,0 | 0,0 | 0,0 | 0,0 | 0,0 | 0,0 | 0,0 | 0,0 | 0,2 | 0,0 | 0,0 | 0,0 | 0,0 | 0,0 | 0,0 | 0,0 | 0,0 | 0,0 | 0,0 |  |
|                        | 0,0 | 0,3  | 0,3 | 0,0 | 0,2 | 0,0 | 0,9 | 0,0 | 0,0 | 0,0 | 0,0 | 0,0 | 0,3 | 0,0 | 0,0 | 0,0 | 0,3 | 0,0 | 0,0 | 0,0 | 0,0 | 0,0 |  |
|                        | 0,0 | 1,3  | 1,3 | 0,0 | 0,0 | 0,0 | 0,0 | 0,0 | 0,0 | 0,0 | 0,0 | 0,8 | 0,3 | 0,0 | 0,0 | 0,0 | 0,0 | 0,0 | 0,0 | 0,0 | 0,0 | 0,0 |  |
|                        | 0,0 | 0,9  | 2,1 | 0,0 | 0,0 | 0,0 | 0,0 | 0,0 | 0,0 | 0,0 | 0,0 | 0,3 | 0,0 | 0,0 | 0,0 | 0,0 | 0,3 | 0,0 | 0,3 | 0,0 | 0,0 | 0,0 |  |
|                        | 0,0 | 10,4 | 2,2 | 3,1 | 0,0 | 0,4 | 0,0 | 0,0 | 0,0 | 0,0 | 0,0 | 0,0 | 0,0 | 0,0 | 0,0 | 0,0 | 0,0 | 0,0 | 0,0 | 0,0 | 0,0 | 0,0 |  |
|                        | 0,0 | 6,6  | 1,1 | 0,0 | 0,0 | 0,3 | 0,0 | 0,0 | 0,0 | 0,0 | 0,0 | 0,3 | 0,0 | 0,0 | 0,0 | 0,0 | 0,3 | 0,0 | 0,0 | 0,0 | 0,0 | 0,0 |  |
|                        | 0,0 | 0,0  | 0,0 | 0,5 | 0,0 | 0,0 | 1,0 | 0,0 | 0,0 | 0,0 | 0,0 | 0,5 | 0,0 | 0,3 | 0,0 | 0,0 | 0,3 | 0,0 | 0,3 | 0,0 | 0,0 | 0,0 |  |
|                        | 0,0 | 1,0  | 0,0 | 0,0 | 0,0 | 0,0 | 0,0 | 0,0 | 0,0 | 0,0 | 0,0 | 0,0 | 0,0 | 0,0 | 0,0 | 0,0 | 0,0 | 0,0 | 0,0 | 0,0 | 0,0 | 0,0 |  |
|                        | 0,0 | 1,2  | 5,4 | 4,0 | 0,0 | 1,4 | 2,0 | 2,0 | 0,0 | 0,0 | 0,8 | 0,0 | 0,0 | 0,0 | 0,0 | 0,0 | 0,0 | 0,0 | 0,0 | 0,0 | 0,0 | 0,0 |  |
|                        | 0,4 | 0,0  | 6,0 | 5,6 | 0,0 | 1,5 | 0,4 | 1,3 | 0,0 | 0,0 | 0,4 | 0,4 | 0,4 | 0,4 | 0,4 | 0,4 | 0,4 | 0,4 | 0,4 | 0,4 | 0,0 | 0,0 |  |
|                        | 0,0 | 0,6  | 7,3 | 3,4 | 0,0 | 1,1 | 0,9 | 1,3 | 0,0 | 0,0 | 0,0 | 2,2 | 0,9 | 0,0 | 0,0 | 0,0 | 0,0 | 0,0 | 0,0 | 0,0 | 0,0 | 0,0 |  |
|                        | 0,0 | 2,5  | 6,7 | 4,4 | 0,0 | 0,8 | 0,4 | 1,7 | 0,4 | 0,0 | 0,4 | 0,4 | 0,4 | 0,0 | 0,0 | 0,0 | 0,0 | 0,0 | 0,0 | 0,0 | 0,0 | 0,0 |  |
|                        | 0,0 | 0,9  | 3,9 | 4,6 | 0,0 | 1,1 | 0,9 | 1,4 | 0,0 | 0,0 | 0,9 | 0,5 | 0,9 | 0,0 | 0,0 | 0,0 | 0,0 | 0,0 | 0,0 | 0,0 | 0,0 | 0,0 |  |
|                        | 0,0 | 0,0  | 7,9 | 3,7 | 0,0 | 0,9 | 2,6 | 1,3 | 0,0 | 0,4 | 0,0 | 1,3 | 0,9 | 0,0 | 0,0 | 0,0 | 0,0 | 0,0 | 0,0 | 0,0 | 0,0 | 0,0 |  |
|                        | 0,0 | 1,7  | 3,3 | 6,1 | 0,0 | 2,0 | 1,3 | 0,0 | 0,0 | 0,0 | 0,0 | 0,0 | 0,0 | 0,0 | 0,0 | 0,0 | 0,0 | 0,0 | 0,0 | 0,0 | 0,0 | 0,0 |  |
|                        | 0,0 | 1,8  | 8,2 | 6,9 | 0,0 | 0,4 | 1,8 | 0,4 | 0,0 | 0,0 | 0,0 | 1,3 | 0,9 | 0,0 | 0,0 | 0,0 | 0,0 | 0,0 | 0,0 | 0,0 | 0,0 | 0,0 |  |
|                        | 0,0 | 5,9  | 9,0 | 5,4 | 0,0 | 0,5 | 0,5 | 1,8 | 0,0 | 0,0 | 0,0 | 1,4 | 0,0 | 0,0 | 0,0 | 0,0 | 0,0 | 0,0 | 0,0 | 0,0 | 0,0 | 0,0 |  |
|                        | 0,0 | 5,4  | 5,4 | 4,4 | 0,4 | 0,0 | 0,0 | 0,4 | 0,0 | 0,0 | 0,0 | 0,4 | 0,9 | 0,0 | 0,0 | 0,0 | 0,0 | 0,0 | 0,0 | 0,0 | 0,0 | 0,0 |  |
|                        | 0,0 | 2,9  | 5,6 | 4,1 | 0,0 | 0,2 | 1,7 | 0,8 | 0,0 | 0,0 | 0,0 | 1,3 | 0,0 | 0,0 | 0,0 | 0,0 | 0,0 | 0,0 | 0,4 | 0,0 | 0,0 | 0,0 |  |
|                        | 0,0 | 2,8  | 7,1 | 5,8 | 0,0 | 0,8 | 2,0 | 4,1 | 0,0 | 0,0 | 0,0 | 2,4 | 0,8 | 0,4 | 0,0 | 0,0 | 0,0 | 0,0 | 0,0 | 0,0 | 0,0 | 0,0 |  |
|                        | 0,0 | 5,8  | 7,3 | 5,6 | 0,0 | 0,4 | 0,4 | 2,1 | 0,0 | 0,0 | 0,0 | 1,7 | 0,9 | 0,0 | 0,0 | 0,0 | 0,0 | 0,0 | 0,0 | 0,0 | 0,0 | 0,0 |  |
|                        | 0,4 | 3,5  | 2,6 | 1,5 | 0,0 | 0,4 | 0,4 | 3,1 | 0,0 | 0,0 | 0,0 | 2,6 | 0,4 | 0,0 | 0,0 | 0,0 | 0,0 | 0,0 | 0,0 | 0,0 | 0,0 | 0,0 |  |
|                        | 0,4 | 2,7  | 1,3 | 2,5 | 0,7 | 1,3 | 0,9 | 2,2 | 0,0 | 0,0 | 0,0 | 0,9 | 0,9 | 0,0 | 0,0 | 0,0 | 0,0 | 0,0 | 0,0 | 0,0 | 0,0 | 0,0 |  |
|                        | 0,0 | 5,2  | 2,1 | 1,9 | 0,8 | 0,4 | 0,0 | 0,4 | 0,0 | 0,0 | 0,0 | 0,0 | 0,0 | 0,0 | 0,4 | 0,0 | 0,0 | 0,4 | 0,0 | 0,0 | 0,0 | 0,0 |  |

|     |     |      |     |     |     |      |     |     |                      |     |     |
|-----|-----|------|-----|-----|-----|------|-----|-----|----------------------|-----|-----|
| 0,0 | 0,0 | 0,8  | 0,0 | 0,0 | 0,8 | 2,0  | 0,0 | 0,0 | 309                  | 254 | 45  |
| 0,0 | 0,0 | 0,0  | 0,0 | 0,0 | 0,0 | 0,0  | 0,0 | 0,0 | 248                  | 224 | 34  |
| 0,0 | 0,0 | 1,2  | 0,0 | 0,0 | 0,0 | 5,2  | 0,0 | 0,0 | 308                  | 249 | 41  |
| 0,0 | 0,0 | 1,2  | 0,0 | 0,0 | 0,0 | 5,8  | 0,0 | 0,0 | 288                  | 241 | 47  |
| 0,0 | 0,0 | 0,8  | 0,0 | 0,0 | 0,0 | 0,8  | 0,0 | 0,0 | 265                  | 242 | 85  |
| 0,4 | 0,0 | 0,9  | 0,0 | 0,0 | 0,4 | 1,3  | 0,0 | 0,0 | 262                  | 236 | 70  |
| 0,0 | 0,0 | 0,0  | 0,0 | 0,0 | 0,0 | 6,9  | 0,0 | 0,0 | 316                  | 246 | 39  |
| 0,0 | 0,0 | 2,5  | 0,0 | 0,0 | 0,0 | 2,5  | 0,0 | 0,0 | 322                  | 241 | 33  |
| 0,0 | 0,0 | 1,3  | 0,0 | 0,0 | 0,0 | 0,9  | 0,4 | 0,0 | 260                  | 225 | 94  |
| 0,0 | 0,0 | 0,7  | 0,0 | 0,0 | 0,0 | 6,5  | 0,0 | 0,0 | 379                  | 295 | 99  |
| 0,0 | 0,0 | 3,0  | 0,0 | 0,0 | 0,4 | 5,5  | 0,0 | 0,0 | 319                  | 237 | 71  |
| 0,0 | 0,0 | 3,6  | 0,0 | 0,0 | 0,8 | 6,0  | 0,0 | 0,0 | 331                  | 251 | 53  |
| 0,0 | 0,0 | 1,7  | 0,0 | 0,0 | 0,3 | 3,8  | 0,0 | 0,0 | 365                  | 290 | 76  |
| 0,0 | 0,0 | 0,0  | 0,0 | 0,0 | 0,6 | 1,2  | 0,0 | 0,0 | 355                  | 324 | 41  |
| 0,0 | 0,0 | 0,0  | 0,0 | 0,0 | 0,0 | 0,9  | 0,0 | 0,0 | 468                  | 430 | 67  |
| 0,0 | 0,0 | 0,0  | 0,0 | 0,0 | 0,3 | 0,8  | 0,0 | 0,0 | 385                  | 367 | 44  |
| 0,0 | 0,0 | 0,0  | 0,0 | 0,0 | 0,0 | 0,2  | 0,0 | 0,0 | 460                  | 449 | 10  |
| 0,0 | 0,0 | 0,0  | 0,0 | 0,0 | 0,0 | 2,2  | 0,0 | 0,0 | 371                  | 319 | 31  |
| 0,0 | 0,0 | 0,0  | 0,0 | 0,0 | 0,5 | 2,9  | 0,0 | 0,0 | 430                  | 386 | 78  |
| 0,0 | 0,0 | 0,3  | 0,0 | 0,0 | 0,6 | 0,6  | 0,0 | 0,0 | 347                  | 317 | 62  |
| 0,0 | 0,0 | 0,3  | 0,0 | 0,0 | 0,3 | 1,3  | 0,0 | 0,0 | 431                  | 383 | 117 |
| 0,0 | 0,0 | 1,7  | 0,0 | 0,0 | 0,3 | 2,8  | 0,0 | 0,0 | 406                  | 364 | 55  |
| 0,0 | 0,0 | 0,8  | 0,0 | 0,0 | 0,5 | 2,1  | 0,0 | 0,0 | 426                  | 385 | 11  |
| 0,0 | 0,0 | 0,2  | 0,0 | 0,0 | 0,0 | 0,2  | 0,0 | 0,0 | 414                  | 411 | 6   |
| 0,0 | 0,0 | 1,6  | 0,0 | 0,0 | 0,8 | 2,8  | 0,0 | 0,0 | 336                  | 248 | 73  |
| 0,9 | 0,0 | 2,6  | 0,0 | 0,0 | 1,7 | 3,5  | 0,0 | 0,0 | 329                  | 234 | 84  |
| 0,0 | 0,0 | 7,0  | 0,0 | 0,0 | 1,7 | 3,9  | 0,0 | 0,0 | 364                  | 234 | 65  |
| 0,0 | 0,0 | 4,3  | 0,0 | 0,0 | 1,3 | 3,4  | 0,0 | 0,0 | 339                  | 238 | 63  |
| 0,0 | 0,0 | 6,1  | 0,0 | 0,0 | 2,8 | 4,7  | 0,0 | 0,0 | 331                  | 220 | 61  |
| 0,0 | 0,0 | 8,8  | 0,0 | 0,0 | 0,4 | 3,5  | 0,0 | 0,0 | 339                  | 228 | 79  |
| 0,0 | 0,0 | 7,0  | 0,0 | 0,0 | 0,9 | 6,1  | 0,0 | 0,0 | 337                  | 231 | 92  |
| 0,4 | 0,0 | 4,0  | 0,0 | 0,0 | 0,9 | 4,0  | 0,0 | 0,0 | 314                  | 225 | 93  |
| 0,0 | 0,0 | 8,7  | 0,0 | 0,0 | 1,4 | 5,0  | 0,0 | 0,0 | 332                  | 221 | 91  |
| 0,0 | 0,0 | 7,1  | 0,0 | 0,0 | 2,2 | 2,2  | 1,8 | 0,0 | 307                  | 230 | 76  |
| 0,0 | 0,0 | 7,6  | 0,0 | 0,0 | 1,3 | 10,5 | 0,0 | 0,0 | 363                  | 241 | 67  |
| 0,0 | 0,0 | 4,5  | 0,4 | 0,0 | 0,8 | 2,0  | 0,0 | 0,0 | 367                  | 248 | 86  |
| 0,0 | 0,0 | 6,9  | 0,4 | 0,0 | 0,4 | 2,6  | 0,0 | 0,0 | 345                  | 234 | 85  |
| 0,0 | 0,0 | 6,1  | 0,0 | 0,0 | 0,4 | 2,2  | 0,0 | 0,0 | 319                  | 229 | 43  |
| 0,0 | 0,0 | 10,8 | 0,0 | 0,0 | 0,4 | 2,7  | 0,0 | 0,0 | 317                  | 224 | 42  |
| 0,0 | 0,0 | 2,8  | 0,0 | 0,0 | 1,2 | 2,0  | 0,0 | 0,0 | 293                  | 258 | 56  |
|     |     |      |     |     |     |      |     |     | Total # Palynomorphs |     |     |
|     |     |      |     |     |     |      |     |     | Total # Dinocysts    |     |     |
|     |     |      |     |     |     |      |     |     | Total # P-cysts      |     |     |

| MORPHOGROUP | Palynodinium | Areoligera group | Spiniferites cpx | Hystriosphæridium spp. | Fibrous cribroperidinioids | Peridinioids | Manumiella | other dinocysts |             |
|-------------|--------------|------------------|------------------|------------------------|----------------------------|--------------|------------|-----------------|-------------|
| 0,0         |              |                  |                  |                        |                            |              |            |                 |             |
| 0,4         | 49,6         | 17,1             | 0,0              | 4,7                    | 17,5                       | 0,0          | 11,0       |                 | 2,498377045 |
| 1,2         | 8,5          | 40,3             | 4,0              | 7,4                    | 14,3                       | 0,0          | 25,1       |                 | 2,798698326 |
| 0,0         | 17,3         | 17,5             | 4,6              | 27,2                   | 16,5                       | 0,0          | 15,7       |                 | 3,023905552 |
| 0,0         | 37,0         | 19,5             | 3,7              | 6,9                    | 19,5                       | 0,0          | 13,3       |                 | 2,463672041 |
| 0,0         | 21,1         | 15,5             | 6,2              | 7,0                    | 35,1                       | 0,0          | 15,1       |                 | 2,712350119 |
| 0,0         | 18,9         | 14,8             | 3,0              | 15,9                   | 29,4                       | 0,0          | 18,0       |                 | 3,356682236 |
| 0,0         | 16,1         | 32,0             | 5,9              | 4,3                    | 15,9                       | 0,0          | 25,9       |                 | 2,795036309 |
| 1,2         | 38,7         | 18,3             | 5,2              | 1,2                    | 13,7                       | 0,0          | 21,6       |                 | 2,782455568 |
| 6,9         | 0,4          | 24,1             | 2,2              | 11,6                   | 28,7                       | 12,7         | 13,4       |                 | 3,151167469 |
| 9,0         | 0,3          | 29,5             | 1,5              | 16,1                   | 19,2                       | 13,9         | 10,4       |                 | 2,572569376 |
| 9,7         | 1,3          | 29,4             | 0,4              | 13,1                   | 23,9                       | 5,5          | 16,7       |                 | 2,948729333 |
| 18,8        | 0,8          | 16,2             | 1,0              | 26,5                   | 18,2                       | 2,8          | 15,8       |                 | 2,591723916 |
| 21,4        | 1,0          | 22,6             | 0,3              | 20,7                   | 25,9                       | 0,0          | 8,1        |                 | 2,640882323 |
| 56,9        | 0,0          | 11,1             | 0,9              | 13,9                   | 12,2                       | 0,3          | 4,6        |                 | 1,874262165 |
| 62,6        | 0,5          | 7,5              | 0,3              | 9,8                    | 14,9                       | 0,2          | 4,2        |                 | 1,743571901 |
| 62,4        | 0,0          | 6,5              | 0,5              | 17,2                   | 11,7                       | 0,0          | 1,6        |                 | 1,72113261  |
| 81,6        | 0,0          | 1,3              | 0,0              | 14,4                   | 2,2                        | 0,0          | 0,4        |                 | 0,839406096 |
| 60,8        | 0,6          | 5,5              | 0,0              | 21,5                   | 9,7                        | 0,0          | 1,9        |                 | 1,668256943 |
| 38,5        | 0,3          | 5,7              | 0,0              | 31,3                   | 20,2                       | 0,0          | 4,0        |                 | 1,982902345 |
| 27,0        | 0,6          | 10,7             | 0,8              | 38,2                   | 19,4                       | 0,0          | 3,3        |                 | 1,979519906 |
| 29,8        | 0,3          | 4,0              | 0,3              | 31,6                   | 29,9                       | 0,3          | 3,9        |                 | 2,096671029 |
| 28,7        | 0,5          | 7,6              | 0,7              | 42,7                   | 15,0                       | 0,0          | 4,8        |                 | 1,929880452 |
| 14,3        | 0,5          | 10,3             | 0,8              | 69,5                   | 2,6                        | 0,3          | 1,8        |                 | 1,68695924  |
| 82,4        | 0,2          | 2,4              | 0,5              | 12,5                   | 1,5                        | 0,0          | 0,5        |                 | 1,013116752 |
| 2,0         | 3,0          | 41,3             | 1,8              | 4,4                    | 29,4                       | 0,0          | 17,9       |                 | 2,797343399 |
| 0,0         | 6,4          | 32,5             | 4,1              | 3,6                    | 35,5                       | 0,0          | 17,9       |                 | 2,988340356 |
| 0,4         | 4,5          | 41,0             | 1,5              | 4,7                    | 27,1                       | 0,0          | 20,7       |                 | 2,895959862 |
| 0,0         | 2,9          | 45,5             | 2,5              | 4,8                    | 25,7                       | 0,0          | 18,5       |                 | 2,784457658 |
| 0,9         | 6,8          | 39,6             | 2,1              | 6,4                    | 26,2                       | 0,0          | 18,0       |                 | 2,993472954 |
| 0,0         | 3,1          | 31,6             | 2,6              | 2,9                    | 33,6                       | 0,0          | 26,3       |                 | 2,952270286 |
| 1,1         | 5,2          | 30,8             | 2,4              | 3,9                    | 38,2                       | 0,0          | 18,4       |                 | 2,986385661 |
| 0,9         | 3,3          | 29,4             | 0,4              | 4,0                    | 41,2                       | 0,0          | 20,7       |                 | 2,963154742 |
| 0,0         | 3,4          | 23,8             | 2,3              | 0,9                    | 37,8                       | 0,0          | 31,9       |                 | 3,073979031 |
| 0,0         | 3,5          | 27,9             | 7,0              | 3,5                    | 30,7                       | 0,0          | 27,5       |                 | 3,343124325 |
| 0,4         | 3,7          | 36,3             | 6,0              | 2,1                    | 27,0                       | 0,0          | 24,5       |                 | 2,984154074 |
| 0,0         | 6,0          | 30,6             | 2,6              | 5,4                    | 32,7                       | 0,0          | 22,6       |                 | 3,208818576 |
| 0,9         | 3,4          | 29,5             | 4,3              | 5,6                    | 35,7                       | 0,0          | 20,7       |                 | 3,003155029 |
| 0,0         | 6,8          | 47,2             | 3,7              | 3,3                    | 18,6                       | 0,0          | 20,5       |                 | 2,635206825 |
| 0,0         | 7,4          | 50,0             | 1,3              | 3,3                    | 18,1                       | 0,0          | 19,9       |                 | 2,644084595 |
| 0,0         | 19,4         | 33,8             | 5,2              | 6,0                    | 21,4                       | 0,0          | 14,2       |                 | 3,168463448 |

Shannon-H

**SI Table S2 – Meirs Farm dinoflagellate record (relative abundances)**

| Code | Interval      | Average depth (ft.) | Average depth (m) | Distance from KTB (cm) | Achilleodinium biannii | Achomphaera sagena | Achomphaera sp. | Adnatosphaeridium buccinum | Alisocysta circumtabulata | Alisocysta reticulata | Alterbidinium? Pentaradiatum | Andalusiella gabonensis | Andalusiella polymorpha | Apteodinium? | Areoligera senoniensis | Areoligera volata |
|------|---------------|---------------------|-------------------|------------------------|------------------------|--------------------|-----------------|----------------------------|---------------------------|-----------------------|------------------------------|-------------------------|-------------------------|--------------|------------------------|-------------------|
| MF1  | 24.0 - 24.1   | 24,05               | 7,33              | 559,0                  | Barren                 |                    |                 |                            |                           |                       |                              |                         |                         |              |                        |                   |
| MF1  | 27.3 - 27.4   | 27,35               | 8,34              | 458,4                  | Barren                 |                    |                 |                            |                           |                       |                              |                         |                         |              |                        |                   |
| MF1  | 29.4 - 29.5   | 29,45               | 8,98              | 394,4                  | Barren                 |                    |                 |                            |                           |                       |                              |                         |                         |              |                        |                   |
| MF1  | 32.4 - 32.5   | 32,45               | 9,89              | 302,9                  | Barren                 |                    |                 |                            |                           |                       |                              |                         |                         |              |                        |                   |
| MF1  | 34.9 - 35.0   | 34,95               | 10,65             | 226,7                  | Barren                 |                    |                 |                            |                           |                       |                              |                         |                         |              |                        |                   |
| MF1  | 37.4 - 37.5   | 37,45               | 11,41             | 150,5                  | Barren                 |                    |                 |                            |                           |                       |                              |                         |                         |              |                        |                   |
| MF1  | 39.9 - 40.0   | 39,95               | 12,18             | 74,3                   |                        | 0,4                | 0,0             | 4,2                        | 0,0                       | 0,0                   | 0,4                          | 0,0                     | 0,0                     | 0,0          | 6,3                    | 9,2               |
| MF1  | 40,5 - 40.6   | 40,55               | 12,36             | 56,0                   |                        | 0,5                | 0,2             | 0,5                        | 0,0                       | 0,0                   | 0,0                          | 0,0                     | 0,0                     | 0,5          | 27,4                   | 7,3               |
| MF1  | 40.9 - 41.0   | 40,95               | 12,48             | 43,8                   |                        | 0,4                | 0,0             | 2,0                        | 0,0                       | 0,4                   | 0,4                          | 0,0                     | 0,0                     | 0,0          | 3,4                    | 3,6               |
| MF1  | 41.1 - 41.2   | 41,15               | 12,54             | 37,7                   |                        | 0,9                | 0,0             | 2,4                        | 0,0                       | 0,0                   | 0,0                          | 0,0                     | 0,0                     | 0,0          | 0,9                    | 1,7               |
| MF1  | 41.45 - 41.5  | 41,475              | 12,64             | 27,8                   |                        | 0,9                | 0,0             | 1,8                        | 0,0                       | 0,4                   | 0,0                          | 0,7                     | 0,0                     | 0,0          | 0,9                    | 5,1               |
| MF1  | 41.7 - 41.8   | 41,75               | 12,73             | 19,5                   |                        | 0,9                | 0,0             | 2,6                        | 0,0                       | 0,0                   | 0,0                          | 0,0                     | 0,0                     | 0,0          | 0,0                    | 4,8               |
| MF1  | 42.0 - 42.05  | 42,025              | 12,81             | 11,1                   |                        | 2,7                | 0,0             | 3,2                        | 0,0                       | 0,0                   | 0,0                          | 0,0                     | 0,0                     | 0,0          | 0,0                    | 3,4               |
| MF1  | 42.05 - 42.10 | 42,075              | 12,82             | 9,6                    |                        | 2,6                | 0,0             | 2,4                        | 0,0                       | 0,4                   | 0,0                          | 0,0                     | 0,0                     | 0,0          | 1,8                    | 3,1               |
| MF1  | 42.12 - 42.18 | 42,15               | 12,85             | 7,3                    |                        | 0,8                | 0,0             | 2,5                        | 0,0                       | 0,0                   | 0,0                          | 0,0                     | 0,0                     | 0,0          | 0,2                    | 0,0               |
| MF1  | 42.2 - 42.25  | 42,225              | 12,87             | 5,0                    |                        | 0,5                | 0,0             | 4,8                        | 0,0                       | 0,0                   | 0,0                          | 0,2                     | 0,7                     | 0,0          | 3,1                    | 1,9               |
| MF1  | 42.25 - 42.31 | 42,28               | 12,89             | 3,3                    |                        |                    |                 |                            |                           |                       |                              |                         |                         |              |                        |                   |
| MF1  | 42.3 - 42.35  | 42,325              | 12,90             | 1,9                    |                        | 1,9                | 0,0             | 3,3                        | 0,0                       | 0,0                   | 0,0                          | 0,5                     | 0,0                     | 0,0          | 2,7                    | 1,1               |
| MF1  | 42.4 - 42.5   | 42,45               | 12,94             | -1,9                   |                        | 2,2                | 0,0             | 2,6                        | 0,0                       | 0,0                   | 0,0                          | 0,0                     | 0,0                     | 0,0          | 0,8                    | 2,8               |
| MF1  | 42.5 - 42.6   | 42,55               | 12,97             | -4,9                   |                        | 1,5                | 0,0             | 3,9                        | 0,0                       | 0,0                   | 0,0                          | 0,0                     | 0,0                     | 0,0          | 0,7                    | 0,4               |
| MF1  | 42.95 - 43.0  | 42,975              | 13,10             | -17,9                  |                        | 1,7                | 0,0             | 0,9                        | 0,0                       | 0,0                   | 0,0                          | 0,4                     | 0,0                     | 0,0          | 0,0                    | 0,0               |
| MF1  | 43.3 - 43.4   | 43,35               | 13,21             | -29,3                  |                        | 1,1                | 0,0             | 0,5                        | 0,0                       | 0,0                   | 0,0                          | 0,0                     | 0,0                     | 0,0          | 0,5                    | 0,5               |
| MF1  | 44.1 - 44.2   | 44,15               | 13,46             | -53,7                  |                        | 0,0                | 0,0             | 1,0                        | 0,0                       | 0,0                   | 0,0                          | 0,0                     | 0,0                     | 0,0          | 0,0                    | 1,2               |
| MF1  | 44.9 - 45.0   | 44,95               | 13,70             | -78,1                  |                        | 0,7                | 0,0             | 1,6                        | 0,0                       | 0,0                   | 0,0                          | 0,0                     | 0,0                     | 0,0          | 0,4                    | 1,3               |
| MF1  | 46.18 - 46.22 | 46,2                | 14,08             | -116,2                 |                        | 1,1                | 0,9             | 6,5                        | 0,0                       | 0,0                   | 0,0                          | 1,1                     | 0,0                     | 0,0          | 0,0                    | 0,4               |
| MF1  | 47.4 - 47.5   | 47,45               | 14,46             | -154,3                 |                        | 0,8                | 0,0             | 0,0                        | 0,0                       | 0,0                   | 0,0                          | 0,8                     | 0,4                     | 0,0          | 0,0                    | 1,4               |
| MF1  | 49.9 - 49.95  | 49,975              | 15,23             | -231,2                 |                        | 0,4                | 0,0             | 2,3                        | 0,0                       | 0,4                   | 0,0                          | 0,4                     | 0,8                     | 0,0          | 0,0                    | 5,9               |
| MF1  | 52.4 - 52.5   | 52,45               | 15,99             | -306,7                 |                        | 2,2                | 0,0             | 0,9                        | 0,0                       | 0,0                   | 0,0                          | 0,9                     | 0,0                     | 0,0          | 0,4                    | 3,9               |
| MF1  | 55.05 - 55.1  | 55,075              | 16,79             | -386,7                 |                        | 0,4                | 0,0             | 3,3                        | 0,0                       | 0,0                   | 0,0                          | 0,4                     | 0,0                     | 0,0          | 3,3                    | 0,9               |
| MF1  | 57.4 - 57.5   | 57,45               | 17,51             | -459,1                 |                        | 2,0                | 0,0             | 3,4                        | 0,0                       | 0,0                   | 0,0                          | 0,4                     | 0,0                     | 0,0          | 2,6                    | 0,8               |
| MF1  | 59.9 - 59.95  | 59,925              | 18,27             | -534,5                 |                        | 0,4                | 0,0             | 2,7                        | 0,0                       | 0,0                   | 0,0                          | 1,8                     | 0,6                     | 0,0          | 3,9                    | 0,8               |
| MF1  | 62.5 - 62.6   | 62,4                | 19,02             | -610,0                 |                        | 0,8                | 0,0             | 2,5                        | 0,0                       | 0,0                   | 0,0                          | 0,0                     | 0,0                     | 0,0          | 5,2                    | 5,6               |
| MF1  | 64.95 - 65.0  | 64,875              | 19,77             | -685,4                 |                        | 0,4                | 0,4             | 1,9                        | 0,0                       | 0,0                   | 0,0                          | 0,2                     | 0,0                     | 0,0          | 13,4                   | 10,2              |
| MF1  | 67.4 - 67.5   | 67,45               | 20,56             | -763,9                 |                        | 0,9                | 0,0             | 1,7                        | 0,0                       | 0,0                   | 0,0                          | 0,4                     | 0,0                     | 0,0          | 3,8                    | 7,9               |
| MF1  | 69.55 - 69.6  | 69,575              | 21,21             | -828,6                 |                        | 0,7                | 0,4             | 2,8                        | 0,0                       | 0,0                   | 0,0                          | 4,3                     | 0,6                     | 0,0          | 0,4                    | 3,7               |
| MF1  | 71.7 - 71.8   | 71,75               | 21,87             | -894,9                 |                        | 0,4                | 0,4             | 0,0                        | 0,4                       | 0,0                   | 0,0                          | 0,2                     | 0,0                     | 0,4          | 27,9                   | 11,8              |





Cribreridinium sp. A of Brinkhuis and Schioler, 1996

| Cribreridinium sp. | Cribreridinium sp. | Cyclonephelium distinctum | Damassadinium cf. californicum | Deflandrea galeata | Deflandrea cf. galeata | Deflandrea ?tuberculata | Diconodinium wilsonii | Dinocyst sp. 1 | Dinocyst sp. 2 | Dinocyst sp. 3 | Dinogymnium sp. | Diphyes sp. | Disphaerogena carposphaeropsis | Disphaerogena carposphaeropsis var. cornuta | Druggidium meerensis | Exosphaeridium bifidum | Exosphaeridium sp. | Fibradinium annetorpense | Fibrocysta axialis | Fibrocysta spp. Undiff. | Florentinia mantellii | Florentinia spp. Undiff. |
|--------------------|--------------------|---------------------------|--------------------------------|--------------------|------------------------|-------------------------|-----------------------|----------------|----------------|----------------|-----------------|-------------|--------------------------------|---------------------------------------------|----------------------|------------------------|--------------------|--------------------------|--------------------|-------------------------|-----------------------|--------------------------|
| 0,4                | 0,0                | 0,0                       | 0,4                            | 0,4                | 0,0                    | 0,4                     | 0,0                   | 0,0            | 1,0            | 0,0            | 0,0             | 0,4         | 0,0                            | 0,0                                         | 0,0                  | 0,4                    | 0,8                | 0,0                      | 0,2                | 0,0                     | 0,0                   | 0,0                      |
| 1,4                | 0,0                | 0,0                       | 0,0                            | 0,0                | 0,0                    | 0,9                     | 0,0                   | 0,0            | 0,0            | 0,0            | 0,0             | 0,5         | 0,0                            | 0,0                                         | 0,0                  | 0,5                    | 0,0                | 0,5                      | 0,0                | 0,0                     | 0,0                   | 0,0                      |
| 2,5                | 0,4                | 0,0                       | 0,0                            | 0,4                | 0,0                    | 0,4                     | 0,0                   | 0,0            | 0,9            | 0,0            | 0,0             | 0,4         | 0,0                            | 0,0                                         | 0,0                  | 0,0                    | 2,0                | 0,0                      | 0,9                | 0,0                     | 0,0                   | 0,0                      |
| 0,9                | 0,0                | 0,0                       | 0,0                            | 0,0                | 0,0                    | 0,7                     | 0,0                   | 0,0            | 0,0            | 0,0            | 0,4             | 0,0         | 0,0                            | 0,0                                         | 0,0                  | 1,7                    | 2,2                | 0,0                      | 0,0                | 0,4                     | 0,4                   | 0,0                      |
| 0,0                | 0,4                | 0,0                       | 0,0                            | 0,0                | 0,0                    | 0,7                     | 0,0                   | 0,0            | 0,0            | 0,0            | 0,0             | 0,9         | 0,0                            | 0,0                                         | 0,0                  | 0,4                    | 0,4                | 0,4                      | 0,0                | 0,0                     | 1,8                   | 0,0                      |
| 0,7                | 0,2                | 0,0                       | 0,0                            | 0,0                | 0,0                    | 0,2                     | 0,0                   | 0,0            | 0,9            | 0,0            | 0,0             | 0,9         | 0,0                            | 0,0                                         | 0,0                  | 0,4                    | 0,7                | 0,0                      | 0,4                | 0,2                     | 0,0                   | 0,0                      |
| 1,6                | 0,5                | 0,0                       | 0,0                            | 0,0                | 0,0                    | 0,9                     | 0,5                   | 0,0            | 0,9            | 0,0            | 0,0             | 0,5         | 0,0                            | 0,5                                         | 0,0                  | 0,5                    | 0,9                | 0,0                      | 0,5                | 0,5                     | 0,0                   | 0,0                      |
| 0,4                | 0,4                | 0,0                       | 0,0                            | 0,0                | 0,0                    | 0,0                     | 0,0                   | 0,0            | 0,4            | 0,0            | 0,0             | 0,0         | 0,0                            | 0,4                                         | 0,0                  | 0,4                    | 0,0                | 0,0                      | 0,0                | 0,0                     | 0,0                   | 0,0                      |
| 0,0                | 0,0                | 0,0                       | 0,0                            | 0,0                | 0,0                    | 0,4                     | 0,0                   | 0,4            | 0,4            | 0,0            | 0,0             | 0,4         | 0,0                            | 0,8                                         | 0,8                  | 0,2                    | 0,0                | 0,4                      | 0,0                | 0,0                     | 0,2                   | 0,0                      |
| 0,5                | 0,0                | 0,0                       | 0,0                            | 0,0                | 0,0                    | 0,0                     | 0,0                   | 0,5            | 1,0            | 0,0            | 0,0             | 0,0         | 0,2                            | 0,0                                         | 0,5                  | 0,7                    | 0,0                | 0,0                      | 0,0                | 0,0                     | 0,0                   | 0,0                      |
| 0,5                | 0,0                | 0,0                       | 0,0                            | 0,0                | 0,0                    | 0,0                     | 0,0                   | 0,0            | 0,0            | 0,0            | 0,0             | 0,0         | 0,0                            | 0,0                                         | 0,0                  | 1,4                    | 1,1                | 1,1                      | 0,0                | 0,0                     | 0,5                   | 0,0                      |
| 0,0                | 0,8                | 0,0                       | 0,0                            | 0,0                | 0,0                    | 0,8                     | 0,0                   | 0,0            | 0,0            | 0,0            | 0,0             | 0,0         | 0,0                            | 0,4                                         | 0,0                  | 3,8                    | 1,4                | 0,0                      | 0,0                | 0,0                     | 0,0                   | 0,0                      |
| 1,3                | 0,0                | 0,4                       | 0,0                            | 0,0                | 0,4                    | 0,4                     | 1,3                   | 0,0            | 0,4            | 0,0            | 0,0             | 0,0         | 0,4                            | 1,8                                         | 0,0                  | 0,2                    | 0,4                | 0,0                      | 0,0                | 0,0                     | 0,4                   | 0,0                      |
| 0,4                | 0,0                | 0,0                       | 0,0                            | 0,0                | 0,0                    | 0,0                     | 0,0                   | 0,0            | 0,0            | 0,0            | 0,0             | 0,0         | 0,0                            | 0,7                                         | 0,0                  | 0,4                    | 0,0                | 0,0                      | 0,0                | 0,0                     | 0,4                   | 0,0                      |
| 0,5                | 0,0                | 0,0                       | 0,0                            | 0,0                | 0,0                    | 0,0                     | 0,0                   | 0,0            | 0,0            | 0,0            | 0,0             | 0,0         | 0,9                            | 0,5                                         | 0,0                  | 0,0                    | 0,0                | 0,0                      | 0,5                | 0,0                     | 0,0                   | 0,0                      |
| 2,0                | 0,4                | 0,0                       | 0,0                            | 0,0                | 0,2                    | 0,4                     | 0,0                   | 0,0            | 0,0            | 0,0            | 0,0             | 0,0         | 2,2                            | 1,2                                         | 0,0                  | 1,2                    | 0,4                | 0,0                      | 0,8                | 0,4                     | 0,8                   | 0,0                      |
| 2,7                | 0,4                | 0,0                       | 0,0                            | 0,4                | 0,4                    | 0,9                     | 0,0                   | 0,0            | 0,0            | 0,0            | 0,0             | 0,0         | 3,8                            | 0,0                                         | 0,0                  | 0,4                    | 0,4                | 0,0                      | 0,0                | 0,4                     | 0,0                   | 0,0                      |
| 0,4                | 0,0                | 0,0                       | 0,0                            | 0,0                | 0,0                    | 0,0                     | 0,0                   | 0,0            | 0,0            | 0,0            | 0,0             | 0,0         | 0,0                            | 2,6                                         | 1,3                  | 0,4                    | 0,0                | 0,0                      | 0,0                | 0,4                     | 0,4                   | 0,0                      |
| 1,2                | 0,4                | 0,0                       | 0,0                            | 0,0                | 0,0                    | 0,8                     | 0,0                   | 0,0            | 0,0            | 0,0            | 0,4             | 0,0         | 0,4                            | 0,0                                         | 0,0                  | 0,0                    | 0,4                | 0,0                      | 0,0                | 0,4                     | 0,0                   | 0,0                      |
| 3,4                | 3,8                | 0,0                       | 0,0                            | 0,8                | 0,0                    | 1,9                     | 0,0                   | 0,0            | 0,0            | 0,0            | 0,0             | 0,4         | 0,0                            | 0,4                                         | 0,0                  | 0,0                    | 0,0                | 0,0                      | 0,0                | 0,0                     | 0,8                   | 0,0                      |
| 0,0                | 3,1                | 0,7                       | 0,0                            | 0,0                | 0,9                    | 2,4                     | 0,4                   | 0,0            | 0,0            | 0,0            | 0,4             | 0,0         | 0,0                            | 0,0                                         | 0,0                  | 2,6                    | 1,3                | 0,0                      | 0,0                | 0,0                     | 0,0                   | 0,0                      |
| 0,0                | 2,4                | 1,3                       | 0,0                            | 0,0                | 0,4                    | 0,0                     | 0,7                   | 0,0            | 0,9            | 0,0            | 0,0             | 0,0         | 0,0                            | 0,0                                         | 0,0                  | 0,4                    | 0,0                | 0,4                      | 0,0                | 0,0                     | 0,4                   | 0,0                      |
| 0,0                | 1,6                | 1,0                       | 0,0                            | 0,0                | 0,8                    | 1,6                     | 2,8                   | 0,0            | 0,0            | 0,0            | 0,0             | 0,0         | 0,0                            | 0,0                                         | 0,0                  | 0,4                    | 1,2                | 0,0                      | 0,0                | 0,0                     | 0,0                   | 0,0                      |
| 0,4                | 0,0                | 1,4                       | 0,0                            | 2,2                | 0,0                    | 0,0                     | 0,8                   | 0,0            | 0,0            | 1,6            | 0,0             | 0,4         | 0,0                            | 0,0                                         | 0,0                  | 0,0                    | 0,0                | 0,0                      | 0,0                | 0,0                     | 0,6                   | 0,4                      |
| 0,0                | 7,1                | 0,0                       | 0,0                            | 0,0                | 0,0                    | 1,0                     | 0,0                   | 0,0            | 0,0            | 0,0            | 0,0             | 0,0         | 0,0                            | 0,0                                         | 0,0                  | 1,7                    | 0,0                | 0,0                      | 0,0                | 0,0                     | 0,0                   | 0,0                      |
| 0,0                | 1,3                | 0,4                       | 0,0                            | 0,0                | 0,4                    | 0,0                     | 0,8                   | 0,0            | 0,4            | 1,1            | 0,0             | 0,0         | 0,0                            | 0,0                                         | 0,0                  | 0,0                    | 0,0                | 0,0                      | 0,0                | 0,0                     | 0,0                   | 0,4                      |
| 0,0                | 1,3                | 1,9                       | 0,0                            | 0,0                | 0,4                    | 2,1                     | 0,0                   | 0,0            | 0,0            | 0,0            | 0,0             | 0,0         | 0,0                            | 0,0                                         | 0,0                  | 1,3                    | 0,0                | 0,0                      | 0,4                | 0,0                     | 0,0                   | 0,0                      |
| 0,0                | 0,0                | 0,4                       | 0,0                            | 3,4                | 0,4                    | 0,7                     | 0,4                   | 0,0            | 0,0            | 0,0            | 0,0             | 0,0         | 0,0                            | 0,0                                         | 0,0                  | 0,4                    | 0,0                | 0,0                      | 0,0                | 0,0                     | 0,4                   | 0,7                      |
| 0,9                | 0,7                | 0,7                       | 0,0                            | 0,4                | 0,0                    | 1,3                     | 0,0                   | 0,0            | 0,0            | 0,0            | 0,0             | 0,0         | 0,0                            | 0,0                                         | 0,0                  | 0,0                    | 0,4                | 0,0                      | 0,7                | 0,0                     | 0,0                   | 0,0                      |

|                                       |      |     |     |     |     |     |     |     |      |      |      |     |     |     |     |     |     |     |     |     |     |     |     |
|---------------------------------------|------|-----|-----|-----|-----|-----|-----|-----|------|------|------|-----|-----|-----|-----|-----|-----|-----|-----|-----|-----|-----|-----|
| Glaphyrocysta castelcasiense          | 0,0  | 0,0 | 0,0 | 0,0 | 0,0 | 0,0 | 0,0 | 0,0 | 0,0  | 0,0  | 0,0  | 0,0 | 0,0 | 0,4 | 0,0 | 0,0 | 0,4 | 0,0 | 0,0 | 0,0 | 0,0 | 0,0 | 0,0 |
| Glaphyrocysta perforata               | 0,0  | 0,0 | 0,0 | 0,0 | 0,0 | 0,0 | 0,0 | 0,0 | 0,0  | 8,7  | 0,0  | 0,0 | 0,0 | 0,0 | 0,5 | 0,0 | 0,0 | 0,0 | 0,0 | 0,0 | 0,0 | 0,0 | 0,0 |
| Glaphyrocysta semitecta               | 0,0  | 0,0 | 0,4 | 0,0 | 0,0 | 0,0 | 0,0 | 0,0 | 0,0  | 0,7  | 12,5 | 0,0 | 0,0 | 0,0 | 0,0 | 0,0 | 0,0 | 0,0 | 0,0 | 0,0 | 0,0 | 0,0 | 0,0 |
| Gonyaulacysta?                        | 0,0  | 0,0 | 0,0 | 0,0 | 0,0 | 0,0 | 0,0 | 0,0 | 0,0  | 0,4  | 16,6 | 0,0 | 0,0 | 0,0 | 0,0 | 0,0 | 0,2 | 0,0 | 0,0 | 0,0 | 0,0 | 0,0 | 0,0 |
| Hafniasphaera septata                 | 0,0  | 0,0 | 0,0 | 0,0 | 0,0 | 0,0 | 0,0 | 0,0 | 0,0  | 0,0  | 15,7 | 0,0 | 0,0 | 0,0 | 0,4 | 0,0 | 0,0 | 0,0 | 0,0 | 0,0 | 0,0 | 0,0 | 0,0 |
| ?Heterosphaeridium                    | 0,0  | 0,0 | 0,4 | 0,0 | 0,0 | 0,0 | 0,0 | 0,0 | 0,0  | 0,0  | 11,2 | 0,0 | 0,0 | 0,0 | 0,0 | 0,0 | 0,0 | 0,0 | 0,0 | 0,0 | 0,0 | 0,7 | 0,4 |
| Hexagonifera perforata                | 0,0  | 0,0 | 0,5 | 0,0 | 0,9 | 0,0 | 0,0 | 0,0 | 0,0  | 0,7  | 9,7  | 0,0 | 0,0 | 0,0 | 0,0 | 0,0 | 0,0 | 0,0 | 0,0 | 0,0 | 0,0 | 0,0 | 0,0 |
| "homotrybilium"                       | 0,0  | 0,0 | 0,0 | 0,0 | 0,0 | 0,0 | 0,0 | 0,0 | 0,0  | 0,0  | 11,0 | 0,0 | 0,0 | 0,0 | 0,0 | 0,0 | 0,0 | 0,0 | 0,0 | 0,0 | 0,0 | 0,0 | 0,0 |
| Hystrichokolpoma bulbosum             | 0,0  | 0,0 | 0,0 | 0,0 | 0,4 | 0,0 | 0,0 | 0,4 | 0,4  | 8,3  | 0,0  | 0,0 | 0,0 | 0,0 | 0,0 | 0,0 | 0,0 | 0,0 | 0,0 | 0,0 | 0,0 | 0,0 | 0,0 |
| Hystrichosphaeridium duplum           | 0,0  | 0,5 | 0,0 | 0,0 | 0,0 | 0,2 | 0,0 | 0,0 | 0,0  | 10,7 | 0,0  | 0,0 | 0,2 | 0,0 | 0,0 | 0,0 | 0,0 | 0,0 | 0,0 | 0,0 | 0,0 | 0,0 | 0,0 |
| Hystrichosphaeridium tubiferum        | 0,0  | 0,0 | 0,0 | 0,0 | 0,0 | 0,0 | 0,0 | 0,0 | 11,4 | 0,0  | 0,0  | 0,0 | 0,0 | 0,0 | 0,0 | 1,1 | 0,0 | 0,0 | 0,0 | 0,0 | 0,0 | 0,0 | 0,0 |
| Hystrichosphaeropsis sp. Undiff.      | 0,4  | 0,0 | 0,4 | 1,0 | 0,0 | 0,0 | 0,0 | 0,4 | 1,0  | 4,2  | 0,0  | 0,0 | 0,0 | 0,0 | 0,0 | 0,0 | 0,0 | 0,0 | 0,0 | 0,0 | 0,0 | 0,0 | 0,0 |
| Hystrichostrogylon sp.                | 0,4  | 0,7 | 0,4 | 0,0 | 0,0 | 0,0 | 0,0 | 0,4 | 0,0  | 3,1  | 0,0  | 0,0 | 0,0 | 0,0 | 0,0 | 0,0 | 0,0 | 0,0 | 0,0 | 0,0 | 0,0 | 0,4 | 0,4 |
| Impagidinium sp.                      | 0,4  | 0,0 | 1,3 | 0,0 | 0,4 | 0,0 | 0,0 | 0,0 | 0,0  | 0,9  | 0,0  | 0,0 | 0,0 | 0,4 | 0,0 | 0,0 | 0,0 | 0,0 | 0,0 | 0,0 | 0,0 | 0,0 | 0,0 |
| Impagidinium/Pterodinium cpx          | 0,9  | 0,9 | 0,0 | 0,0 | 0,0 | 0,0 | 0,0 | 0,0 | 0,2  | 0,5  | 0,0  | 0,0 | 0,0 | 0,0 | 0,0 | 0,0 | 0,0 | 0,0 | 0,0 | 0,0 | 0,0 | 0,5 | 0,5 |
| Isabelladinium cretaceum              | 0,4  | 4,7 | 2,2 | 0,0 | 0,0 | 0,0 | 0,0 | 0,0 | 0,0  | 1,2  | 0,0  | 0,0 | 0,0 | 0,0 | 0,0 | 0,0 | 0,4 | 0,0 | 0,0 | 0,4 | 0,0 | 0,0 | 1,2 |
| Isabelladinium sp.                    | 0,0  | 4,9 | 1,8 | 0,4 | 0,0 | 0,0 | 0,0 | 0,0 | 0,0  | 0,2  | 0,0  | 0,0 | 0,0 | 0,0 | 0,0 | 0,0 | 0,4 | 0,0 | 0,4 | 0,0 | 0,0 | 0,0 | 0,4 |
| Kallosphaeridium?                     | 0,6  | 0,4 | 2,6 | 0,0 | 0,0 | 0,0 | 0,0 | 0,0 | 0,4  | 1,7  | 0,0  | 0,0 | 0,0 | 0,0 | 0,0 | 0,0 | 0,0 | 0,0 | 0,0 | 0,0 | 0,0 | 0,0 | 0,0 |
| Kenlya nuda                           | 0,0  | 0,8 | 1,4 | 0,4 | 0,0 | 0,0 | 0,0 | 0,0 | 0,0  | 2,9  | 0,0  | 0,0 | 0,4 | 0,0 | 0,0 | 0,0 | 0,0 | 0,0 | 0,0 | 0,0 | 0,0 | 0,0 | 0,0 |
| Laciniadinium sp.                     | 1,7  | 0,0 | 0,4 | 0,0 | 0,4 | 0,0 | 0,0 | 0,0 | 0,4  | 4,2  | 0,0  | 0,0 | 0,0 | 0,0 | 0,0 | 0,0 | 0,0 | 0,0 | 0,0 | 0,0 | 0,0 | 0,0 | 0,0 |
| Lanternosphaeridium lanosum           | 0,0  | 0,0 | 7,0 | 0,4 | 0,0 | 0,0 | 0,0 | 0,0 | 0,4  | 1,1  | 0,4  | 0,0 | 0,4 | 0,0 | 0,0 | 0,0 | 0,0 | 0,0 | 0,0 | 0,0 | 0,0 | 0,0 | 0,0 |
| Lanternosphaeridium lanosum "reduced" | 2,6  | 2,6 | 1,8 | 0,0 | 0,4 | 0,9 | 0,0 | 0,4 | 0,0  | 3,7  | 0,0  | 0,0 | 0,0 | 0,0 | 0,0 | 0,0 | 0,0 | 0,0 | 0,0 | 0,0 | 0,0 | 0,0 | 0,0 |
|                                       | 15,4 | 0,0 | 2,4 | 0,0 | 0,0 | 0,0 | 0,0 | 0,0 | 0,4  | 2,8  | 0,4  | 0,0 | 0,0 | 0,4 | 0,4 | 0,4 | 0,0 | 0,0 | 0,0 | 0,0 | 0,0 | 0,0 | 0,0 |
|                                       | 0,0  | 0,0 | 0,0 | 0,0 | 0,0 | 0,0 | 0,0 | 0,0 | 0,0  | 4,3  | 0,8  | 0,4 | 0,0 | 2,0 | 0,4 | 0,0 | 0,0 | 0,0 | 0,4 | 0,0 | 0,0 | 0,0 | 0,0 |
|                                       | 10,5 | 1,3 | 0,0 | 0,0 | 0,0 | 0,0 | 0,4 | 0,0 | 0,0  | 3,6  | 0,4  | 0,0 | 0,4 | 2,9 | 3,3 | 0,0 | 0,0 | 0,0 | 0,0 | 0,0 | 0,0 | 0,0 | 0,0 |
|                                       | 1,1  | 0,4 | 0,0 | 0,4 | 0,0 | 0,0 | 0,4 | 0,0 | 0,0  | 7,0  | 0,4  | 0,0 | 0,0 | 0,0 | 1,9 | 0,0 | 0,0 | 0,0 | 0,8 | 0,0 | 0,0 | 0,0 | 0,0 |
|                                       | 0,0  | 0,0 | 0,9 | 0,0 | 0,0 | 0,0 | 0,0 | 0,0 | 0,4  | 14,9 | 0,0  | 0,0 | 0,0 | 0,9 | 4,7 | 0,0 | 0,0 | 0,0 | 0,0 | 0,0 | 0,0 | 0,0 | 0,0 |
|                                       | 1,1  | 0,0 | 0,0 | 0,4 | 0,0 | 0,4 | 0,0 | 0,0 | 0,0  | 8,8  | 0,4  | 0,0 | 0,0 | 0,0 | 0,6 | 0,0 | 0,0 | 0,0 | 0,7 | 0,0 | 0,0 | 0,0 | 0,0 |
|                                       | 0,4  | 0,4 | 1,8 | 0,0 | 0,0 | 0,0 | 0,0 | 0,0 | 0,0  | 1,8  | 0,0  | 0,0 | 0,0 | 0,7 | 0,7 | 0,0 | 0,0 | 0,0 | 0,4 | 0,0 | 0,0 | 0,0 | 0,0 |

|                                   |     |     |     |     |     |     |     |     |     |     |     |     |     |     |     |     |      |     |      |      |     |     |
|-----------------------------------|-----|-----|-----|-----|-----|-----|-----|-----|-----|-----|-----|-----|-----|-----|-----|-----|------|-----|------|------|-----|-----|
| Leberidocysta chlamydata          | 0,0 | 0,0 | 0,4 | 0,4 | 0,0 | 0,0 | 4,4 | 0,0 | 0,0 | 0,0 | 1,3 | 0,0 | 0,8 | 0,0 | 0,0 | 0,0 | 4,2  | 0,0 | 6,5  | 11,7 | 0,0 | 0,0 |
| Lejeunecysta globosa              | 0,0 | 0,0 | 0,0 | 0,0 | 0,0 | 0,0 | 2,3 | 0,0 | 0,0 | 0,0 | 0,9 | 0,0 | 0,0 | 0,0 | 0,0 | 0,0 | 1,1  | 0,0 | 11,0 | 3,2  | 0,5 | 0,0 |
| Lejeunecysta sp.                  | 0,0 | 0,0 | 0,0 | 0,4 | 0,0 | 0,0 | 4,3 | 0,0 | 0,0 | 0,7 | 0,0 | 0,0 | 0,4 | 0,7 | 0,0 | 0,0 | 0,0  | 0,0 | 4,5  | 13,4 | 0,4 | 0,0 |
| ?Lithosphaeridium sp.             | 0,0 | 0,0 | 0,0 | 0,0 | 0,0 | 0,0 | 3,5 | 0,0 | 0,0 | 0,4 | 0,4 | 0,0 | 2,0 | 0,4 | 0,0 | 0,0 | 1,7  | 0,0 | 9,4  | 4,8  | 0,0 | 0,0 |
| Manumiella seelandica             | 0,0 | 0,0 | 0,0 | 0,0 | 0,0 | 0,0 | 0,9 | 0,0 | 0,0 | 0,4 | 1,3 | 0,0 | 0,0 | 0,4 | 0,0 | 0,0 | 0,0  | 0,0 | 3,8  | 16,0 | 0,0 | 0,0 |
| Membraniamacia tenella            | 0,0 | 0,9 | 1,3 | 0,0 | 0,0 | 0,0 | 5,5 | 0,0 | 0,0 | 0,4 | 0,9 | 0,4 | 0,9 | 0,9 | 0,0 | 0,0 | 0,0  | 0,0 | 5,5  | 22,6 | 1,3 | 0,0 |
| Microdinium inornatum             | 0,5 | 0,0 | 0,5 | 0,0 | 0,5 | 0,5 | 6,8 | 0,0 | 0,0 | 0,5 | 0,0 | 0,0 | 1,4 | 0,0 | 0,0 | 0,0 | 0,0  | 0,0 | 7,9  | 15,4 | 0,0 | 0,0 |
| Neorhithidium? perforatum         | 0,0 | 0,0 | 0,0 | 0,0 | 0,9 | 3,9 | 0,0 | 0,0 | 0,0 | 0,0 | 0,9 | 0,0 | 0,0 | 0,0 | 0,0 | 0,0 | 0,0  | 0,0 | 6,1  | 11,2 | 0,2 | 0,4 |
| Odontochitina spp.                | 0,0 | 0,0 | 0,4 | 0,0 | 0,0 | 0,0 | 2,1 | 0,0 | 0,0 | 0,8 | 2,1 | 0,0 | 0,0 | 0,0 | 0,0 | 0,0 | 0,0  | 0,0 | 2,9  | 23,6 | 0,0 | 0,0 |
| Oligosphaeridium                  | 0,0 | 0,0 | 0,0 | 0,0 | 0,0 | 0,2 | 3,8 | 0,5 | 0,0 | 0,5 | 3,1 | 0,0 | 0,0 | 0,0 | 0,0 | 0,0 | 1,4  | 0,0 | 0,5  | 2,9  | 0,0 | 0,0 |
| Operculodinium sp.                | 0,0 | 0,0 | 0,0 | 0,0 | 0,0 | 2,2 | 0,0 | 0,0 | 0,0 | 0,0 | 0,5 | 0,0 | 0,0 | 0,0 | 0,0 | 0,0 | 0,3  | 0,0 | 0,0  | 8,4  | 0,0 | 0,0 |
| Palaeocystodinium australinum     | 0,0 | 0,0 | 0,0 | 0,0 | 0,4 | 0,0 | 5,9 | 0,0 | 0,0 | 0,0 | 0,0 | 0,0 | 0,4 | 0,4 | 0,0 | 0,0 | 1,0  | 0,0 | 13,9 | 6,5  | 0,0 | 0,0 |
| Palaeocystodinium golzowense      | 0,0 | 0,4 | 1,3 | 0,0 | 0,2 | 0,0 | 3,9 | 0,0 | 0,0 | 0,0 | 0,9 | 0,0 | 0,0 | 0,4 | 0,0 | 0,0 | 0,0  | 0,0 | 9,6  | 29,2 | 0,9 | 0,0 |
| Palaeocystodinium indet.          | 0,0 | 0,0 | 0,0 | 0,0 | 0,4 | 0,0 | 1,3 | 0,0 | 0,0 | 0,0 | 0,0 | 0,0 | 0,0 | 0,0 | 0,0 | 0,0 | 0,4  | 0,0 | 2,4  | 56,6 | 0,0 | 0,0 |
| Palaeohystrichophora infusoroides | 0,0 | 0,0 | 0,5 | 0,0 | 0,0 | 0,0 | 1,4 | 0,0 | 0,0 | 0,0 | 0,0 | 0,0 | 0,0 | 0,0 | 0,0 | 0,0 | 0,0  | 0,0 | 20,1 | 57,2 | 0,5 | 0,0 |
| Palaeoperidinium cf. cretaceum    | 0,0 | 0,0 | 0,0 | 0,0 | 0,8 | 0,0 | 0,4 | 0,0 | 0,0 | 0,0 | 0,0 | 0,2 | 0,0 | 0,0 | 0,0 | 0,6 | 0,0  | 0,0 | 13,0 | 27,7 | 0,0 | 0,0 |
| Palaeoperidinium pyrophorum       | 0,0 | 0,0 | 0,0 | 0,0 | 0,4 | 0,4 | 0,0 | 0,0 | 0,0 | 0,0 | 0,9 | 0,0 | 0,0 | 0,0 | 0,0 | 0,2 | 0,0  | 0,0 | 4,0  | 32,1 | 0,0 | 0,0 |
| Paleotetradinium silicorum        | 0,0 | 0,4 | 0,0 | 0,0 | 0,4 | 0,0 | 1,7 | 0,0 | 0,0 | 0,0 | 0,4 | 0,0 | 0,0 | 0,0 | 0,0 | 0,0 | 0,0  | 0,0 | 4,3  | 32,6 | 0,0 | 0,0 |
| Palynodinium cf. gallator         | 0,0 | 0,0 | 0,0 | 0,4 | 0,0 | 0,0 | 1,9 | 0,0 | 0,0 | 0,0 | 1,6 | 0,4 | 0,0 | 0,4 | 0,0 | 0,4 | 0,0  | 0,0 | 8,1  | 34,3 | 0,0 | 0,0 |
| Palynodinium gallator             | 0,0 | 0,0 | 0,0 | 0,0 | 0,0 | 0,0 | 1,3 | 0,0 | 0,0 | 0,4 | 0,8 | 0,0 | 0,0 | 0,0 | 0,0 | 0,0 | 0,0  | 0,0 | 1,3  | 9,9  | 0,0 | 0,0 |
| Peridinioid sp. 1                 | 0,0 | 0,0 | 0,0 | 1,1 | 0,0 | 0,0 | 1,3 | 0,4 | 0,0 | 2,2 | 3,1 | 0,7 | 0,4 | 0,4 | 0,0 | 0,0 | 0,0  | 0,0 | 0,0  | 2,8  | 0,0 | 0,4 |
| Phanerodinium sp.                 | 0,0 | 0,4 | 0,4 | 0,4 | 0,0 | 0,0 | 0,9 | 0,0 | 0,4 | 0,0 | 0,9 | 0,0 | 0,0 | 0,9 | 0,0 | 0,0 | 1,3  | 0,0 | 0,9  | 1,1  | 0,0 | 0,0 |
|                                   | 0,4 | 1,0 | 0,4 | 0,8 | 0,0 | 0,0 | 3,2 | 0,8 | 0,0 | 0,4 | 0,0 | 1,8 | 2,8 | 0,0 | 0,0 | 0,4 | 7,9  | 0,0 | 0,0  | 3,0  | 0,0 | 0,4 |
|                                   | 1,2 | 0,0 | 0,0 | 0,0 | 0,0 | 0,0 | 2,3 | 0,4 | 0,0 | 0,4 | 1,6 | 0,4 | 0,4 | 0,8 | 0,0 | 0,0 | 4,1  | 0,8 | 0,0  | 3,3  | 0,0 | 1,6 |
|                                   | 0,4 | 1,0 | 0,0 | 0,6 | 0,0 | 0,0 | 0,0 | 0,8 | 0,0 | 0,8 | 0,8 | 0,6 | 0,0 | 0,0 | 0,0 | 0,4 | 3,1  | 0,0 | 0,0  | 0,8  | 0,0 | 0,4 |
|                                   | 0,0 | 0,4 | 0,0 | 0,4 | 0,0 | 0,0 | 0,0 | 0,8 | 0,0 | 0,0 | 0,4 | 0,0 | 0,0 | 0,4 | 0,0 | 0,0 | 10,9 | 0,0 | 0,0  | 0,0  | 0,0 | 0,8 |
|                                   | 0,0 | 1,7 | 0,0 | 0,4 | 0,0 | 0,0 | 1,7 | 0,0 | 0,0 | 0,9 | 0,9 | 6,0 | 0,0 | 0,0 | 0,0 | 0,4 | 1,1  | 0,0 | 1,3  | 0,0  | 0,0 | 0,0 |
|                                   | 0,0 | 0,0 | 0,0 | 0,0 | 0,0 | 0,4 | 0,4 | 0,0 | 0,0 | 0,0 | 0,7 | 0,0 | 0,0 | 0,6 | 0,0 | 0,0 | 1,1  | 0,0 | 0,0  | 0,4  | 0,0 | 0,7 |
|                                   | 0,0 | 1,1 | 0,0 | 0,4 | 0,0 | 0,0 | 0,0 | 0,0 | 0,0 | 1,1 | 0,0 | 3,7 | 0,4 | 0,0 | 0,0 | 0,0 | 8,5  | 0,0 | 0,7  | 0,0  | 0,0 | 0,0 |

|                              |     |     |     |     |     |     |     |     |     |     |     |     |     |     |     |     |      |     |     |     |      |      |
|------------------------------|-----|-----|-----|-----|-----|-----|-----|-----|-----|-----|-----|-----|-----|-----|-----|-----|------|-----|-----|-----|------|------|
| Phelodinium magnificum       | 0,4 | 0,0 | 0,4 | 0,4 | 1,5 | 0,0 | 0,0 | 0,8 | 0,0 | 0,0 | 0,0 | 1,5 | 0,4 | 0,0 | 0,4 | 0,0 | 2,1  | 1,3 | 0,0 | 0,0 | 8,8  | 0,4  |
| Phelodinium tricuspidis      | 0,0 | 0,0 | 0,0 | 0,0 | 0,0 | 0,0 | 0,0 | 0,9 | 0,9 | 0,0 | 0,9 | 0,5 | 1,6 | 0,0 | 0,5 | 0,0 | 0,0  | 0,0 | 0,0 | 4,3 | 0,0  |      |
| Phthanoperidinium sp.        | 0,0 | 0,2 | 0,0 | 1,3 | 1,3 | 0,0 | 0,0 | 0,0 | 0,0 | 0,0 | 0,0 | 3,1 | 0,9 | 0,0 | 2,0 | 0,0 | 2,2  | 1,6 | 0,0 | 0,0 | 14,5 | 0,9  |
| Pierceites pentagonia        | 0,2 | 0,0 | 0,0 | 0,0 | 0,0 | 0,0 | 2,8 | 0,4 | 0,0 | 0,0 | 0,0 | 1,7 | 0,7 | 0,0 | 0,7 | 0,0 | 1,3  | 0,0 | 0,0 | 0,0 | 5,0  | 7,6  |
| Pyxidiniopsis sp.            | 0,0 | 0,0 | 0,0 | 0,4 | 0,0 | 0,9 | 0,0 | 0,4 | 0,0 | 0,0 | 0,0 | 0,9 | 0,9 | 0,0 | 0,4 | 0,0 | 0,4  | 0,4 | 0,0 | 0,0 | 5,3  | 0,0  |
| Renidinium gracile           | 0,0 | 0,0 | 0,0 | 0,4 | 0,0 | 0,0 | 0,0 | 0,9 | 0,0 | 0,0 | 0,0 | 3,9 | 2,0 | 0,0 | 1,3 | 0,0 | 2,2  | 1,5 | 0,0 | 0,0 | 9,9  | 0,4  |
| Riculacysta perforata        | 0,0 | 0,0 | 0,0 | 0,9 | 0,5 | 0,0 | 0,9 | 0,5 | 0,0 | 0,0 | 0,0 | 0,9 | 0,0 | 0,0 | 1,8 | 0,0 | 0,5  | 0,5 | 0,0 | 0,0 | 8,4  | 10,4 |
| Senegalinium bicavatum       | 0,0 | 0,0 | 0,0 | 0,9 | 0,9 | 0,4 | 0,4 | 0,0 | 0,0 | 0,0 | 0,0 | 0,0 | 0,0 | 0,0 | 1,1 | 0,0 | 1,3  | 0,0 | 0,0 | 0,0 | 8,1  | 4,4  |
| Senegalinium? dilwynense     | 0,0 | 0,0 | 0,0 | 0,0 | 0,0 | 0,0 | 0,0 | 0,8 | 0,0 | 0,0 | 0,4 | 1,7 | 0,0 | 1,2 | 0,0 | 0,6 | 0,0  | 1,9 | 0,8 | 0,0 | 10,3 | 1,2  |
| Senegalinium microgranulatum | 0,0 | 0,0 | 0,0 | 0,5 | 1,0 | 0,5 | 1,4 | 1,4 | 0,0 | 1,0 | 0,0 | 0,0 | 0,0 | 0,0 | 1,0 | 0,5 | 1,4  | 0,0 | 1,4 | 0,0 | 16,0 | 3,3  |
| Senegalinium obscurum        | 0,0 | 0,0 | 0,0 | 0,5 | 0,0 | 1,6 | 1,1 | 0,0 | 0,0 | 3,8 | 0,0 | 0,0 | 0,0 | 0,0 | 0,0 | 0,0 | 0,0  | 0,0 | 0,5 | 0,0 | 10,3 | 2,2  |
| Senegalinium spp. Undiff.    | 0,4 | 0,0 | 0,0 | 0,8 | 1,6 | 0,0 | 1,2 | 0,4 | 0,0 | 0,0 | 1,6 | 0,0 | 0,0 | 0,0 | 1,2 | 0,0 | 1,2  | 0,8 | 0,0 | 0,0 | 13,7 | 1,6  |
| Senoniasphaera inornata      | 0,4 | 0,7 | 0,0 | 0,4 | 0,4 | 0,0 | 0,0 | 0,0 | 0,0 | 0,0 | 2,2 | 0,0 | 0,0 | 0,0 | 0,0 | 0,0 | 4,8  | 0,9 | 0,0 | 0,0 | 10,7 | 0,9  |
| Senoniasphaera cf. inornata  | 0,0 | 0,0 | 0,0 | 2,6 | 0,0 | 0,0 | 0,0 | 0,4 | 0,0 | 0,0 | 0,9 | 0,0 | 0,0 | 0,0 | 0,0 | 0,0 | 1,3  | 0,0 | 0,4 | 0,0 | 6,7  | 0,4  |
| Senoniasphaera protrusa      | 0,0 | 0,5 | 0,0 | 0,0 | 0,0 | 0,0 | 0,0 | 0,5 | 0,0 | 0,0 | 0,5 | 0,0 | 0,0 | 0,0 | 0,0 | 0,0 | 0,5  | 0,0 | 0,0 | 0,0 | 4,1  | 0,0  |
| Senoniasphaera rotundata     | 0,0 | 0,4 | 0,0 | 0,4 | 0,4 | 0,0 | 0,0 | 1,2 | 0,0 | 0,0 | 0,0 | 0,0 | 0,0 | 0,0 | 0,0 | 0,0 | 0,4  | 0,0 | 0,0 | 0,0 | 6,9  | 0,0  |
| small peridinioid sp. 1      | 0,4 | 0,0 | 0,0 | 0,0 | 0,2 | 0,0 | 0,0 | 2,2 | 0,0 | 0,0 | 0,0 | 0,0 | 0,0 | 0,0 | 0,0 | 0,0 | 0,4  | 0,0 | 0,0 | 0,0 | 13,7 | 0,0  |
| Spinidinium sp.              | 0,4 | 0,0 | 0,0 | 1,3 | 0,0 | 0,4 | 0,0 | 4,3 | 1,3 | 0,0 | 0,9 | 0,4 | 0,0 | 0,0 | 0,0 | 0,0 | 0,4  | 0,0 | 0,0 | 0,0 | 15,3 | 0,0  |
| Spinidinium densispinatum    | 0,0 | 0,0 | 0,0 | 1,2 | 0,0 | 0,0 | 0,0 | 1,6 | 0,0 | 0,0 | 0,0 | 1,2 | 0,0 | 0,0 | 0,0 | 0,0 | 0,8  | 0,0 | 0,0 | 0,0 | 26,9 | 0,0  |
| Spiniferella cornuta         | 0,0 | 0,4 | 0,0 | 0,8 | 0,0 | 0,0 | 0,0 | 3,0 | 0,0 | 0,0 | 0,8 | 1,7 | 0,0 | 0,0 | 0,0 | 0,0 | 1,3  | 0,0 | 0,0 | 0,0 | 16,2 | 0,0  |
| Spiniferites ramosus cpx.    | 0,4 | 0,4 | 0,0 | 1,3 | 0,0 | 0,0 | 0,0 | 0,4 | 0,0 | 0,0 | 0,0 | 3,1 | 0,0 | 0,0 | 0,0 | 0,0 | 11,6 | 0,0 | 0,0 | 0,0 | 26,9 | 0,0  |
| Spiniferites sp. 1           | 0,0 | 0,0 | 0,0 | 0,0 | 0,4 | 0,0 | 0,0 | 3,5 | 1,3 | 0,9 | 0,0 | 9,7 | 0,0 | 0,0 | 0,0 | 0,0 | 1,3  | 0,0 | 0,0 | 0,0 | 20,7 | 0,0  |
|                              | 0,0 | 0,8 | 0,0 | 0,0 | 0,0 | 0,0 | 0,0 | 1,6 | 0,0 | 0,0 | 0,0 | 2,4 | 0,0 | 0,0 | 0,0 | 0,0 | 1,2  | 0,6 | 0,0 | 0,0 | 20,8 | 0,0  |
|                              | 0,0 | 0,4 | 0,0 | 0,0 | 0,0 | 0,0 | 0,0 | 2,3 | 0,8 | 0,8 | 0,0 | 1,6 | 0,0 | 0,0 | 0,0 | 0,0 | 0,4  | 0,4 | 0,0 | 0,0 | 18,8 | 0,0  |
|                              | 0,0 | 0,0 | 0,4 | 0,0 | 0,6 | 0,0 | 0,0 | 3,3 | 0,0 | 0,0 | 0,0 | 1,7 | 0,0 | 0,0 | 0,0 | 0,0 | 0,4  | 0,4 | 0,0 | 0,0 | 24,3 | 0,0  |
|                              | 0,0 | 0,4 | 0,0 | 0,0 | 0,4 | 0,0 | 0,0 | 0,4 | 0,0 | 0,0 | 1,5 | 1,5 | 0,0 | 0,0 | 0,4 | 0,0 | 0,8  | 0,4 | 0,0 | 0,0 | 9,0  | 0,0  |
|                              | 0,9 | 0,0 | 0,0 | 0,0 | 0,9 | 0,0 | 0,0 | 0,0 | 0,0 | 0,0 | 0,0 | 3,4 | 0,0 | 0,0 | 0,0 | 0,0 | 0,0  | 1,3 | 0,0 | 0,0 | 23,7 | 0,0  |
|                              | 0,6 | 0,0 | 0,0 | 0,7 | 0,0 | 0,0 | 0,0 | 3,2 | 1,5 | 0,0 | 0,4 | 4,5 | 0,0 | 0,0 | 0,0 | 0,0 | 1,1  | 0,0 | 0,0 | 0,0 | 19,0 | 0,4  |
|                              | 0,0 | 0,4 | 0,4 | 0,0 | 0,4 | 0,0 | 0,4 | 0,0 | 0,4 | 0,0 | 0,0 | 4,0 | 0,0 | 0,0 | 0,0 | 0,4 | 0,4  | 0,0 | 0,0 | 0,0 | 11,2 | 0,0  |

|                                                               |     |     |     |     |     |     |     |     |     |     |      |     |      |     |     |     |     |     |
|---------------------------------------------------------------|-----|-----|-----|-----|-----|-----|-----|-----|-----|-----|------|-----|------|-----|-----|-----|-----|-----|
| Spongodinium delitiense                                       | 0,6 | 0,0 | 0,0 | 0,4 | 0,0 | 0,0 | 0,0 | 1,3 | 0,0 | 0,0 | 0,0  | 2,5 | 10,6 | 1,9 | 5,5 | 0,6 | 0,0 | 0,0 |
| Spumadinium sp. cf. Spumadinium sp. of Brinkhuis et al., 2000 | 0,9 | 0,0 | 0,0 | 0,0 | 0,0 | 0,0 | 0,0 | 4,1 | 0,0 | 0,0 | 14,2 | 1,8 | 0,5  | 0,7 | 3,6 | 0,3 | 0,0 | 0,0 |
| Surculosphaeridium sp.                                        | 0,9 | 0,0 | 0,0 | 0,0 | 0,0 | 0,0 | 0,0 | 1,8 | 0,0 | 0,0 | 0,0  | 2,5 | 6,7  | 0,0 | 4,0 | 0,0 | 0,0 | 0,0 |
| Tanyosphaeridium xanthiopyxides                               | 0,0 | 0,0 | 0,0 | 0,2 | 0,0 | 0,0 | 0,0 | 2,6 | 0,0 | 0,0 | 0,0  | 3,7 | 14,6 | 3,4 | 1,8 | 0,6 | 0,0 | 0,0 |
| Thalassiphora ?bononiensis                                    | 5,5 | 0,0 | 0,0 | 0,0 | 0,0 | 0,4 | 0,0 | 6,2 | 0,0 | 0,0 | 11,1 | 1,3 | 6,0  | 4,6 | 2,6 | 1,2 | 0,0 | 0,0 |
| Thalassiphora patula                                          | 0,0 | 0,0 | 0,0 | 0,4 | 0,0 | 0,0 | 0,0 | 0,9 | 0,0 | 0,0 | 0,0  | 1,3 | 6,6  | 0,0 | 3,3 | 0,3 | 0,0 | 0,0 |
| Trigonpyxidium sp.                                            | 0,0 | 0,0 | 0,0 | 0,0 | 0,0 | 0,0 | 0,0 | 2,0 | 0,0 | 0,0 | 0,0  | 0,2 | 5,4  | 3,6 | 3,9 | 0,0 | 0,0 | 0,0 |
| Trithyrodinium evittii                                        | 0,0 | 0,0 | 0,0 | 0,0 | 0,0 | 0,0 | 0,0 | 1,1 | 0,0 | 0,0 | 7,9  | 1,8 | 13,2 | 1,5 | 3,0 | 0,6 | 0,0 | 0,0 |
| ?Trithyrodinium sp.                                           | 5,6 | 0,0 | 0,0 | 0,0 | 0,0 | 0,0 | 0,0 | 3,5 | 0,0 | 0,0 | 7,0  | 2,1 | 4,8  | 3,5 | 2,4 | 0,5 | 0,0 | 0,0 |
| Turbiosphaera filosa                                          | 0,2 | 0,0 | 0,0 | 0,0 | 0,0 | 0,0 | 0,0 | 1,0 | 0,0 | 0,0 | 12,9 | 2,4 | 5,5  | 2,0 | 3,4 | 1,4 | 0,0 | 0,0 |
|                                                               | 0,5 | 0,0 | 0,0 | 0,0 | 0,0 | 0,0 | 0,0 | 0,8 | 0,0 | 0,0 | 10,6 | 2,7 | 11,1 | 1,5 | 0,0 | 0,4 | 0,0 | 0,0 |
|                                                               | 0,0 | 0,0 | 0,0 | 0,2 | 0,0 | 0,0 | 0,0 | 1,0 | 0,6 | 0,0 | 0,0  | 2,8 | 10,1 | 2,2 | 2,8 | 0,3 | 0,0 | 0,0 |
|                                                               | 0,0 | 0,0 | 0,0 | 0,9 | 0,0 | 0,4 | 0,0 | 0,0 | 0,0 | 0,0 | 0,0  | 3,1 | 5,7  | 0,0 | 1,1 | 0,3 | 0,0 | 0,0 |
|                                                               | 0,0 | 0,0 | 0,0 | 0,4 | 0,0 | 0,0 | 0,0 | 3,5 | 0,0 | 0,0 | 4,1  | 5,0 | 1,3  | 3,8 | 0,6 | 0,9 | 0,0 | 0,0 |
|                                                               | 0,0 | 0,0 | 0,0 | 0,5 | 0,0 | 0,5 | 0,0 | 0,5 | 0,0 | 0,0 | 0,0  | 1,1 | 2,7  | 0,0 | 0,0 | 0,0 | 0,0 | 0,0 |
|                                                               | 0,0 | 0,0 | 0,0 | 0,0 | 0,0 | 0,2 | 0,0 | 0,4 | 0,0 | 0,0 | 0,0  | 1,2 | 4,0  | 0,0 | 0,0 | 0,3 | 0,0 | 0,0 |
|                                                               | 0,0 | 0,0 | 0,0 | 0,0 | 0,0 | 0,9 | 0,0 | 0,4 | 0,0 | 0,0 | 0,0  | 2,9 | 8,5  | 0,0 | 0,0 | 0,3 | 0,0 | 0,0 |
|                                                               | 0,0 | 0,0 | 0,0 | 1,3 | 0,0 | 0,0 | 0,0 | 0,4 | 0,0 | 0,0 | 6,0  | 2,4 | 0,9  | 5,3 | 8,6 | 1,2 | 0,0 | 0,0 |
|                                                               | 0,0 | 0,0 | 0,0 | 0,8 | 0,0 | 0,0 | 0,0 | 1,2 | 0,4 | 0,0 | 0,0  | 2,3 | 2,5  | 0,0 | 0,3 | 0,6 | 0,0 | 0,0 |
|                                                               | 0,0 | 0,0 | 0,0 | 1,7 | 0,0 | 0,0 | 0,0 | 4,2 | 0,0 | 0,0 | 6,5  | 4,4 | 0,4  | 5,6 | 0,0 | 1,6 | 0,0 | 0,0 |
|                                                               | 0,0 | 0,0 | 0,0 | 0,9 | 0,0 | 0,4 | 0,0 | 0,2 | 0,0 | 0,0 | 0,0  | 4,4 | 5,7  | 0,0 | 0,0 | 0,3 | 0,0 | 0,0 |
|                                                               | 0,0 | 0,0 | 0,4 | 1,5 | 0,0 | 0,9 | 0,0 | 0,0 | 0,0 | 0,4 | 7,7  | 5,9 | 3,3  | 5,6 | 1,6 | 0,3 | 0,0 | 0,0 |
|                                                               | 0,0 | 0,0 | 0,0 | 0,0 | 0,0 | 0,0 | 0,0 | 0,0 | 0,0 | 0,0 | 0,0  | 5,3 | 2,2  | 0,0 | 0,2 | 0,7 | 0,0 | 0,0 |
|                                                               | 0,0 | 3,9 | 0,4 | 1,6 | 0,4 | 0,0 | 0,4 | 5,9 | 0,0 | 0,0 | 3,3  | 5,9 | 1,2  | 3,4 | 1,2 | 0,2 | 0,0 | 0,0 |
|                                                               | 0,0 | 0,0 | 0,0 | 2,3 | 0,0 | 0,0 | 0,0 | 0,4 | 0,0 | 0,0 | 0,0  | 3,3 | 2,9  | 0,0 | 0,0 | 0,3 | 0,0 | 0,0 |
|                                                               | 0,0 | 1,5 | 0,0 | 2,3 | 0,4 | 0,0 | 0,0 | 3,6 | 0,0 | 0,4 | 6,2  | 2,1 | 2,8  | 1,3 | 3,3 | 0,0 | 0,0 | 0,0 |
|                                                               | 0,0 | 0,0 | 0,0 | 0,4 | 0,0 | 0,0 | 0,0 | 4,1 | 0,0 | 0,0 | 0,4  | 3,8 | 1,5  | 0,0 | 0,0 | 0,5 | 0,0 | 0,0 |
|                                                               | 0,0 | 6,0 | 0,0 | 0,4 | 0,0 | 0,0 | 0,0 | 2,2 | 0,0 | 0,0 | 6,7  | 5,6 | 2,1  | 3,5 | 2,6 | 1,1 | 0,9 | 0,7 |
|                                                               | 0,0 | 0,0 | 0,0 | 0,4 | 0,0 | 0,0 | 0,0 | 3,5 | 0,0 | 0,0 | 0,0  | 4,0 | 2,0  | 0,0 | 0,0 | 0,3 |     |     |
| Dinocyst indet                                                |     |     |     |     |     |     |     |     |     |     |      |     |      |     |     |     |     |     |
| P-cyst indet                                                  |     |     |     |     |     |     |     |     |     |     |      |     |      |     |     |     |     |     |
| G-cyst indet                                                  |     |     |     |     |     |     |     |     |     |     |      |     |      |     |     |     |     |     |
| Acritarch sp. 0 (smooth)                                      |     |     |     |     |     |     |     |     |     |     |      |     |      |     |     |     |     |     |
| Acritarch Reticulate                                          |     |     |     |     |     |     |     |     |     |     |      |     |      |     |     |     |     |     |
| Acritarch sp. 1 (spiny)                                       |     |     |     |     |     |     |     |     |     |     |      |     |      |     |     |     |     |     |
| Form A of Marheinecke 1986                                    |     |     |     |     |     |     |     |     |     |     |      |     |      |     |     |     |     |     |
| Form D of Marheinecke 1986                                    |     |     |     |     |     |     |     |     |     |     |      |     |      |     |     |     |     |     |

|                          |      |     |     |     |     |     |     |      |     |      |      |     |     |
|--------------------------|------|-----|-----|-----|-----|-----|-----|------|-----|------|------|-----|-----|
| Impletosphaeridium       |      |     |     |     |     |     |     |      |     |      |      |     |     |
| "Veryhachium"            |      |     |     |     |     |     |     |      |     |      |      |     |     |
| Foram linings >3         |      |     |     |     |     |     |     |      |     |      |      |     |     |
| Foram linings 3          |      |     |     |     |     |     |     |      |     |      |      |     |     |
| Foram linings 2          |      |     |     |     |     |     |     |      |     |      |      |     |     |
| Botryococcus             |      |     |     |     |     |     |     |      |     |      |      |     |     |
| freshwater algae indet.  |      |     |     |     |     |     |     |      |     |      |      |     |     |
| Palambages               |      |     |     |     |     |     |     |      |     |      |      |     |     |
| Paralecaniella indentata |      |     |     |     |     |     |     |      |     |      |      |     |     |
| Pterospermella           |      |     |     |     |     |     |     |      |     |      |      |     |     |
| Bisaccate pollen         |      |     |     |     |     |     |     |      |     |      |      |     |     |
| other pollen             |      |     |     |     |     |     |     |      |     |      |      |     |     |
| Trilete spores           |      |     |     |     |     |     |     |      |     |      |      |     |     |
| Monolete spores          |      |     |     |     |     |     |     |      |     |      |      |     |     |
| 0,0                      | 3,0  | 0,3 | 0,0 | 0,3 | 0,0 | 1,9 | 0,0 | 0,3  | 0,0 | 9,7  | 5,8  | 3,3 | 0,8 |
| 0,0                      | 2,3  | 1,0 | 0,3 | 0,3 | 0,0 | 0,0 | 0,0 | 1,6  | 0,7 | 7,3  | 6,9  | 2,9 | 0,7 |
| 0,0                      | 3,4  | 0,0 | 0,6 | 0,6 | 0,0 | 2,2 | 0,3 | 3,1  | 0,0 | 9,6  | 1,9  | 4,7 | 0,0 |
| 0,0                      | 1,5  | 1,5 | 0,6 | 0,3 | 0,0 | 0,0 | 0,0 | 5,2  | 0,0 | 7,2  | 1,5  | 4,6 | 1,8 |
| 0,0                      | 0,3  | 0,3 | 0,9 | 0,6 | 0,9 | 0,3 | 0,0 | 1,4  | 0,0 | 10,9 | 6,3  | 4,9 | 0,0 |
| 0,0                      | 3,0  | 0,0 | 1,2 | 1,2 | 0,6 | 1,8 | 0,0 | 2,1  | 0,0 | 7,7  | 3,3  | 6,4 | 0,0 |
| 0,0                      | 1,3  | 0,7 | 0,3 | 1,0 | 1,3 | 0,0 | 0,0 | 0,7  | 0,3 | 7,9  | 1,0  | 5,6 | 0,0 |
| 0,0                      | 1,2  | 0,6 | 0,6 | 0,0 | 0,6 | 0,0 | 0,0 | 3,7  | 0,0 | 13,4 | 2,4  | 2,4 | 0,3 |
| 0,3                      | 1,3  | 1,3 | 0,5 | 0,3 | 1,3 | 0,0 | 0,0 | 1,6  | 0,0 | 10,5 | 4,6  | 6,5 | 0,0 |
| 0,0                      | 0,8  | 0,6 | 0,8 | 0,3 | 1,7 | 0,0 | 0,0 | 8,2  | 0,0 | 14,8 | 3,7  | 2,8 | 0,3 |
| 0,0                      | 2,7  | 1,1 | 0,4 | 0,4 | 0,8 | 0,0 | 0,0 | 1,9  | 0,0 | 12,6 | 3,4  | 4,2 | 0,0 |
|                          | 1,4  | 1,1 | 0,8 | 1,9 | 0,6 | 0,8 | 0,0 | 0,8  | 0,0 | 11,5 | 1,7  | 3,1 | 0,8 |
|                          | 0,9  | 0,9 | 0,0 | 0,3 | 0,0 | 0,3 | 0,0 | 1,6  | 0,0 | 8,3  | 9,4  | 5,6 | 0,0 |
|                          | 0,3  | 0,3 | 0,0 | 0,6 | 0,0 | 0,0 | 0,0 | 2,8  | 0,0 | 9,1  | 3,8  | 4,7 | 0,3 |
|                          | 0,0  | 0,4 | 0,0 | 0,4 | 0,0 | 0,4 | 0,0 | 1,7  | 0,0 | 0,6  | 3,7  | 1,2 | 0,0 |
|                          | 0,0  | 1,3 | 0,3 | 0,0 | 0,0 | 0,0 | 0,0 | 1,3  | 0,3 | 5,2  | 5,5  | 4,5 | 0,0 |
| 0,0                      | 0,3  | 2,1 | 0,7 | 0,3 | 0,7 | 0,0 | 0,0 | 3,8  | 0,0 | 5,6  | 4,9  | 3,7 | 0,0 |
| 1,6                      | 0,5  | 1,2 | 0,5 | 0,5 | 0,2 | 0,0 | 0,0 | 1,2  | 0,0 | 7,9  | 16,0 | 1,6 | 0,0 |
|                          | 0,3  | 2,9 | 0,6 | 0,0 | 0,3 | 0,0 | 0,0 | 0,6  | 0,0 | 4,9  | 8,8  | 1,9 | 0,0 |
|                          | 0,0  | 2,1 | 0,8 | 1,1 | 0,0 | 0,3 | 0,0 | 1,1  | 0,0 | 11,1 | 8,8  | 4,3 | 0,0 |
|                          | 2,2  | 0,8 | 0,3 | 0,0 | 0,5 | 1,1 | 0,0 | 7,1  | 0,3 | 13,9 | 6,8  | 4,4 | 0,0 |
|                          | 0,3  | 0,0 | 0,3 | 0,3 | 0,0 | 0,0 | 0,0 | 4,0  | 0,0 | 12,8 | 9,7  | 3,2 | 0,0 |
| 0,0                      | 1,2  | 0,7 | 0,7 | 0,5 | 0,0 | 1,5 | 0,0 | 7,8  | 0,0 | 13,7 | 7,7  | 3,5 | 0,0 |
| 0,5                      | 1,0  | 2,0 | 1,0 | 0,5 | 0,5 | 0,0 | 0,0 | 5,4  | 0,0 | 11,3 | 6,4  | 4,2 | 0,0 |
| 0,0                      | 2,3  | 1,6 | 1,0 | 0,8 | 0,0 | 0,0 | 0,0 | 7,0  | 0,5 | 11,3 | 8,3  | 4,7 | 0,0 |
| 0,3                      | 1,0  | 0,3 | 0,0 | 0,0 | 0,8 | 0,0 | 0,0 | 4,0  | 0,0 | 12,4 | 6,5  | 3,8 | 0,3 |
| 0,0                      | 10,2 | 0,5 | 0,8 | 0,0 | 0,3 | 0,0 | 0,0 | 12,3 | 0,0 | 8,2  | 2,6  | 4,6 | 0,0 |
| 0,4                      | 7,9  | 0,7 | 0,0 | 0,0 | 0,4 | 0,0 | 0,0 | 2,0  | 0,0 | 13,7 | 4,4  | 3,1 | 0,2 |
|                          | 0,3  | 0,9 | 0,0 | 0,0 | 0,8 | 0,0 | 0,0 | 0,3  | 0,0 | 4,7  | 4,1  | 3,1 | 0,0 |

| Total # Dinocysts | Total # P-cysts | MORPHOGROUP Other dinocysts | MORPHOGROUP Peridinioids | MORPHOGROUP Areoligera cpx | MORPHOGROUP Hystrichosphaeridium | MORPHOGROUP Spiniferites | MORPHOGROUP Fibrous cribroperidinioids | MORPHOGROUP Palynodinium | MORPHOGROUP Manumiella |
|-------------------|-----------------|-----------------------------|--------------------------|----------------------------|----------------------------------|--------------------------|----------------------------------------|--------------------------|------------------------|
| 240               | 41,5            | 27,7                        | 16,9                     | 17,9                       | 5,0                              | 13,3                     | 1,0                                    | 18,1                     | 0,0                    |
| 219               | 25,5            | 21,5                        | 11,6                     | 37,2                       | 8,7                              | 5,0                      | 1,8                                    | 14,2                     | 0,0                    |
| 223,5             | 38              | 20,1                        | 16,6                     | 10,3                       | 13,9                             | 17,4                     | 3,8                                    | 17,9                     | 0,0                    |
| 229               | 34,5            | 25,8                        | 15,1                     | 10,5                       | 17,5                             | 15,1                     | 2,0                                    | 14,2                     | 0,0                    |
| 225,5             | 30              | 30,6                        | 13,3                     | 11,8                       | 16,2                             | 7,1                      | 1,3                                    | 19,7                     | 0,0                    |
| 228               | 39              | 18,9                        | 17,1                     | 8,6                        | 11,6                             | 12,9                     | 2,9                                    | 28,1                     | 0,0                    |
| 221               | 20,5            | 23,8                        | 8,8                      | 7,0                        | 10,9                             | 21,9                     | 3,8                                    | 23,3                     | 0,5                    |
| 228               | 12              | 34,2                        | 5,3                      | 15,6                       | 11,0                             | 14,9                     | 1,8                                    | 17,3                     | 0,0                    |
| 242               | 31,5            | 31,4                        | 13,0                     | 3,9                        | 9,5                              | 14,0                     | 1,7                                    | 26,4                     | 0,0                    |
| 210               | 27              | 32,6                        | 12,9                     | 15,0                       | 11,2                             | 24,0                     | 1,0                                    | 3,3                      | 0,0                    |
| 184,5             | 24              | 33,1                        | 13,0                     | 16,8                       | 11,4                             | 15,7                     | 1,6                                    | 8,4                      | 0,0                    |
| 252,5             | 34,5            | 30,3                        | 13,3                     | 11,1                       | 5,1                              | 17,8                     | 1,6                                    | 20,4                     | 0,4                    |
| 228               | 41              | 15,8                        | 17,8                     | 2,6                        | 3,1                              | 15,6                     | 6,1                                    | 38,8                     | 0,2                    |
| 230,5             | 37,5            | 11,5                        | 15,8                     | 2,2                        | 0,9                              | 8,0                      | 2,2                                    | 59,0                     | 0,4                    |
| 221               | 11              | 5,7                         | 5,0                      | 2,7                        | 0,7                              | 4,5                      | 4,1                                    | 77,4                     | 0,0                    |
| 253               | 15,5            | 7,5                         | 5,3                      | 8,5                        | 1,2                              | 7,9                      | 28,1                                   | 40,7                     | 0,8                    |
| 222,5             | 20              | 13,0                        | 8,1                      | 8,5                        | 0,2                              | 15,3                     | 18,2                                   | 36,2                     | 0,4                    |
| 231,5             | 32              | 14,0                        | 13,4                     | 6,7                        | 2,2                              | 22,7                     | 3,7                                    | 36,9                     | 0,4                    |
| 258               | 31              | 9,5                         | 12,0                     | 3,5                        | 2,9                              | 26,9                     | 2,7                                    | 42,4                     | 0,0                    |
| 237               | 50              | 14,6                        | 20,3                     | 22,4                       | 5,1                              | 18,6                     | 8,0                                    | 11,2                     | 0,0                    |
| 229               | 66              | 21,4                        | 28,8                     | 11,8                       | 3,7                              | 27,7                     | 3,7                                    | 2,8                      | 0,0                    |
| 228               | 63              | 23,7                        | 27,7                     | 13,4                       | 3,7                              | 24,0                     | 5,5                                    | 2,0                      | 0,0                    |
| 253               | 82              | 13,4                        | 32,4                     | 21,9                       | 3,6                              | 24,1                     | 1,6                                    | 3,0                      | 0,0                    |
| 256               | 83              | 30,9                        | 30,3                     | 8,4                        | 4,7                              | 21,5                     | 0,8                                    | 3,3                      | 0,0                    |
| 239               | 48              | 17,4                        | 20,1                     | 23,4                       | 4,4                              | 26,8                     | 7,1                                    | 0,8                      | 0,0                    |
| 266               | 74              | 24,1                        | 28,2                     | 26,9                       | 7,0                              | 11,3                     | 2,4                                    | 0,0                      | 0,0                    |
| 235               | 74              | 11,1                        | 31,3                     | 12,6                       | 16,2                             | 25,4                     | 2,1                                    | 1,3                      | 0,0                    |
| 268               | 93              | 26,7                        | 31,5                     | 10,1                       | 8,8                              | 22,6                     | 0,0                                    | 0,4                      | 0,0                    |
| 272               | 83              | 7,9                         | 30,0                     | 44,1                       | 2,9                              | 11,6                     | 2,8                                    | 0,7                      | 0,0                    |

SI Table S3 – Fort Monmouth 3 dinoflagellate record (relative abundances)

| Code | Interval     | Average depth (ft.) | Average depth (m) | Distance from KTB (cm) | <i>Achilleodinium biannii</i> | <i>Achomosphaera sagena</i> | <i>Achomosphaera ramulifera</i> | <i>Andalusiella polymorpha</i> | <i>Apteodinium?</i> | <i>Areoligera senoniensis</i> | <i>Areoligera volata</i> | <i>Areoligera sp.</i> | <i>Carpatella cf. cornuta</i> | <i>Cerodinium diebellii</i> | <i>Cerodinium speciosum</i> | <i>Chytroisphaeridia "everricula" (Wilson, 1974)</i> |
|------|--------------|---------------------|-------------------|------------------------|-------------------------------|-----------------------------|---------------------------------|--------------------------------|---------------------|-------------------------------|--------------------------|-----------------------|-------------------------------|-----------------------------|-----------------------------|------------------------------------------------------|
| FT   | 49.5 - 49.6  | 49,55               | 1510,28           | 99,7                   | BARREN                        |                             |                                 |                                |                     |                               |                          |                       |                               |                             |                             |                                                      |
| FT   | 51.0 - 51.1  | 51,05               | 1556,00           | 54,0                   | 0,0                           | 0,2                         | 0,0                             | 0,0                            | 0,0                 | 3,4                           | 0,4                      | 3,2                   | 0,0                           | 0,0                         | 0,0                         | 0,0                                                  |
| FT   | 52.0 - 52.1  | 52,05               | 1586,48           | 23,5                   | 0,4                           | 0,0                         | 2,4                             | 0,0                            | 0,0                 | 2,2                           | 2,2                      | 3,0                   | 0,0                           | 0,0                         | 0,0                         | 0,0                                                  |
| FT   | 52.6 - 52.7  | 52,65               | 1604,77           | 5,2                    | 1,6                           | 0,4                         | 1,8                             | 0,0                            | 0,0                 | 1,4                           | 0,4                      | 1,8                   | 0,0                           | 0,0                         | 0,0                         | 0,0                                                  |
| FT   | 52.85 - 52.9 | 52,875              | 1611,63           | -1,6                   | 0,9                           | 0,0                         | 0,0                             | 0,0                            | 0,0                 | 0,0                           | 0,0                      | 0,0                   | 0,0                           | 0,0                         | 0,4                         | 0,0                                                  |
| FT   | 53.4 - 53.5  | 53,45               | 1629,16           | -19,2                  | 0,0                           | 0,0                         | 0,0                             | 0,0                            | 0,0                 | 0,0                           | 0,0                      | 0,0                   | 0,0                           | 0,4                         | 0,0                         | 0,0                                                  |
| FT   | 53.8 - 53.9  | 53,85               | 1641,35           | -31,3                  | 0,6                           | 0,4                         | 0,4                             | 0,0                            | 0,0                 | 0,0                           | 0,0                      | 0,0                   | 0,0                           | 0,0                         | 0,0                         | 0,0                                                  |
| FT   | 54.4 - 54.5  | 54,45               | 1659,64           | -49,6                  | 2,0                           | 0,4                         | 0,6                             | 0,0                            | 0,0                 | 0,0                           | 1,6                      | 1,6                   | 0,0                           | 0,0                         | 0,4                         | 0,0                                                  |
| FT   | 55.1 - 55.2  | 55,15               | 1680,97           | -71,0                  | 4,1                           | 1,3                         | 3,3                             | 0,0                            | 0,0                 | 0,0                           | 2,2                      | 3,7                   | 0,0                           | 0,4                         | 1,7                         | 0,0                                                  |
| FT   | 56.3 - 56.4  | 56,35               | 1717,55           | -107,5                 | 1,3                           | 0,0                         | 1,3                             | 0,2                            | 0,0                 | 0,4                           | 1,7                      | 3,4                   | 0,0                           | 0,0                         | 0,0                         | 0,0                                                  |
| FT   | 57.0 - 57.1  | 57,05               | 1738,88           | -128,9                 | 0,0                           | 0,4                         | 0,4                             | 0,0                            | 0,0                 | 0,0                           | 1,6                      | 7,4                   | 0,0                           | 0,0                         | 0,4                         | 0,0                                                  |
| FT   | 58.5 - 58.6  | 58,55               | 1784,60           | -174,6                 | 0,0                           | 2,1                         | 1,4                             | 0,0                            | 0,0                 | 0,9                           | 12,6                     | 26,3                  | 0,0                           | 0,0                         | 0,5                         | 0,5                                                  |
| FT   | 59.5 - 59.6  | 59,55               | 1815,08           | -205,1                 | 0,5                           | 1,2                         | 0,0                             | 0,0                            | 0,0                 | 0,0                           | 7,1                      | 22,6                  | 0,0                           | 0,0                         | 0,9                         | 0,0                                                  |
| FT   | 61.0 - 61.1  | 61,05               | 1860,80           | -250,8                 | 0,9                           | 1,8                         | 0,7                             | 0,0                            | 0,0                 | 0,5                           | 3,8                      | 15,4                  | 0,0                           | 0,0                         | 0,5                         | 0,0                                                  |
| FT   | 62.0 - 62.1  | 62,05               | 1891,28           | -281,3                 | 0,4                           | 2,4                         | 0,9                             | 0,0                            | 0,0                 | 0,0                           | 3,5                      | 12,5                  | 0,0                           | 0,0                         | 0,0                         | 0,0                                                  |









| Dinocyst indet | P-cyst indet | G-cyst indet | Skolochorate cyst indet. | Acritarch sp. 0 (smooth) | Acritarch reticulate | Acritarch sp. 1 (spiny) | Acritarch long spines | Fromea fragilis | Veryhachium | Foram linings >3 chambers | Foram linings 3 chambers | Foram linings 2 chambers | Botryococcus |
|----------------|--------------|--------------|--------------------------|--------------------------|----------------------|-------------------------|-----------------------|-----------------|-------------|---------------------------|--------------------------|--------------------------|--------------|
| 24,1           | 0,4          | 5,3          | 2,1                      | 0,0                      | 0,4                  | 0,6                     | 0,8                   | 0,0             | 0,4         | 0,0                       | 0,0                      | 0,0                      | 0,0          |
| 16,5           | 1,3          | 4,5          | 3,9                      | 1,6                      | 0,0                  | 0,8                     | 0,4                   | 0,0             | 0,0         | 0,0                       | 0,0                      | 0,0                      | 0,0          |
| 8,7            | 1,6          | 5,3          | 3,4                      | 0,0                      | 1,1                  | 0,0                     | 0,0                   | 0,4             | 0,8         | 0,0                       | 0,0                      | 0,0                      | 0,0          |
| 1,9            | 0,9          | 3,8          | 0,4                      | 1,2                      | 0,8                  | 0,0                     | 0,4                   | 0,0             | 0,0         | 0,0                       | 0,0                      | 0,0                      | 0,0          |
| 4,7            | 1,6          | 3,7          | 0,0                      | 2,5                      | 0,4                  | 0,0                     | 0,0                   | 0,0             | 0,0         | 0,0                       | 0,0                      | 0,0                      | 0,0          |
| 10,0           | 4,9          | 2,2          | 2,4                      | 4,2                      | 0,3                  | 0,3                     | 0,6                   | 0,0             | 0,0         | 0,0                       | 0,0                      | 0,0                      | 0,0          |
| 4,6            | 2,4          | 1,6          | 0,4                      | 3,2                      | 1,3                  | 0,6                     | 0,0                   | 0,0             | 2,6         | 0,0                       | 0,0                      | 0,0                      | 0,0          |
| 2,6            | 4,6          | 0,9          | 3,1                      | 6,6                      | 1,3                  | 0,3                     | 0,6                   | 0,0             | 0,6         | 0,0                       | 0,0                      | 0,0                      | 0,0          |
| 4,3            | 1,7          | 4,3          | 1,3                      | 2,1                      | 1,0                  | 1,7                     | 0,3                   | 0,0             | 0,3         | 0,0                       | 0,0                      | 0,3                      | 0,0          |
| 7,1            | 7,8          | 2,2          | 3,3                      | 0,7                      | 0,4                  | 0,0                     | 0,4                   | 0,0             | 0,0         | 0,0                       | 0,0                      | 0,0                      | 0,0          |
| 4,3            | 5,2          | 4,3          | 0,0                      | 0,4                      | 0,8                  | 0,0                     | 0,0                   | 0,4             | 0,8         | 0,0                       | 0,0                      | 0,0                      | 0,4          |
| 4,7            | 6,8          | 3,5          | 1,4                      | 0,3                      | 1,0                  | 0,7                     | 0,7                   | 0,3             | 0,0         | 0,0                       | 0,0                      | 0,0                      | 0,0          |
| 2,7            | 5,2          | 7,7          | 1,4                      | 0,0                      | 0,7                  | 0,3                     | 0,0                   | 1,0             | 0,0         | 0,3                       | 0,0                      | 0,3                      | 0,0          |
| 0,9            | 2,6          | 7,4          | 1,5                      | 2,7                      | 0,3                  | 0,3                     | 1,8                   | 0,9             | 1,8         | 0,0                       | 0,0                      | 0,0                      | 0,0          |

| Cyclopsiella sp. | freshwater algae indet. | Palambages | Paralecaniella indentata | Pterospermella |     | Bisaccate pollen | other pollen | Trilete spores | Monolete spores |       |      | MORPHOGROUP Palynodinium spp. | MORPHOGROUP Hystrichosphaeridium tubiferum group | MORPHOGROUP Spiniferites-achomospaera | MORPHOGROUP Areoligera group |
|------------------|-------------------------|------------|--------------------------|----------------|-----|------------------|--------------|----------------|-----------------|-------|------|-------------------------------|--------------------------------------------------|---------------------------------------|------------------------------|
| 0,0              | 0,0                     | 0,0        | 0,0                      | 0,0            | 0,0 | 0,0              | 1,6          | 0,4            | 0,4             | 234   | 4,5  | 20,5                          | 2,8                                              | 12,0                                  | 14,1                         |
| 0,0              | 0,0                     | 0,0        | 1,6                      | 0,0            | 0,0 | 0,6              | 1,6          | 1,2            | 0,0             | 231   | 6    | 23,2                          | 6,7                                              | 15,8                                  | 13,9                         |
| 0,0              | 0,0                     | 0,0        | 0,0                      | 0,0            | 0,0 | 0,4              | 2,7          | 0,4            | 0,0             | 247   | 11   | 25,7                          | 8,5                                              | 20,0                                  | 6,3                          |
| 0,0              | 0,0                     | 0,0        | 0,0                      | 0,0            | 0,0 | 2,7              | 2,3          | 1,9            | 0,0             | 235   | 15,5 | 63,8                          | 1,3                                              | 6,4                                   | 0,9                          |
| 0,0              | 0,0                     | 0,4        | 0,0                      | 0,0            | 0,0 | 4,6              | 1,4          | 3,9            | 0,0             | 245,5 | 12   | 60,9                          | 0,2                                              | 7,3                                   | 1,8                          |
| 0,0              | 0,0                     | 0,3        | 0,0                      | 0,0            | 0,0 | 6,8              | 3,9          | 3,6            | 0,0             | 246   | 30   | 27,0                          | 1,4                                              | 16,5                                  | 1,6                          |
| 0,0              | 0,0                     | 0,0        | 0,0                      | 0,0            | 0,0 | 4,1              | 4,5          | 2,9            | 0,0             | 248,5 | 47   | 11,7                          | 4,6                                              | 32,0                                  | 8,5                          |
| 0,0              | 0,0                     | 0,3        | 0,9                      | 0,0            | 0,0 | 7,8              | 5,3          | 4,1            | 0,0             | 229,5 | 43   | 3,9                           | 3,1                                              | 34,6                                  | 9,4                          |
| 0,0              | 0,0                     | 0,0        | 0,7                      | 0,0            | 0,0 | 6,8              | 1,7          | 3,5            | 0,0             | 234,5 | 30,5 | 1,7                           | 2,1                                              | 19,0                                  | 7,7                          |
| 0,0              | 0,0                     | 0,0        | 0,4                      | 0,0            | 0,0 | 9,8              | 2,5          | 4,7            | 0,0             | 224   | 57,5 | 3,3                           | 3,1                                              | 19,4                                  | 10,3                         |
| 0,0              | 0,0                     | 0,4        | 0,4                      | 0,0            | 0,0 | 10,7             | 2,3          | 3,8            | 0,4             | 211   | 32   | 0,9                           | 1,9                                              | 15,6                                  | 52,4                         |
| 0,0              | 0,0                     | 0,3        | 1,0                      | 0,0            | 0,0 | 16,3             | 3,4          | 3,4            | 0,3             | 212   | 71   | 0,0                           | 2,4                                              | 16,0                                  | 32,5                         |
| 0,0              | 0,0                     | 0,3        | 1,0                      | 0,0            | 0,0 | 12,0             | 2,4          | 3,8            | 0,3             | 221   | 45,5 | 0,0                           | 2,0                                              | 14,9                                  | 27,1                         |
| 0,0              | 0,0                     | 0,3        | 1,2                      | 0,0            | 0,0 | 13,6             | 4,2          | 4,5            | 0,0             | 228,5 | 36,5 | 0,4                           | 3,5                                              | 17,3                                  | 38,1                         |

| MORPHOGROUP Fibrous cribreridinoids | MORPHOGROUP Peridinoids | MORPHOGROUP Manumiella | MORPHOGROUP Other dinocysts |
|-------------------------------------|-------------------------|------------------------|-----------------------------|
| 15,0                                | 1,9                     | 0,0                    | 33,8                        |
| 8,4                                 | 2,6                     | 0,0                    | 29,4                        |
| 11,5                                | 4,5                     | 0,0                    | 23,5                        |
| 12,8                                | 6,6                     | 0,0                    | 8,3                         |
| 15,3                                | 4,9                     | 0,0                    | 9,6                         |
| 23,2                                | 12,2                    | 0,0                    | 18,1                        |
| 9,3                                 | 18,9                    | 0,0                    | 15,1                        |
| 13,5                                | 18,7                    | 0,0                    | 16,8                        |
| 42,0                                | 12,8                    | 0,0                    | 14,7                        |
| 18,3                                | 25,7                    | 0,0                    | 19,9                        |
| 0,7                                 | 15,2                    | 0,0                    | 13,3                        |
| 1,9                                 | 33,5                    | 0,0                    | 13,7                        |
| 6,8                                 | 20,6                    | 0,0                    | 28,5                        |
| 1,1                                 | 16,0                    | 0,0                    | 23,6                        |

**SI Table S4 – Bass River dinoflagellate record (concentrations)**

| Leg   | Site       | Core    | Interval (ft.)    | Depth average (ft.) | Depth (m) | Distance from KTB (m) | Weight (g) | Lycobatch no | Lycopodium # /batch | lycop. Counted (#) | Dinocysts per gram |
|-------|------------|---------|-------------------|---------------------|-----------|-----------------------|------------|--------------|---------------------|--------------------|--------------------|
| 174AX | Bass River | 272 P1c | 1256.75 - 1256.8  | 1256,775            | 383,06502 | 1,05498               | 9,5232     | 483216       | 5358                | 61                 | 2324               |
| 174AX | Bass River | 273 P1c | 1257.5 - 1257.6   | 1257,55             | 383,30124 | 0,81876               | 9,8043     | 483216       | 5358                | 32                 | 3817               |
| 174AX | Bass River | 273 P1c | 1258.05 - 1258.15 | 1258,1              | 383,46888 | 0,65112               | 9,7849     | 483216       | 5358                | 48                 | 2835               |
| 174AX | Bass River | 273 P1c | 1258.2 - 1258.25  | 1258,225            | 383,50698 | 0,61302               | 8,1751     | 483216       | 5358                | 52                 | 3031               |
| 174AX | Bass River | 273 P1c | 1258.5 - 1258.6   | 1258,55             | 383,60604 | 0,51396               | 10,0052    | 483216       | 5358                | 29                 | 4469               |
| 174AX | Bass River | 273 P1a | 1258.75 - 1258.8  | 1258,775            | 383,67462 | 0,44538               | 6,4283     | 483216       | 5358                | 29                 | 6754               |
| 174AX | Bass River | 273 P1a | 1259.05 - 1259.15 | 1259,1              | 383,77368 | 0,34632               | 9,7235     | 483216       | 5358                | 40                 | 3382               |
| 174AX | Bass River | 273 P1a | 1259.35 - 1259.4  | 1259,375            | 383,8575  | 0,2625                | 5,5138     | 483216       | 5358                | 31                 | 7539               |
| 174AX | Bass River | 274     | 1260.8 - 1260.85  | 1260,825            | 384,29946 | -0,17946              | 4,1164     | 483216       | 5358                | 32                 | 9132               |
| 174AX | Bass River | 274     | 1261.0 - 1261.1   | 1261,05             | 384,36804 | -0,24804              | 9,5876     | 483216       | 5358                | 21                 | 7837               |
| 174AX | Bass River | 274     | 1261.25 - 1261.3  | 1261,275            | 384,43662 | -0,31662              | 5,6967     | 483216       | 5358                | 23                 | 9630               |
| 174AX | Bass River | 274     | 1261.4 - 1261.45  | 1261,425            | 384,48234 | -0,36234              | 4,0063     | 483216       | 5358                | 46                 | 7225               |
| 174AX | Bass River | 274     | 1261.6 - 1261.65  | 1261,625            | 384,5433  | -0,4233               | 4,8018     | 483216       | 5358                | 47                 | 6861               |
| 174AX | Bass River | 274     | 1261.8 - 1261.9   | 1261,85             | 384,61188 | -0,49188              | 9,5338     | 483216       | 5358                | 13                 | 13899              |
| 174AX | Bass River | 274     | 1262.05 - 1262.1  | 1262,075            | 384,68046 | -0,56046              | 6,6641     | 483216       | 5358                | 13                 | 26563              |
| 174AX | Bass River | 274     | 1262.25 - 1262.3  | 1262,275            | 384,74142 | -0,62142              | 4,7633     | 483216       | 5358                | 9                  | 45744              |
| 174AX | Bass River | 274     | 1262.5 - 1262.55  | 1262,525            | 384,81762 | -0,69762              | 9,1742     | 483216       | 5358                | 4                  | 65484              |
| 174AX | Bass River | 274     | 1262.65 - 1262.75 | 1262,7              | 384,87096 | -0,75096              | 9,6295     | 483216       | 5358                | 7                  | 25357              |
| 174AX | Bass River | 274     | 1262.9 - 1262.95  | 1262,925            | 384,93954 | -0,81954              | 7,5008     | 483216       | 5358                | 11                 | 24936              |
| 174AX | Bass River | 274     | 1263.1 - 1263.2   | 1263,15             | 385,00812 | -0,88812              | 9,5598     | 483216       | 5358                | 11                 | 16050              |
| 174AX | Bass River | 274     | 1263.4 - 1263.45  | 1263,425            | 385,09194 | -0,97194              | 4,6097     | 483216       | 5358                | 16                 | 27751              |
| 174AX | Bass River | 274     | 1263.9 - 1264.0   | 1263,95             | 385,25196 | -1,13196              | 9,6326     | 483216       | 5358                | 9                  | 22435              |
| 174AX | Bass River | 274     | 1264.35 - 1264.4  | 1264,375            | 385,3815  | -1,2615               | 9,5783     | 483216       | 5358                | 10                 | 21425              |
| 174AX | Bass River | 274     | 1264.85 - 1264.95 | 1264,9              | 385,54152 | -1,42152              | 9,5232     | 483216       | 5358                | 3                  | 77080              |
| 174AX | Bass River | 275     | 1266.4 - 1266.45  | 1266,425            | 386,00634 | -1,88634              | 4,9258     | 483216       | 5358                | 49                 | 5461               |
| 174AX | Bass River | 275     | 1266.9 - 1266.95  | 1266,925            | 386,15874 | -2,03874              | 4,9019     | 483216       | 5358                | 39                 | 6446               |
| 174AX | Bass River | 275     | 1267.4 - 1267.45  | 1267,425            | 386,31114 | -2,19114              | 5,1683     | 483216       | 5358                | 46                 | 5184               |
| 174AX | Bass River | 275     | 1267.9 - 1267.95  | 1267,925            | 386,46354 | -2,34354              | 5,6158     | 483216       | 5358                | 37                 | 6047               |
| 174AX | Bass River | 275     | 1268.4 - 1268.45  | 1268,425            | 386,61594 | -2,49594              | 4,8412     | 483216       | 5358                | 64                 | 3692               |
| 174AX | Bass River | 275     | 1268.9 - 1268.95  | 1268,925            | 386,76834 | -2,64834              | 5,2615     | 483216       | 5358                | 40                 | 5779               |
| 174AX | Bass River | 275     | 1269.4 - 1269.45  | 1269,425            | 386,92074 | -2,80074              | 9,1674     | 483216       | 5358                | 24                 | 5565               |
| 174AX | Bass River | 275     | 1269.9 - 1269.95  | 1269,925            | 387,07314 | -2,95314              | 4,8022     | 483216       | 5358                | 52                 | 4774               |
| 174AX | Bass River | 275     | 1270.4 - 1270.45  | 1270,425            | 387,22554 | -3,10554              | 4,1378     | 483216       | 5358                | 55                 | 5132               |
| 174AX | Bass River | 275     | 1270.9 - 1270.95  | 1270,925            | 387,37794 | -3,25794              | 6,2629     | 483216       | 5358                | 44                 | 4365               |
| 174AX | Bass River | 276     | 1271.4 - 1271.45  | 1271,425            | 387,53034 | -3,41034              | 5,9088     | 483216       | 5358                | 55                 | 3924               |
| 174AX | Bass River | 276     | 1271.85 - 1271.9  | 1271,875            | 387,6675  | -3,5475               | 7,0947     | 483216       | 5358                | 32                 | 5806               |
| 174AX | Bass River | 276     | 1272.25 - 1272.3  | 1272,275            | 387,78942 | -3,66942              | 4,1112     | 483216       | 5358                | 84                 | 3615               |
| 174AX | Bass River | 276     | 1272.4 - 1272.45  | 1272,425            | 387,83514 | -3,71514              | 5,9453     | 483216       | 5358                | 64                 | 3211               |
| 174AX | Bass River | 276     | 1272.9 - 1272.95  | 1272,925            | 387,98754 | -3,86754              | 3,4457     | 483216       | 5358                | 126                | 2752               |
| 174AX | Bass River | 276     | 1272.9 - 1273.0   | 1272,95             | 387,99516 | -3,87516              | 9,6686     | 483216       | 5358                | 35                 | 4030               |











|                                        |    |    |      |     |     |     |      |    |   |   |    |    |    |      |     |   |     |    |    |    |    |   |     |      |
|----------------------------------------|----|----|------|-----|-----|-----|------|----|---|---|----|----|----|------|-----|---|-----|----|----|----|----|---|-----|------|
| <i>Pyxidiniopsis</i> sp.               | 0  | 0  | 74   | 65  | 9   | 9   | 65   | 0  | 0 | 0 | 0  | 18 | 0  | 161  | 18  | 0 | 14  | 0  | 0  | 0  | 0  | 0 | 0   | 0    |
| <i>Renidinium gracile</i>              | 0  | 0  | 34   | 154 | 17  | 0   | 205  | 0  | 0 | 0 | 0  | 0  | 0  | 1315 | 51  | 0 | 0   | 0  | 0  | 34 | 0  | 0 | 0   | 0    |
| <i>Senegalinium bicaevatum</i>         | 0  | 0  | 11   | 11  | 23  | 0   | 23   | 0  | 0 | 0 | 0  | 0  | 0  | 411  | 11  | 0 | 11  | 0  | 0  | 0  | 0  | 0 | 0   | 0    |
| <i>Senegalinium? dilwynense</i>        | 0  | 0  | 0    | 13  | 13  | 13  | 82   | 0  | 0 | 0 | 13 | 0  | 0  | 542  | 13  | 0 | 38  | 0  | 13 | 13 | 0  | 0 | 0   | 25   |
| <i>Senegalinium microgranulatum</i>    | 18 | 0  | 0    | 0   | 0   | 18  | 0    | 0  | 0 | 0 | 0  | 0  | 18 | 443  | 0   | 0 | 55  | 18 | 0  | 0  | 0  | 0 | 0   | 0    |
| <i>Senegalinium obscurum</i>           | 0  | 0  | 158  | 57  | 29  | 0   | 187  | 29 | 0 | 0 | 0  | 0  | 0  | 503  | 115 | 0 | 0   | 29 | 43 | 0  | 0  | 0 | 29  | 0    |
| <i>Senegalinium spp. Undiff.</i>       | 0  | 0  | 0    | 0   | 0   | 41  | 28   | 0  | 0 | 0 | 0  | 0  | 14 | 833  | 0   | 0 | 41  | 0  | 21 | 0  | 0  | 0 | 41  | 0    |
| <i>Senoniasphaera inornata</i>         | 0  | 0  | 63   | 31  | 0   | 125 | 282  | 0  | 0 | 0 | 0  | 0  | 0  | 549  | 0   | 0 | 63  | 0  | 31 | 0  | 0  | 0 | 157 | 0    |
| <i>Senoniasphaera protrusa</i>         | 0  | 0  | 0    | 0   | 0   | 0   | 0    | 0  | 0 | 0 | 0  | 0  | 0  | 0    | 0   | 0 | 0   | 0  | 0  | 0  | 0  | 0 | 0   | 0    |
| <i>Senoniasphaera rotundata</i>        | 0  | 0  | 81   | 0   | 407 | 407 | 244  | 0  | 0 | 0 | 0  | 0  | 0  | 1078 | 122 | 0 | 81  | 0  | 0  | 0  | 0  | 0 | 0   | 549  |
| <i>small peridinioid sp. 1</i>         | 0  | 0  | 53   | 0   | 53  | 186 | 293  | 0  | 0 | 0 | 27 | 0  | 0  | 2049 | 0   | 0 | 293 | 0  | 0  | 0  | 0  | 0 | 0   | 599  |
| <i>Spinidinium</i> sp.                 | 0  | 0  | 204  | 41  | 0   | 613 | 573  | 0  | 0 | 0 | 41 | 0  | 0  | 1861 | 0   | 0 | 368 | 0  | 0  | 0  | 0  | 0 | 0   | 123  |
| <i>Spinidinium densispinatum</i>       | 29 | 0  | 145  | 29  | 29  | 174 | 538  | 0  | 0 | 0 | 29 | 0  | 0  | 669  | 0   | 0 | 145 | 0  | 0  | 0  | 0  | 0 | 0   | 116  |
| <i>Spiniferites ramosus</i> cpx.       | 0  | 0  | 285  | 0   | 0   | 237 | 309  | 0  | 0 | 0 | 0  | 0  | 0  | 1068 | 24  | 0 | 119 | 0  | 24 | 0  | 0  | 0 | 0   | 380  |
| <i>Spiniferites</i> sp.                | 0  | 0  | 346  | 0   | 0   | 173 | 562  | 0  | 0 | 0 | 0  | 0  | 0  | 1340 | 0   | 0 | 43  | 0  | 0  | 0  | 0  | 0 | 0   | 216  |
| <i>Spongodinium delitiense</i>         | 0  | 0  | 1113 | 0   | 124 | 371 | 990  | 0  | 0 | 0 | 62 | 0  | 0  | 1763 | 0   | 0 | 247 | 0  | 0  | 0  | 0  | 0 | 0   | 742  |
| <i>Tanyosphaeridium xanthiopyxides</i> | 0  | 0  | 1437 | 0   | 375 | 250 | 1937 | 0  | 0 | 0 | 0  | 0  | 0  | 1125 | 0   | 0 | 0   | 0  | 0  | 0  | 0  | 0 | 0   | 250  |
| <i>Thalassiphora ?bononiensis</i>      | 0  | 0  | 730  | 0   | 0   | 0   | 292  | 0  | 0 | 0 | 0  | 0  | 0  | 438  | 0   | 0 | 0   | 0  | 0  | 0  | 0  | 0 | 0   | 292  |
| <i>Thalassiphora patula</i>            | 0  | 0  | 477  | 0   | 0   | 0   | 795  | 0  | 0 | 0 | 0  | 0  | 0  | 1073 | 0   | 0 | 79  | 0  | 0  | 0  | 0  | 0 | 0   | 1033 |
| <i>Thalassiphora pelagica</i>          | 0  | 0  | 974  | 0   | 0   | 325 | 1299 | 0  | 0 | 0 | 0  | 0  | 0  | 1039 | 0   | 0 | 65  | 0  | 0  | 65 | 0  | 0 | 0   | 1948 |
| <i>Trigonyxidium</i> sp.               | 0  | 0  | 662  | 0   | 0   | 204 | 560  | 0  | 0 | 0 | 51 | 0  | 0  | 1274 | 51  | 0 | 102 | 0  | 0  | 0  | 0  | 0 | 0   | 1223 |
| <i>Trithyrodinium evittii</i>          | 0  | 0  | 1852 | 0   | 218 | 291 | 2034 | 0  | 0 | 0 | 0  | 0  | 0  | 981  | 0   | 0 | 0   | 0  | 0  | 0  | 0  | 0 | 0   | 2906 |
|                                        | 0  | 0  | 803  | 0   | 247 | 0   | 618  | 0  | 0 | 0 | 0  | 0  | 0  | 1545 | 0   | 0 | 124 | 0  | 0  | 0  | 0  | 0 | 0   | 1483 |
|                                        | 0  | 0  | 0    | 0   | 0   | 56  | 56   | 0  | 0 | 0 | 0  | 0  | 0  | 1650 | 112 | 0 | 0   | 0  | 0  | 0  | 0  | 0 | 0   | 0    |
|                                        | 0  | 0  | 0    | 0   | 0   | 0   | 188  | 0  | 0 | 0 | 0  | 0  | 0  | 563  | 0   | 0 | 0   | 0  | 0  | 0  | 0  | 0 | 0   | 750  |
|                                        | 0  | 0  | 0    | 0   | 0   | 0   | 0    | 0  | 0 | 0 | 0  | 0  | 0  | 0    | 0   | 0 | 0   | 0  | 0  | 0  | 0  | 0 | 0   | 0    |
|                                        | 0  | 0  | 222  | 0   | 44  | 333 | 533  | 0  | 0 | 0 | 22 | 22 | 0  | 1732 | 44  | 0 | 155 | 0  | 0  | 0  | 0  | 0 | 0   | 67   |
|                                        | 0  | 0  | 266  | 0   | 28  | 476 | 729  | 0  | 0 | 0 | 28 | 28 | 0  | 1612 | 70  | 0 | 56  | 0  | 0  | 0  | 28 | 0 | 0   | 0    |
|                                        | 0  | 0  | 248  | 0   | 23  | 135 | 473  | 0  | 0 | 0 | 23 | 0  | 0  | 1251 | 23  | 0 | 79  | 0  | 0  | 23 | 0  | 0 | 0   | 34   |
|                                        | 0  | 0  | 103  | 0   | 26  | 155 | 387  | 0  | 0 | 0 | 26 | 0  | 0  | 1986 | 52  | 0 | 103 | 0  | 0  | 0  | 0  | 0 | 0   | 155  |
|                                        | 0  | 0  | 95   | 0   | 35  | 86  | 294  | 0  | 0 | 0 | 86 | 0  | 0  | 1167 | 43  | 0 | 104 | 0  | 17 | 0  | 0  | 0 | 0   | 35   |
|                                        | 0  | 0  | 0    | 0   | 25  | 204 | 382  | 0  | 0 | 0 | 51 | 0  | 0  | 1324 | 25  | 0 | 153 | 0  | 0  | 0  | 0  | 0 | 0   | 0    |
|                                        | 0  | 0  | 97   | 0   | 0   | 219 | 317  | 0  | 0 | 0 | 24 | 0  | 0  | 1352 | 24  | 0 | 122 | 24 | 0  | 0  | 0  | 0 | 0   | 97   |
|                                        | 0  | 0  | 257  | 0   | 0   | 64  | 343  | 0  | 0 | 0 | 21 | 0  | 0  | 880  | 21  | 0 | 107 | 0  | 0  | 21 | 0  | 0 | 0   | 86   |
|                                        | 0  | 0  | 259  | 0   | 0   | 24  | 330  | 0  | 0 | 0 | 47 | 0  | 0  | 742  | 47  | 0 | 71  | 0  | 0  | 0  | 0  | 0 | 0   | 306  |
|                                        | 0  | 0  | 253  | 0   | 58  | 19  | 126  | 0  | 0 | 0 | 0  | 0  | 0  | 671  | 49  | 0 | 117 | 0  | 0  | 0  | 0  | 0 | 0   | 243  |
|                                        | 0  | 0  | 165  | 0   | 0   | 33  | 115  | 0  | 0 | 0 | 0  | 0  | 0  | 907  | 0   | 0 | 115 | 0  | 0  | 0  | 0  | 0 | 0   | 115  |
|                                        | 0  | 0  | 236  | 0   | 47  | 94  | 295  | 0  | 0 | 0 | 0  | 0  | 0  | 861  | 24  | 0 | 165 | 0  | 24 | 0  | 0  | 0 | 0   | 165  |
|                                        | 0  | 0  | 264  | 0   | 0   | 47  | 240  | 0  | 0 | 0 | 0  | 0  | 0  | 714  | 31  | 0 | 62  | 16 | 16 | 0  | 0  | 0 | 0   | 209  |
|                                        | 0  | 0  | 99   | 0   | 0   | 14  | 127  | 0  | 0 | 0 | 0  | 14 | 0  | 1197 | 14  | 0 | 155 | 0  | 0  | 0  | 14 | 0 | 0   | 113  |
|                                        | 0  | 0  | 25   | 0   | 0   | 37  | 123  | 0  | 0 | 0 | 12 | 0  | 0  | 919  | 0   | 0 | 148 | 0  | 0  | 0  | 12 | 0 | 0   | 74   |
|                                        | 0  | 16 | 63   | 0   | 95  | 79  | 111  | 0  | 0 | 0 | 32 | 0  | 0  | 855  | 135 | 0 | 71  | 0  | 0  | 0  | 0  | 0 | 0   | 214  |

|  | Dinocyst indet | P-cyst indet | G-cyst indet | skolochorate indet. | MORPHOGROUP Areoligera group | MORPHOGROUP Spiniferites cpx | MORPHOGROUP Hystrichosphaeridium spp. | MORPHOGROUP Fibrous cribroperidinioids | MORPHOGROUP Palynodinium |
|--|----------------|--------------|--------------|---------------------|------------------------------|------------------------------|---------------------------------------|----------------------------------------|--------------------------|
|  | 46             | 32           | 0            | 37                  | 1162                         | 401                          | 0                                     | 111                                    | 0                        |
|  | 171            | 34           | 17           | 34                  | 324                          | 1537                         | 154                                   | 282                                    | 17                       |
|  | 103            | 74           | 0            | 51                  | 491                          | 496                          | 131                                   | 770                                    | 34                       |
|  | 126            | 139          | 0            | 13                  | 1122                         | 592                          | 113                                   | 208                                    | 0                        |
|  | 129            | 111          | 0            | 55                  | 942                          | 692                          | 277                                   | 314                                    | 0                        |
|  | 244            | 259          | 0            | 144                 | 1279                         | 1006                         | 201                                   | 1078                                   | 0                        |
|  | 220            | 96           | 0            | 69                  | 544                          | 1081                         | 200                                   | 145                                    | 0                        |
|  | 533            | 110          | 63           | 157                 | 2915                         | 1379                         | 392                                   | 94                                     | 94                       |
|  | 0              | 0            | 0            | 0                   |                              |                              |                                       |                                        |                          |
|  | 427            | 386          | 0            | 81                  | 41                           | 2196                         | 203                                   | 1058                                   | 630                      |
|  | 160            | 80           | 0            | 0                   | 27                           | 2315                         | 120                                   | 1264                                   | 705                      |
|  | 327            | 409          | 0            | 82                  | 123                          | 2842                         | 41                                    | 1268                                   | 941                      |
|  | 611            | 204          | 0            | 15                  | 58                           | 1177                         | 73                                    | 1933                                   | 1366                     |
|  | 178            | 261          | 12           | 0                   | 71                           | 1555                         | 24                                    | 1424                                   | 1472                     |
|  | 195            | 216          | 0            | 43                  | 0                            | 1556                         | 130                                   | 1945                                   | 7954                     |
|  | 247            | 186          | 0            | 62                  | 124                          | 1979                         | 93                                    | 2598                                   | 16637                    |
|  | 0              | 500          | 0            | 0                   | 0                            | 3000                         | 250                                   | 7874                                   | 28621                    |
|  | 146            | 146          | 0            | 0                   | 0                            | 876                          | 0                                     | 9417                                   | 53439                    |
|  | 79             | 79           | 0            | 40                  | 159                          | 1391                         | 0                                     | 5445                                   | 15421                    |
|  | 325            | 325          | 0            | 0                   | 65                           | 1429                         | 0                                     | 7858                                   | 9643                     |
|  | 153            | 331          | 0            | 0                   | 102                          | 1732                         | 127                                   | 6165                                   | 4356                     |
|  | 617            | 872          | 0            | 109                 | 73                           | 1126                         | 73                                    | 8790                                   | 8282                     |
|  | 247            | 0            | 0            | 0                   | 124                          | 1700                         | 155                                   | 9611                                   | 6459                     |
|  | 0              | 112          | 0            | 56                  | 112                          | 2210                         | 168                                   | 14964                                  | 3077                     |
|  | 0              | 0            | 0            | 0                   | 188                          | 1875                         | 375                                   | 9658                                   | 63483                    |
|  | 0              | 0            | 0            | 0                   |                              |                              |                                       |                                        |                          |
|  | 300            | 222          | 0            | 78                  | 166                          | 2275                         | 100                                   | 244                                    | 111                      |
|  | 392            | 364          | 0            | 98                  | 420                          | 2130                         | 266                                   | 238                                    | 0                        |
|  | 383            | 180          | 0            | 56                  | 237                          | 2164                         | 79                                    | 248                                    | 23                       |
|  | 413            | 271          | 0            | 52                  | 181                          | 2785                         | 155                                   | 297                                    | 0                        |
|  | 147            | 173          | 0            | 43                  | 259                          | 1504                         | 78                                    | 242                                    | 35                       |
|  | 458            | 216          | 0            | 51                  | 178                          | 1833                         | 153                                   | 165                                    | 0                        |
|  | 183            | 341          | 0            | 110                 | 292                          | 1729                         | 134                                   | 219                                    | 61                       |
|  | 397            | 333          | 0            | 21                  | 236                          | 1416                         | 21                                    | 193                                    | 43                       |
|  | 471            | 283          | 0            | 24                  | 177                          | 1236                         | 118                                   | 47                                     | 0                        |
|  | 243            | 194          | 19           | 0                   | 156                          | 1244                         | 311                                   | 156                                    | 0                        |
|  | 223            | 165          | 0            | 8                   | 157                          | 1443                         | 239                                   | 82                                     | 16                       |
|  | 413            | 342          | 0            | 47                  | 354                          | 1794                         | 153                                   | 319                                    | 0                        |
|  | 264            | 202          | 0            | 16                  | 124                          | 1071                         | 155                                   | 202                                    | 31                       |
|  | 84             | 49           | 0            | 14                  | 218                          | 1521                         | 120                                   | 106                                    | 0                        |
|  | 37             | 68           | 19           | 37                  | 204                          | 1382                         | 37                                    | 93                                     | 0                        |
|  | 87             | 79           | 32           | 16                  | 792                          | 1377                         | 214                                   | 245                                    | 0                        |

**SI Table S5 – Meirs Farm dinoflagellate record (concentrations)**

| Code | Interval      | Average depth (ft.) | Depth (m) | Distance from KTB (cm) | lycop. Counted (#) | Weight  | Lycopodium # /batch | Achilleodinium biannii | Achomospaera sagena | Achomospaera ramulifera | Adnatospaeridium buccinum | Alisocysta circumtabulata |   |
|------|---------------|---------------------|-----------|------------------------|--------------------|---------|---------------------|------------------------|---------------------|-------------------------|---------------------------|---------------------------|---|
| MF1  | 24.0 - 24.1   | 24,05               | 7,33044   | 558,956 x              |                    | 11,7252 | 10679               | Barren                 |                     |                         |                           |                           |   |
| MF1  | 27.3 - 27.4   | 27,35               | 8,33628   | 458,372 x              |                    | 11,8338 | 10679               | Barren                 |                     |                         |                           |                           |   |
| MF1  | 29.4 - 29.5   | 29,45               | 8,97636   | 394,364 x              |                    | 11,4681 | 10679               | Barren                 |                     |                         |                           |                           |   |
| MF1  | 32.4 - 32.5   | 32,45               | 9,89076   | 302,924 x              |                    | 11,7121 | 10679               | Barren                 |                     |                         |                           |                           |   |
| MF1  | 34.9 - 35.0   | 34,95               | 10,65276  | 226,724 x              |                    | 11,4576 | 10679               | Barren                 |                     |                         |                           |                           |   |
| MF1  | 37.4 - 37.5   | 37,45               | 11,41476  | 150,524 x              |                    | 11,2857 | 10679               | Barren                 |                     |                         |                           |                           |   |
| MF1  | 39.9 - 40.0   | 39,95               | 12,17676  | 74,324                 | 341                | 11,4131 | 10679               |                        | 3                   | 0                       | 27                        | 0                         | 0 |
| MF1  | 40.5 - 40.6   | 40,55               | 12,35964  | 56,036                 | 172                | 5,8225  | 10679               | 11                     | 5                   | 11                      | 0                         | 0                         |   |
| MF1  | 40.9 - 41.0   | 40,95               | 12,48156  | 43,844                 | 64                 | 11,7657 | 10679               | 14                     | 0                   | 64                      | 0                         | 0                         |   |
| MF1  | 41.1 - 41.2   | 41,15               | 12,54252  | 37,748                 | 126                | 10,6799 | 10679               | 16                     | 0                   | 44                      | 0                         | 0                         |   |
| MF1  | 41.45 - 41.5  | 41,475              | 12,64158  | 27,842                 | 117                | 9,5636  | 10679               | 19                     | 0                   | 38                      | 0                         | 10                        |   |
| MF1  | 41.7 - 41.8   | 41,75               | 12,7254   | 19,46                  | 112                | 11,4142 | 10679               | 17                     | 0                   | 50                      | 0                         | 0                         |   |
| MF1  | 42.0 - 42.05  | 42,025              | 12,80922  | 11,078                 | 162                | 10,7253 | 10679               | 37                     | 0                   | 43                      | 0                         | 0                         |   |
| MF1  | 42.05 - 42.10 | 42,075              | 12,82446  | 9,554                  | 378                | 3,9173  | 10679               | 43                     | 0                   | 40                      | 0                         | 7                         |   |
| MF1  | 42.12 - 42.18 | 42,15               | 12,84732  | 7,268                  | 193                | 5,9129  | 10679               | 19                     | 0                   | 56                      | 0                         | 0                         |   |
| MF1  | 42.2 - 42.25  | 42,225              | 12,87018  | 4,982                  | 733                | 6,394   | 10679               | 2                      | 0                   | 23                      | 0                         | 0                         |   |
| MF1  | 42.3 - 42.35  | 42,325              | 12,90066  | 1,934                  | 435                | 6,4861  | 10679               | 13                     | 0                   | 23                      | 0                         | 0                         |   |
| MF1  | 42.4 - 42.5   | 42,45               | 12,93876  | -1,876                 | 269                | 10,6436 | 10679               | 21                     | 0                   | 24                      | 0                         | 0                         |   |
| MF1  | 42.5 - 42.6   | 42,55               | 12,96924  | -4,924                 | 97                 | 11,3158 | 10679               | 34                     | 0                   | 88                      | 0                         | 0                         |   |
| MF1  | 42.95 - 43.0  | 42,975              | 13,09878  | -17,878                | 81                 | 8,2274  | 10679               | 64                     | 0                   | 32                      | 0                         | 0                         |   |
| MF1  | 43.3 - 43.4   | 43,35               | 13,21308  | -29,308                | 30                 | 11,6841 | 10679               | 76                     | 0                   | 30                      | 0                         | 0                         |   |
| MF1  | 44.1 - 44.2   | 44,15               | 13,45692  | -53,692                | 35                 | 11,4078 | 10679               | 0                      | 0                   | 67                      | 0                         | 0                         |   |
| MF1  | 44.9 - 45.0   | 44,95               | 13,70076  | -78,076                | 32                 | 11,3779 | 10679               | 44                     | 0                   | 103                     | 0                         | 0                         |   |
| MF1  | 46.18 - 46.22 | 46,2                | 14,08176  | -116,176               | 53                 | 8,848   | 10679               | 57                     | 46                  | 342                     | 0                         | 0                         |   |
| MF1  | 47.4 - 47.5   | 47,45               | 14,46276  | -154,276               | 20                 | 11,1949 | 10679               | 95                     | 0                   | 0                       | 0                         | 0                         |   |
| MF1  | 49.9 - 49.95  | 49,975              | 15,23238  | -231,238               | 32                 | 9,45    | 10679               | 35                     | 0                   | 194                     | 0                         | 35                        |   |
| MF1  | 52.4 - 52.5   | 52,45               | 15,98676  | -306,676               | 32                 | 11,2426 | 10679               | 148                    | 0                   | 59                      | 0                         | 0                         |   |
| MF1  | 55.05 - 55.1  | 55,075              | 16,78686  | -386,686               | 39                 | 9,4149  | 10679               | 29                     | 0                   | 218                     | 0                         | 0                         |   |
| MF1  | 57.4 - 57.5   | 57,45               | 17,51076  | -459,076               | 31                 | 11,3525 | 10679               | 152                    | 0                   | 258                     | 0                         | 0                         |   |
| MF1  | 59.9 - 59.95  | 59,925              | 18,26514  | -534,514               | 39                 | 9,7089  | 10679               | 28                     | 0                   | 197                     | 0                         | 0                         |   |
| MF1  | 62.5 - 62.6   | 62,4                | 19,01952  | -609,952               | 46                 | 11,4185 | 10679               | 41                     | 0                   | 122                     | 0                         | 0                         |   |
| MF1  | 64.95 - 65.0  | 64,875              | 19,7739   | -685,39                | 33                 | 9,9009  | 10679               | 33                     | 33                  | 163                     | 0                         | 0                         |   |
| MF1  | 67.4 - 67.5   | 67,45               | 20,55876  | -763,876               | 42                 | 11,4432 | 10679               | 44                     | 0                   | 89                      | 0                         | 0                         |   |
| MF1  | 69.55 - 69.6  | 69,575              | 21,20646  | -828,646               | 57                 | 9,3741  | 10679               | 40                     | 20                  | 150                     | 0                         | 0                         |   |
| MF1  | 71.7 - 71.8   | 71,75               | 21,8694   | -894,94                | 34                 | 11,286  | 10679               | 28                     | 28                  | 0                       | 28                        | 0                         |   |



|                                                        |     |     |    |    |     |     |     |   |     |    |     |     |   |    |     |    |    |     |     |    |     |    |    |    |    |    |   |
|--------------------------------------------------------|-----|-----|----|----|-----|-----|-----|---|-----|----|-----|-----|---|----|-----|----|----|-----|-----|----|-----|----|----|----|----|----|---|
| Cordosphaeridium fibrospinosum var cornuta             | 0   | 0   | 0  | 0  | 3   | 0   | 0   | 3 | 3   | 0  | 3   | 0   | 0 | 7  | 0   | 0  | 3  | 0   | 0   | 0  | 0   | 3  | 5  | 0  | 1  | 0  | 0 |
| Cordosphaeridium/Dammasadinium complex                 | 0   | 0   | 0  | 0  | 32  | 0   | 0   | 0 | 0   | 0  | 21  | 0   | 0 | 0  | 0   | 11 | 0  | 0   | 0   | 0  | 11  | 0  | 11 | 0  | 0  | 0  |   |
| Coronifera ?oceanica                                   | 0   | 0   | 0  | 28 | 78  | 14  | 0   | 0 | 14  | 0  | 14  | 0   | 0 | 28 | 0   | 0  | 14 | 0   | 0   | 0  | 0   | 64 | 0  | 28 | 0  | 0  |   |
| Coronifera striolata                                   | 0   | 0   | 0  | 0  | 16  | 0   | 0   | 0 | 0   | 0  | 12  | 0   | 0 | 0  | 0   | 8  | 0  | 0   | 0   | 0  | 32  | 40 | 0  | 0  | 8  | 8  |   |
| Cribroperidinium sp. A of Brinkhuis and Schioler, 1996 | 0   | 10  | 0  | 0  | 0   | 10  | 0   | 0 | 0   | 0  | 14  | 0   | 0 | 0  | 0   | 19 | 0  | 0   | 0   | 0  | 10  | 10 | 10 | 0  | 0  | 38 |   |
| Cribroperidinium sp.                                   | 0   | 0   | 0  | 0  | 13  | 4   | 0   | 0 | 0   | 0  | 4   | 0   | 0 | 17 | 0   | 0  | 17 | 0   | 0   | 0  | 8   | 13 | 0  | 8  | 4  | 0  |   |
| Cyclonephelium distinctum                              | 0   | 0   | 0  | 0  | 22  | 6   | 0   | 0 | 0   | 0  | 12  | 6   | 0 | 12 | 0   | 6  | 0  | 6   | 0   | 6  | 6   | 12 | 0  | 6  | 6  | 0  |   |
| Dammasadinium cf. californicum                         | 0   | 0   | 0  | 7  | 7   | 7   | 0   | 0 | 0   | 0  | 0   | 0   | 0 | 7  | 0   | 0  | 0  | 0   | 7   | 0  | 0   | 7  | 0  | 0  | 0  | 0  |   |
| Deflandrea galeata                                     | 0   | 0   | 0  | 0  | 0   | 0   | 0   | 0 | 0   | 0  | 9   | 0   | 9 | 9  | 0   | 0  | 9  | 0   | 19  | 19 | 5   | 0  | 9  | 0  | 0  | 5  |   |
| Deflandrea cf. galeata                                 | 0   | 0   | 0  | 0  | 2   | 0   | 0   | 0 | 0   | 0  | 0   | 0   | 2 | 5  | 0   | 0  | 0  | 1   | 0   | 2  | 3   | 0  | 0  | 0  | 0  | 0  |   |
| Deflandrea ?tuberculata                                | 4   | 0   | 0  | 0  | 4   | 0   | 0   | 0 | 0   | 0  | 0   | 0   | 0 | 0  | 0   | 0  | 0  | 0   | 0   | 0  | 9   | 8  | 8  | 0  | 0  | 4  |   |
| Diconodinium wilsonii                                  | 0   | 0   | 0  | 0  | 0   | 7   | 0   | 0 | 0   | 0  | 7   | 0   | 0 | 0  | 0   | 0  | 0  | 0   | 4   | 0  | 35  | 13 | 0  | 0  | 0  | 0  |   |
| Dinocyst sp. 1                                         | 10  | 0   | 0  | 0  | 29  | 0   | 10  | 0 | 0   | 10 | 10  | 29  | 0 | 10 | 0   | 0  | 0  | 10  | 39  | 0  | 5   | 10 | 0  | 0  | 0  | 10 |   |
| Dinocyst sp. 2                                         | 0   | 0   | 0  | 0  | 16  | 0   | 0   | 0 | 0   | 0  | 0   | 0   | 0 | 0  | 0   | 0  | 0  | 0   | 24  | 0  | 16  | 0  | 0  | 0  | 0  | 16 |   |
| Dinocyst sp. 3                                         | 0   | 30  | 0  | 0  | 30  | 0   | 0   | 0 | 0   | 0  | 0   | 0   | 0 | 0  | 0   | 0  | 0  | 61  | 30  | 0  | 0   | 0  | 0  | 30 | 0  | 0  |   |
| Dinogymnium sp.                                        | 495 | 308 | 0  | 0  | 134 | 27  | 0   | 0 | 0   | 13 | 27  | 0   | 0 | 0  | 0   | 0  | 0  | 147 | 80  | 0  | 80  | 27 | 0  | 53 | 27 | 53 |   |
| Diphyes sp.                                            | 161 | 323 | 0  | 0  | 176 | 29  | 0   | 0 | 29  | 29 | 59  | 0   | 0 | 0  | 0   | 0  | 0  | 249 | 0   | 0  | 29  | 29 | 0  | 0  | 29 | 0  |   |
| Disphaerogena carposphaeropsis                         | 11  | 0   | 0  | 0  | 23  | 0   | 0   | 0 | 0   | 0  | 0   | 0   | 0 | 0  | 0   | 0  | 0  | 0   | 137 | 68 | 23  | 0  | 0  | 0  | 23 | 23 |   |
| Disphaerogena carposphaeropsis var. cornuta            | 0   | 0   | 0  | 0  | 143 | 48  | 0   | 0 | 0   | 0  | 95  | 0   | 0 | 0  | 0   | 48 | 0  | 48  | 0   | 0  | 0   | 48 | 0  | 0  | 48 | 0  |   |
| Druggidium meerensis                                   | 35  | 0   | 0  | 35 | 283 | 318 | 0   | 0 | 71  | 0  | 159 | 0   | 0 | 0  | 0   | 35 | 0  | 35  | 0   | 0  | 0   | 0  | 0  | 0  | 0  | 71 |   |
| Exosphaeridium bifidum                                 | 0   | 0   | 0  | 0  | 0   | 208 | 45  | 0 | 0   | 59 | 163 | 30  | 0 | 0  | 0   | 30 | 0  | 0   | 0   | 0  | 178 | 89 | 0  | 0  | 0  | 0  |   |
| Exosphaeridium sp.                                     | 29  | 0   | 0  | 0  | 0   | 160 | 87  | 0 | 0   | 29 | 0   | 44  | 0 | 58 | 0   | 0  | 0  | 0   | 0   | 0  | 29  | 0  | 29 | 0  | 0  | 29 |   |
| Fibradinium annetorpense                               | 0   | 0   | 0  | 0  | 0   | 121 | 76  | 0 | 0   | 61 | 121 | 212 | 0 | 0  | 0   | 0  | 0  | 0   | 0   | 0  | 30  | 91 | 0  | 0  | 0  | 0  |   |
| Fibrocysta axialis                                     | 0   | 0   | 0  | 28 | 28  | 0   | 99  | 0 | 155 | 0  | 0   | 56  | 0 | 0  | 113 | 0  | 28 | 0   | 0   | 0  | 0   | 0  | 0  | 0  | 0  | 42 |   |
| Fibrocysta spp. Undiff.                                | 0   | 0   | 0  | 0  | 0   | 346 | 0   | 0 | 0   | 0  | 51  | 0   | 0 | 0  | 0   | 0  | 0  | 0   | 0   | 0  | 81  | 0  | 0  | 0  | 0  | 0  |   |
| Florentinia mantellii                                  | 0   | 0   | 65 | 33 | 0   | 114 | 33  | 0 | 0   | 33 | 0   | 65  | 0 | 33 | 98  | 0  | 0  | 0   | 0   | 0  | 0   | 0  | 0  | 0  | 0  | 0  |   |
|                                                        | 0   | 0   | 0  | 0  | 0   | 67  | 100 | 0 | 0   | 22 | 111 | 0   | 0 | 0  | 0   | 0  | 0  | 0   | 0   | 0  | 67  | 0  | 0  | 22 | 0  | 0  |   |
|                                                        | 0   | 0   | 0  | 20 | 0   | 0   | 20  | 0 | 180 | 20 | 40  | 20  | 0 | 0  | 0   | 0  | 0  | 0   | 0   | 0  | 0   | 0  | 20 | 0  | 0  | 20 |   |
|                                                        | 0   | 0   | 28 | 0  | 70  | 56  | 56  | 0 | 28  | 0  | 97  | 0   | 0 | 0  | 0   | 0  | 0  | 0   | 0   | 0  | 0   | 28 | 0  | 56 | 0  | 0  |   |





|                                   |    |    |    |     |    |    |     |     |     |     |    |   |    |     |    |      |      |    |     |    |    |     |    |    |    |    |
|-----------------------------------|----|----|----|-----|----|----|-----|-----|-----|-----|----|---|----|-----|----|------|------|----|-----|----|----|-----|----|----|----|----|
| ?Lithosphaeridium sp.             | 3  | 0  | 0  | 29  | 0  | 0  | 0   | 8   | 0   | 5   | 0  | 0 | 0  | 27  | 0  | 43   | 77   | 0  | 0   | 3  | 0  | 3   | 3  | 10 | 0  | 0  |
| Manumiliella seelandica           | 0  | 0  | 0  | 53  | 0  | 0  | 0   | 21  | 0   | 0   | 0  | 0 | 0  | 27  | 0  | 256  | 75   | 11 | 0   | 0  | 0  | 0   | 0  | 0  | 0  | 0  |
| Membranilarnacia tenella          | 14 | 0  | 0  | 135 | 0  | 0  | 21  | 0   | 0   | 14  | 21 | 0 | 0  | 0   | 0  | 142  | 425  | 14 | 0   | 0  | 7  | 0   | 43 | 43 | 0  | 0  |
| Microdinium inornatum             | 0  | 0  | 0  | 63  | 0  | 0  | 8   | 8   | 0   | 36  | 8  | 0 | 0  | 32  | 0  | 171  | 87   | 0  | 0   | 4  | 0  | 0   | 0  | 0  | 0  | 52 |
| Neonorthidium? perforatum         | 0  | 0  | 0  | 19  | 0  | 0  | 10  | 29  | 0   | 0   | 10 | 0 | 0  | 0   | 0  | 81   | 344  | 0  | 0   | 0  | 0  | 0   | 10 | 0  | 19 | 0  |
| Odontochitina spp.                | 0  | 0  | 6  | 92  | 0  | 0  | 6   | 0   | 0   | 18  | 0  | 0 | 0  | 0   | 0  | 108  | 209  | 0  | 0   | 0  | 0  | 0   | 12 | 6  | 0  | 12 |
| Oligosphaeridium complex          | 0  | 0  | 14 | 65  | 0  | 0  | 0   | 14  | 0   | 0   | 0  | 0 | 0  | 0   | 0  | 101  | 184  | 4  | 7   | 0  | 0  | 0   | 0  | 14 | 14 | 7  |
| Operculodinium sp.                | 0  | 0  | 0  | 47  | 0  | 0  | 19  | 47  | 0   | 0   | 0  | 0 | 0  | 0   | 0  | 66   | 533  | 0  | 0   | 0  | 0  | 0   | 0  | 0  | 0  | 0  |
| Palaeocystodinium australinum     | 0  | 0  | 1  | 18  | 2  | 0  | 2   | 15  | 0   | 0   | 0  | 0 | 0  | 7   | 0  | 2    | 14   | 0  | 0   | 0  | 0  | 0   | 2  | 0  | 5  | 2  |
| Palaeocystodinium golzowense      | 0  | 0  | 0  | 15  | 0  | 0  | 0   | 4   | 0   | 0   | 0  | 0 | 0  | 2   | 0  | 0    | 59   | 0  | 0   | 0  | 0  | 0   | 0  | 4  | 0  | 11 |
| Palaeocystodinium indet.          | 0  | 4  | 0  | 56  | 0  | 0  | 0   | 0   | 0   | 4   | 4  | 0 | 0  | 9   | 0  | 131  | 62   | 0  | 0   | 4  | 0  | 0   | 7  | 15 | 0  | 11 |
| Palaeohystrichophora infusoroides | 0  | 5  | 0  | 88  | 0  | 0  | 0   | 19  | 0   | 0   | 10 | 0 | 0  | 0   | 0  | 214  | 647  | 19 | 0   | 10 | 15 | 0   | 10 | 10 | 0  | 0  |
| Palaeoperidinium cf. cretaceum    | 0  | 16 | 0  | 48  | 0  | 0  | 0   | 0   | 0   | 0   | 0  | 0 | 0  | 16  | 0  | 88   | 2091 | 0  | 0   | 0  | 0  | 0   | 96 | 0  | 0  | 0  |
| Palaeoperidinium pyrophorum       | 0  | 0  | 0  | 91  | 0  | 0  | 0   | 0   | 0   | 0   | 0  | 0 | 0  | 0   | 0  | 3854 | 30   | 0  | 0   | 0  | 30 | 0   | 0  | 0  | 0  | 0  |
| Paleotetradinium sillicornum      | 0  | 53 | 0  | 27  | 0  | 0  | 0   | 0   | 13  | 0   | 0  | 0 | 0  | 40  | 0  | 0    | 1872 | 0  | 0   | 0  | 27 | 0   | 27 | 27 | 0  | 0  |
| Palynodinium cf. grallator        | 0  | 29 | 29 | 0   | 0  | 0  | 0   | 59  | 0   | 0   | 0  | 0 | 15 | 0   | 0  | 264  | 2097 | 0  | 0   | 29 | 0  | 0   | 0  | 15 | 0  | 0  |
| Palynodinium grallator            | 0  | 23 | 0  | 91  | 0  | 0  | 0   | 23  | 0   | 0   | 0  | 0 | 0  | 0   | 0  | 228  | 1719 | 0  | 0   | 23 | 0  | 0   | 68 | 0  | 23 | 0  |
| Peridinioid sp.                   | 48 | 0  | 0  | 238 | 0  | 0  | 0   | 191 | 48  | 0   | 48 | 0 | 48 | 0   | 0  | 4221 | 0    | 0  | 0   | 0  | 0  | 143 | 0  | 0  | 0  | 0  |
| Phanerodinium sp.                 | 0  | 0  | 0  | 106 | 0  | 0  | 35  | 71  | 0   | 0   | 0  | 0 | 0  | 0   | 0  | 106  | 830  | 0  | 0   | 0  | 35 | 0   | 71 | 0  | 0  | 0  |
| Phelodinium magnificum            | 74 | 0  | 0  | 89  | 30 | 0  | 148 | 208 | 45  | 30  | 30 | 0 | 0  | 0   | 0  | 193  | 0    | 30 | 30  | 30 | 0  | 89  | 0  | 0  | 0  | 0  |
| Phelodinium tricuspis             | 29 | 0  | 0  | 58  | 0  | 29 | 0   | 58  | 0   | 0   | 58 | 0 | 0  | 87  | 0  | 58   | 73   | 0  | 0   | 0  | 0  | 0   | 0  | 29 | 0  | 0  |
| Phtanoperidinium sp.              | 61 | 0  | 0  | 243 | 61 | 0  | 30  | 0   | 137 | 212 | 0  | 0 | 30 | 0   | 0  | 228  | 0    | 30 | 0   | 61 | 0  | 0   | 0  | 0  | 0  | 0  |
| Pierceites pentagonia             | 0  | 0  | 0  | 169 | 28 | 0  | 28  | 113 | 28  | 28  | 56 | 0 | 0  | 296 | 56 | 0    | 240  | 0  | 113 | 0  | 28 | 0   | 0  | 0  | 0  | 0  |
| Pyxidiniopsis sp.                 | 30 | 0  | 0  | 0   | 41 | 0  | 41  | 41  | 30  | 0   | 0  | 0 | 20 | 152 | 0  | 0    | 41   | 0  | 20  | 0  | 0  | 20  | 0  | 30 | 0  | 0  |
| Renidinium gracile                | 33 | 0  | 0  | 0   | 65 | 0  | 0   | 33  | 0   | 0   | 33 | 0 | 0  | 0   | 0  | 0    | 0    | 0  | 65  | 0  | 33 | 0   | 0  | 33 | 0  | 0  |
| Riculacysta perforata             | 22 | 0  | 0  | 89  | 0  | 0  | 44  | 44  | 311 | 0   | 0  | 0 | 22 | 56  | 0  | 67   | 0    | 0  | 0   | 44 | 0  | 0   | 0  | 44 | 0  | 0  |
|                                   | 0  | 0  | 0  | 20  | 20 | 0  | 0   | 40  | 0   | 0   | 30 | 0 | 0  | 60  | 0  | 0    | 20   | 0  | 40  | 30 | 0  | 0   | 40 | 0  | 0  | 0  |
|                                   | 28 | 0  | 0  | 0   | 0  | 0  | 83  | 0   | 278 | 28  | 0  | 0 | 0  | 0   | 0  | 56   | 0    | 0  | 0   | 0  | 28 | 28  | 0  | 28 | 0  | 28 |

|                              |     |    |    |     |     |    |    |    |    |     |    |    |   |      |     |     |    |     |    |    |    |     |     |    |   |   |
|------------------------------|-----|----|----|-----|-----|----|----|----|----|-----|----|----|---|------|-----|-----|----|-----|----|----|----|-----|-----|----|---|---|
| Senegalinium bicavatatum     | 5   | 0  | 0  | 0   | 10  | 3  | 0  | 3  | 0  | 14  | 8  | 0  | 0 | 58   | 3   | 4   | 0  | 3   | 0  | 0  | 0  | 0   | 0   | 8  | 0 | 0 |
| Senegalinium? dilwynense     | 21  | 21 | 0  | 21  | 11  | 37 | 0  | 11 | 11 | 0   | 0  | 0  | 0 | 101  | 0   | 21  | 0  | 0   | 0  | 0  | 0  | 0   | 0   | 96 | 0 | 0 |
| Senegalinium microgranulatum | 0   | 0  | 0  | 0   | 99  | 28 | 0  | 64 | 0  | 71  | 50 | 0  | 0 | 461  | 28  | 28  | 0  | 0   | 0  | 0  | 0  | 0   | 0   | 57 | 0 | 0 |
| Senegalinium obscurum        | 8   | 0  | 0  | 0   | 32  | 12 | 0  | 12 | 0  | 24  | 0  | 0  | 0 | 91   | 139 | 0   | 0  | 4   | 0  | 0  | 0  | 0   | 0   | 48 | 0 | 0 |
| Senegalinium spp. Undiff.    | 10  | 0  | 0  | 0   | 19  | 19 | 0  | 10 | 0  | 10  | 10 | 0  | 0 | 115  | 0   | 119 | 0  | 0   | 0  | 0  | 10 | 0   | 134 | 0  | 0 |   |
| Senoniasphaera inornata      | 17  | 0  | 0  | 0   | 75  | 38 | 0  | 25 | 0  | 42  | 29 | 0  | 0 | 188  | 8   | 0   | 0  | 8   | 0  | 0  | 0  | 0   | 17  | 0  | 0 |   |
| Senoniasphaera cf. inornata  | 6   | 0  | 0  | 0   | 12  | 0  | 0  | 25 | 0  | 6   | 6  | 0  | 0 | 114  | 141 | 0   | 0  | 0   | 0  | 0  | 0  | 0   | 28  | 0  | 0 |   |
| Senoniasphaera protrusa      | 7   | 0  | 0  | 0   | 0   | 0  | 0  | 18 | 0  | 22  | 0  | 0  | 0 | 133  | 72  | 0   | 0  | 0   | 0  | 0  | 0  | 0   | 18  | 0  | 0 |   |
| Senoniasphaera rotundata     | 19  | 0  | 0  | 9   | 37  | 0  | 28 | 0  | 14 | 0   | 42 | 19 | 0 | 234  | 28  | 126 | 0  | 0   | 0  | 0  | 0  | 0   | 80  | 0  | 0 |   |
| small peridinioid sp. 1      | 7   | 7  | 0  | 5   | 0   | 0  | 0  | 5  | 2  | 7   | 0  | 7  | 0 | 76   | 16  | 1   | 0  | 0   | 0  | 0  | 0  | 0   | 5   | 0  | 0 |   |
| Spinidinium sp.              | 8   | 0  | 0  | 26  | 0   | 0  | 0  | 0  | 0  | 0   | 0  | 4  | 0 | 72   | 15  | 4   | 0  | 0   | 0  | 0  | 0  | 0   | 6   | 0  | 0 |   |
| Spinidinium densispinatum    | 4   | 0  | 0  | 15  | 0   | 0  | 0  | 11 | 0  | 11  | 7  | 0  | 0 | 129  | 15  | 0   | 0  | 2   | 0  | 0  | 0  | 0   | 9   | 6  | 0 |   |
| Spinerella cornuta           | 0   | 0  | 0  | 49  | 0   | 0  | 0  | 0  | 0  | 107 | 19 | 0  | 0 | 238  | 19  | 0   | 0  | 19  | 0  | 10 | 0  | 0   | 0   | 0  | 0 |   |
| Spiniferites ramosus cpx.    | 16  | 0  | 0  | 32  | 0   | 0  | 0  | 0  | 0  | 48  | 0  | 16 | 0 | 248  | 16  | 0   | 0  | 16  | 0  | 0  | 0  | 128 | 0   | 0  |   |   |
| Spiniferites sp.             | 30  | 0  | 0  | 30  | 0   | 0  | 0  | 0  | 0  | 30  | 0  | 0  | 0 | 274  | 0   | 0   | 0  | 30  | 0  | 30 | 0  | 30  | 0   | 0  | 0 |   |
| Spongodinium delitiense      | 80  | 0  | 0  | 0   | 0   | 0  | 0  | 0  | 0  | 27  | 0  | 0  | 0 | 468  | 0   | 0   | 0  | 0   | 0  | 13 | 0  | 27  | 0   | 0  |   |   |
| Surculosphaeridium sp.       | 147 | 0  | 0  | 0   | 0   | 0  | 0  | 0  | 0  | 29  | 0  | 0  | 0 | 895  | 0   | 0   | 0  | 0   | 0  | 59 | 0  | 29  | 0   | 0  |   |   |
| Tanyosphaeridium sp.         | 228 | 68 | 0  | 46  | 23  | 0  | 0  | 0  | 0  | 23  | 0  | 0  | 0 | 808  | 0   | 0   | 0  | 68  | 0  | 0  | 0  | 23  | 0   | 0  |   |   |
| Thalassiphora ?bononiensis   | 191 | 0  | 0  | 0   | 143 | 0  | 0  | 0  | 0  | 95  | 0  | 0  | 0 | 3315 | 0   | 0   | 0  | 95  | 0  | 0  | 0  | 143 | 48  | 0  |   |   |
| Thalassiphora patula         | 247 | 0  | 0  | 71  | 141 | 0  | 0  | 0  | 0  | 106 | 0  | 0  | 0 | 1360 | 0   | 0   | 0  | 141 | 0  | 0  | 0  | 353 | 0   | 0  |   |   |
| Trigonpyxidium sp.           | 30  | 0  | 0  | 0   | 208 | 0  | 0  | 0  | 0  | 0   | 0  | 0  | 0 | 1826 | 0   | 0   | 0  | 59  | 0  | 30 | 0  | 15  | 0   | 0  |   |   |
| Trithyrodinium evittii       | 233 | 87 | 58 | 0   | 0   | 0  | 0  | 0  | 0  | 87  | 0  | 0  | 0 | 1367 | 0   | 0   | 29 | 102 | 0  | 58 | 0  | 0   | 0   | 29 |   |   |
| ?Trithyrodinium sp.          | 121 | 0  | 0  | 0   | 182 | 0  | 0  | 0  | 0  | 91  | 46 | 0  | 0 | 1593 | 0   | 0   | 0  | 0   | 0  | 0  | 0  | 0   | 0   | 0  |   |   |
| Turbiosphaera filosa         | 169 | 56 | 56 | 0   | 113 | 0  | 0  | 0  | 0  | 28  | 28 | 0  | 0 | 1354 | 0   | 0   | 28 | 113 | 28 | 0  | 28 | 0   | 0   | 0  |   |   |
|                              | 163 | 0  | 0  | 0   | 81  | 0  | 0  | 0  | 0  | 20  | 20 | 0  | 0 | 1179 | 0   | 0   | 0  | 112 | 0  | 0  | 0  | 20  | 0   | 0  |   |   |
|                              | 33  | 0  | 0  | 131 | 131 | 0  | 0  | 33 | 0  | 65  | 33 | 0  | 0 | 784  | 0   | 0   | 0  | 196 | 33 | 0  | 0  | 311 | 0   | 33 |   |   |
|                              | 0   | 0  | 0  | 0   | 178 | 0  | 0  | 0  | 0  | 0   | 67 | 0  | 0 | 1233 | 0   | 0   | 0  | 22  | 0  | 0  | 0  | 211 | 0   | 0  |   |   |
|                              | 170 | 80 | 0  | 20  | 240 | 0  | 0  | 0  | 0  | 60  | 0  | 0  | 0 | 1019 | 20  | 0   | 0  | 20  | 0  | 0  | 0  | 120 | 0   | 0  |   |   |
|                              | 0   | 28 | 0  | 0   | 306 | 0  | 0  | 0  | 28 | 28  | 0  | 0  | 0 | 849  | 0   | 0   | 0  | 28  | 0  | 0  | 0  | 264 | 0   | 0  |   |   |

| Dinocyst indet | P-cyst indet | G-cyst indet | Total # Dinocysts | Total # P-cysts | MORPHOGROUP Areoligera group | MORPHOGROUP Hystrichosphaeridium group | MORPHOGROUP Spiniferites-Achomosphaera | MORPHOGROUP Palynodinium | MORPHOGROUP Fibrous cribroperidinioids | MORPHOGROUP peridinioids | MORPHOGROUP Other dinocysts |
|----------------|--------------|--------------|-------------------|-----------------|------------------------------|----------------------------------------|----------------------------------------|--------------------------|----------------------------------------|--------------------------|-----------------------------|
| 0              | 16           | 70           | 659               | 114             | 118                          | 33                                     | 88                                     | 119                      | 7                                      | 40                       | 254                         |
| 331            | 43           | 11           | 2335              | 272             | 869                          | 203                                    | 117                                    | 331                      | 43                                     | 96                       | 677                         |
| 0              | 78           | 213          | 3170              | 539             | 326                          | 440                                    | 553                                    | 567                      | 121                                    | 241                      | 922                         |
| 0              | 67           | 266          | 1817              | 274             | 190                          | 317                                    | 274                                    | 258                      | 36                                     | 83                       | 659                         |
| 239            | 29           | 129          | 2152              | 286             | 253                          | 348                                    | 153                                    | 425                      | 29                                     | 95                       | 849                         |
| 0              | 25           | 125          | 1905              | 326             | 163                          | 221                                    | 246                                    | 535                      | 54                                     | 138                      | 547                         |
| 0              | 3            | 74           | 1358              | 120             | 95                           | 148                                    | 298                                    | 317                      | 52                                     | 40                       | 409                         |
| 130            | 29           | 216          | 1644              | 79              | 256                          | 180                                    | 245                                    | 285                      | 29                                     | 29                       | 620                         |
| 159            | 47           | 108          | 2265              | 295             | 89                           | 215                                    | 318                                    | 599                      | 37                                     | 98                       | 908                         |
| 62             | 11           | 26           | 478               | 62              | 72                           | 54                                     | 115                                    | 16                       | 5                                      | 30                       | 188                         |
| 74             | 19           | 78           | 698               | 91              | 117                          | 79                                     | 110                                    | 59                       | 11                                     | 53                       | 269                         |
| 0              | 26           | 95           | 942               | 125             | 104                          | 48                                     | 168                                    | 192                      | 15                                     | 52                       | 362                         |
| 0              | 68           | 126          | 2218              | 394             | 68                           | 68                                     | 345                                    | 861                      | 136                                    | 199                      | 540                         |
| 152            | 184          | 48           | 3694              | 585             | 80                           | 32                                     | 296                                    | 2179                     | 80                                     | 144                      | 881                         |
| 0              | 76           | 183          | 5377              | 335             | 183                          | 46                                     | 305                                    | 3854                     | 274                                    | 168                      | 548                         |
| 0              | 80           | 267          | 5884              | 361             | 575                          | 80                                     | 535                                    | 1872                     | 1926                                   | 174                      | 722                         |
| 0              | 191          | 557          | 6526              | 557             | 557                          | 15                                     | 997                                    | 2361                     | 1217                                   | 323                      | 1056                        |
| 319            | 125          | 46           | 5272              | 706             | 353                          | 114                                    | 1196                                   | 1947                     | 194                                    | 467                      | 1002                        |
| 0              | 286          | 310          | 11304             | 1479            | 429                          | 358                                    | 3315                                   | 4221                     | 334                                    | 715                      | 1932                        |
| 547            | 371          | 35           | 8369              | 1766            | 1872                         | 424                                    | 1554                                   | 936                      | 671                                    | 971                      | 1942                        |
| 0              | 297          | 386          | 6011              | 1143            | 846                          | 252                                    | 1885                                   | 193                      | 252                                    | 609                      | 1974                        |
| 509            | 393          | 218          | 5977              | 1192            | 974                          | 247                                    | 1585                                   | 131                      | 364                                    | 553                      | 2123                        |
| 0              | 410          | 167          | 7070              | 1851            | 1760                         | 273                                    | 1851                                   | 228                      | 121                                    | 668                      | 2170                        |
| 240            | 423          | 85           | 6501              | 1805            | 705                          | 338                                    | 1551                                   | 240                      | 56                                     | 804                      | 2806                        |
| 0              | 163          | 142          | 4859              | 956             | 1139                         | 213                                    | 1301                                   | 41                       | 346                                    | 315                      | 1505                        |
| 539            | 180          | 245          | 7599              | 1438            | 2370                         | 605                                    | 981                                    | 0                        | 212                                    | 556                      | 2876                        |
| 0              | 200          | 78           | 5210              | 1633            | 755                          | 844                                    | 1322                                   | 67                       | 111                                    | 433                      | 1678                        |
| 360            | 300          | 110          | 5036              | 1829            | 560                          | 470                                    | 1209                                   | 20                       | 0                                      | 1169                     | 1609                        |
| 0              | 306          | 153          | 6930              | 1656            | 3395                         | 223                                    | 877                                    | 56                       | 209                                    | 584                      | 1586                        |

**SI Table S6 – Bass River benthic foraminiferal record**

| Average depth (ft) | Average depth (m) | Distance from K-Pg boundary (m) | Anomalinoidea acuta | Anomalinoidea midwayensis | Anomalinoidea sp | Anomalinoidea simplex | Anomalinoidea spp | Bolivinoidea draco draco | Bulimina arkadelphia | Bulimina kickapoensis | Praebulimina quadrata | Bulimina referata | Praebulimina carseyae | Cibicoides succedens | Cibicoides sp. | Cibicoides spp | Citharina spp | Clavulinoidea trilatara | Coryphostoma incrassata | Coryphostoma plaitum | Coryphostoma decurrens | Dentalina spp |
|--------------------|-------------------|---------------------------------|---------------------|---------------------------|------------------|-----------------------|-------------------|--------------------------|----------------------|-----------------------|-----------------------|-------------------|-----------------------|----------------------|----------------|----------------|---------------|-------------------------|-------------------------|----------------------|------------------------|---------------|
| 1260,825           | 384,3             | -0,18                           | 0,6                 | 19,8                      | 0,0              | 0,6                   | 0,0               | 0,0                      | 0,0                  | 0,0                   | 0,0                   | 0,3               | 1,5                   | 3,1                  | 0,0            | 0,0            | 0,0           | 10,8                    | 0,3                     | 9,6                  | 0,0                    | 0,3           |
| 1261,05            | 384,37            | -0,25                           | 0,7                 | 12,0                      | 0,0              | 0,0                   | 0,0               | 0,0                      | 0,0                  | 0,0                   | 0,0                   | 0,0               | 3,6                   | 1,1                  | 0,0            | 0,0            | 0,0           | 13,1                    | 0,0                     | 9,5                  | 0,0                    | 1,5           |
| 1261,275           | 384,44            | -0,32                           | 0,3                 | 14,6                      | 0,0              | 0,0                   | 0,0               | 0,0                      | 0,0                  | 0,0                   | 0,3                   | 0,0               | 7,0                   | 2,6                  | 0,0            | 0,0            | 0,0           | 8,6                     | 0,3                     | 9,6                  | 0,3                    | 1,7           |
| 1261,425           | 384,48            | -0,36                           | 0,8                 | 18,0                      | 0,8              | 0,0                   | 0,3               | 0,0                      | 0,0                  | 0,0                   | 0,0                   | 0,0               | 4,2                   | 2,8                  | 0,0            | 0,0            | 0,0           | 4,5                     | 0,0                     | 11,0                 | 0,0                    | 1,7           |
| 1261,625           | 384,54            | -0,42                           | 0,3                 | 23,4                      | 0,3              | 0,0                   | 0,0               | 0,0                      | 0,0                  | 0,0                   | 0,3                   | 0,0               | 3,4                   | 1,4                  | 0,0            | 0,0            | 0,0           | 4,7                     | 0,3                     | 12,5                 | 0,0                    | 0,3           |
| 1261,85            | 384,61            | -0,49                           | 0,0                 | 12,7                      | 0,3              | 0,0                   | 0,0               | 0,0                      | 0,5                  | 0,0                   | 0,8                   | 0,3               | 6,3                   | 3,3                  | 0,0            | 0,0            | 0,0           | 11,4                    | 0,3                     | 10,1                 | 0,0                    | 1,0           |
| 1262,075           | 384,68            | -0,56                           | 0,0                 | 10,8                      | 0,7              | 0,0                   | 0,0               | 0,0                      | 0,0                  | 0,0                   | 0,3                   | 0,0               | 4,5                   | 2,8                  | 0,0            | 0,0            | 0,0           | 22,0                    | 0,0                     | 5,9                  | 0,0                    | 1,0           |
| 1262,275           | 384,74            | -0,62                           | 0,0                 | 4,5                       | 0,3              | 0,0                   | 0,3               | 0,0                      | 0,0                  | 0,3                   | 0,3                   | 0,0               | 4,5                   | 2,2                  | 0,0            | 0,0            | 0,0           | 18,9                    | 0,0                     | 9,2                  | 0,0                    | 0,3           |
| 1262,525           | 384,82            | -0,7                            | 0,0                 | 5,4                       | 0,3              | 0,0                   | 0,0               | 0,0                      | 0,0                  | 0,0                   | 0,0                   | 0,0               | 3,1                   | 1,1                  | 0,0            | 0,0            | 0,0           | 16,4                    | 0,0                     | 7,6                  | 0,0                    | 0,6           |
| 1262,7             | 384,87            | -0,75                           | 0,0                 | 3,2                       | 1,2              | 0,0                   | 0,0               | 0,0                      | 0,0                  | 0,0                   | 0,0                   | 0,0               | 0,0                   | 3,2                  | 0,0            | 0,0            | 0,0           | 35,7                    | 0,0                     | 8,4                  | 0,0                    | 1,0           |
| 1262,925           | 384,94            | -0,82                           | 0,0                 | 6,8                       | 0,0              | 0,0                   | 0,0               | 0,0                      | 0,0                  | 0,0                   | 0,0                   | 0,0               | 2,6                   | 3,5                  | 0,0            | 0,0            | 0,0           | 13,8                    | 0,3                     | 10,0                 | 0,0                    | 1,2           |
| 1263,15            | 385,01            | -0,89                           | 0,0                 | 11,7                      | 0,0              | 0,0                   | 0,0               | 0,0                      | 0,0                  | 0,0                   | 0,3                   | 0,0               | 0,0                   | 3,4                  | 0,0            | 0,7            | 0,0           | 10,1                    | 0,3                     | 6,4                  | 0,0                    | 0,7           |
| 1263,425           | 385,09            | -0,97                           | 0,0                 | 4,2                       | 0,5              | 0,0                   | 0,0               | 0,0                      | 0,0                  | 0,2                   | 0,0                   | 0,0               | 3,4                   | 5,9                  | 0,0            | 0,0            | 0,0           | 8,6                     | 0,2                     | 5,2                  | 0,0                    | 0,7           |
| 1263,95            | 385,25            | -1,13                           | 0,3                 | 4,8                       | 1,6              | 0,0                   | 0,3               | 0,0                      | 0,0                  | 0,0                   | 0,0                   | 0,0               | 0,3                   | 6,2                  | 0,0            | 0,8            | 0,0           | 18,5                    | 0,0                     | 5,4                  | 0,0                    | 1,6           |
| 1264,375           | 385,38            | -1,26                           | 0,0                 | 8,7                       | 5,1              | 0,0                   | 0,0               | 0,0                      | 0,0                  | 0,0                   | 0,0                   | 0,0               | 0,0                   | 3,8                  | 0,0            | 0,0            | 0,0           | 19,2                    | 0,3                     | 1,9                  | 0,0                    | 1,9           |
| 1264,9             | 385,54            | -1,42                           | 0,0                 | 5,6                       | 4,1              | 0,0                   | 0,0               | 0,0                      | 0,0                  | 0,0                   | 0,4                   | 0,0               | 0,0                   | 4,9                  | 0,0            | 0,0            | 0,0           | 20,6                    | 0,0                     | 4,1                  | 0,0                    | 1,5           |
| 1266,425           | 386,01            | -1,89                           | 0,0                 | 7,7                       | 1,9              | 0,0                   | 0,0               | 0,4                      | 0,0                  | 0,0                   | 0,0                   | 0,0               | 2,4                   | 9,0                  | 0,0            | 0,0            | 0,0           | 10,5                    | 1,1                     | 4,5                  | 0,2                    | 2,4           |
| 1266,925           | 386,16            | -2,04                           | 0,0                 | 12,1                      | 0,7              | 0,0                   | 0,0               | 0,0                      | 0,7                  | 0,0                   | 0,7                   | 0,0               | 0,0                   | 5,6                  | 0,0            | 0,0            | 0,0           | 7,2                     | 6,9                     | 4,9                  | 0,0                    | 1,6           |
| 1267,4             | 386,31            | -2,19                           | 0,0                 | 20,6                      | 0,0              | 0,0                   | 0,0               | 0,0                      | 0,7                  | 0,3                   | 0,7                   | 0,3               | 1,4                   | 3,8                  | 1,0            | 0,3            | 0,0           | 10,3                    | 7,2                     | 3,8                  | 0,0                    | 1,4           |
| 1267,925           | 386,46            | -2,34                           | 0,0                 | 10,9                      | 0,0              | 0,0                   | 0,0               | 0,0                      | 3,3                  | 0,0                   | 0,7                   | 0,0               | 2,0                   | 5,3                  | 3,6            | 0,0            | 0,0           | 6,9                     | 4,6                     | 3,6                  | 0,0                    | 2,0           |
| 1268,425           | 386,62            | -2,5                            | 0,0                 | 6,7                       | 0,3              | 0,6                   | 0,0               | 0,0                      | 1,5                  | 0,0                   | 0,0                   | 0,0               | 4,1                   | 13,1                 | 0,0            | 0,3            | 0,0           | 6,7                     | 1,7                     | 5,0                  | 0,0                    | 1,5           |
| 1268,925           | 386,77            | -2,65                           | 0,0                 | 6,8                       | 0,7              | 1,1                   | 0,0               | 0,0                      | 7,1                  | 0,0                   | 0,0                   | 0,0               | 8,5                   | 7,1                  | 1,1            | 0,0            | 0,0           | 7,1                     | 1,8                     | 2,1                  | 0,0                    | 0,4           |
| 1269,425           | 386,92            | -2,8                            | 0,0                 | 10,4                      | 0,0              | 0,6                   | 0,0               | 0,0                      | 3,8                  | 0,0                   | 0,0                   | 0,0               | 11,7                  | 5,4                  | 1,3            | 0,0            | 0,0           | 6,6                     | 1,6                     | 4,1                  | 0,0                    | 1,3           |
| 1269,925           | 387,07            | -2,95                           | 0,0                 | 10,0                      | 0,4              | 0,7                   | 0,4               | 0,4                      | 4,3                  | 0,0                   | 0,0                   | 0,0               | 9,3                   | 8,6                  | 0,0            | 0,4            | 0,0           | 4,3                     | 1,1                     | 3,2                  | 0,0                    | 0,7           |
| 1270,425           | 387,23            | -3,11                           | 0,0                 | 8,5                       | 0,0              | 0,0                   | 0,4               | 0,0                      | 1,5                  | 0,7                   | 0,0                   | 0,0               | 12,5                  | 4,4                  | 0,0            | 0,0            | 0,0           | 5,1                     | 0,7                     | 7,0                  | 0,0                    | 1,8           |
| 1270,925           | 387,38            | -3,26                           | 0,0                 | 10,5                      | 0,0              | 0,8                   | 0,0               | 0,0                      | 1,6                  | 0,0                   | 0,0                   | 0,0               | 13,0                  | 4,3                  | 0,0            | 0,0            | 0,0           | 4,9                     | 0,3                     | 7,3                  | 0,0                    | 0,5           |
| 1271,425           | 387,53            | -3,41                           | 0,0                 | 5,8                       | 0,0              | 0,3                   | 0,3               | 0,0                      | 0,0                  | 0,3                   | 0,0                   | 0,3               | 20,9                  | 8,0                  | 0,0            | 0,3            | 0,0           | 2,8                     | 0,6                     | 6,7                  | 0,0                    | 0,6           |
| 1271,875           | 387,67            | -3,55                           | 0,0                 | 6,0                       | 0,0              | 0,0                   | 0,4               | 0,0                      | 0,0                  | 0,4                   | 0,0                   | 0,0               | 13,7                  | 5,3                  | 0,0            | 0,0            | 0,0           | 3,2                     | 0,7                     | 11,6                 | 0,0                    | 1,1           |
| 1272,275           | 387,79            | -3,67                           | 0,0                 | 11,5                      | 0,4              | 0,0                   | 0,0               | 0,0                      | 0,0                  | 0,0                   | 0,7                   | 0,0               | 12,9                  | 6,8                  | 0,0            | 0,4            | 0,0           | 1,1                     | 0,0                     | 11,5                 | 0,0                    | 0,7           |
| 1272,425           | 387,83            | -3,71                           | 0,0                 | 12,6                      | 0,0              | 0,0                   | 0,0               | 0,0                      | 0,0                  | 0,0                   | 0,9                   | 0,0               | 14,5                  | 6,3                  | 0,0            | 0,0            | 0,0           | 1,3                     | 0,9                     | 9,5                  | 0,0                    | 0,9           |
| 1272,95            | 388               | -3,88                           | 0,0                 | 8,6                       | 0,3              | 0,5                   | 0,3               | 0,0                      | 0,0                  | 0,0                   | 0,5                   | 0,0               | 14,1                  | 11,8                 | 0,0            | 0,0            | 0,3           | 0,5                     | 0,5                     | 7,8                  | 0,0                    | 1,3           |



| Ramulina spp | Siphogenerinoides elegans | Siphogenerinoides plummerae | Spiroplectinella spp | Stilostomella spp | Tappanina selimensis | Vaginulina spp | Verneuilina monmouthensis | Indet. | Sum   | Bi- triserials | Agglut | Infaunal | Berger-Parker | Nr taxa |
|--------------|---------------------------|-----------------------------|----------------------|-------------------|----------------------|----------------|---------------------------|--------|-------|----------------|--------|----------|---------------|---------|
| 0,0          | 0,0                       | 0,0                         | 0,0                  | 0,0               | 0,0                  | 0,6            | 0,0                       | 13,6   | 100,0 | 12,4           | 13,3   | 35,9     | 19,81424149   | 23      |
| 0,4          | 0,0                       | 0,0                         | 0,0                  | 0,4               | 0,0                  | 0,7            | 0,0                       | 8,8    | 100,0 | 15,0           | 16,1   | 46,0     | 15,32846715   | 19      |
| 0,3          | 0,3                       | 0,0                         | 0,0                  | 0,0               | 0,0                  | 0,7            | 0,0                       | 7,6    | 100,0 | 18,9           | 13,6   | 45,0     | 15,89403974   | 24      |
| 0,0          | 0,0                       | 0,3                         | 0,0                  | 0,6               | 0,0                  | 1,1            | 0,0                       | 5,6    | 100,0 | 16,6           | 11,3   | 37,7     | 18,02816901   | 22      |
| 0,3          | 0,0                       | 0,0                         | 0,0                  | 0,3               | 0,0                  | 1,4            | 0,0                       | 8,1    | 100,0 | 18,3           | 8,5    | 39,3     | 23,38983051   | 25      |
| 0,8          | 0,3                       | 0,3                         | 0,0                  | 0,3               | 0,3                  | 1,0            | 0,0                       | 5,6    | 100,0 | 19,7           | 19,7   | 51,9     | 12,65822785   | 29      |
| 0,0          | 0,0                       | 0,7                         | 0,0                  | 0,0               | 0,0                  | 1,0            | 0,0                       | 8,4    | 100,0 | 13,2           | 28,9   | 54,0     | 21,95121951   | 22      |
| 1,1          | 0,3                       | 0,3                         | 0,0                  | 0,0               | 0,0                  | 0,6            | 0,0                       | 10,0   | 100,0 | 14,8           | 25,1   | 47,6     | 18,94150418   | 24      |
| 0,0          | 0,0                       | 0,0                         | 0,0                  | 0,6               | 0,0                  | 1,4            | 0,0                       | 4,2    | 100,0 | 12,2           | 19,3   | 45,6     | 20,67988669   | 22      |
| 0,2          | 0,0                       | 0,2                         | 0,0                  | 0,2               | 0,0                  | 1,2            | 0,0                       | 10,7   | 100,0 | 8,4            | 38,2   | 58,3     | 35,73200993   | 19      |
| 0,0          | 0,3                       | 0,0                         | 0,0                  | 0,0               | 0,0                  | 0,0            | 0,0                       | 7,6    | 100,0 | 13,5           | 17,4   | 41,8     | 22,94117647   | 24      |
| 0,0          | 0,0                       | 0,7                         | 0,0                  | 0,0               | 0,0                  | 0,7            | 0,0                       | 19,1   | 100,0 | 8,1            | 12,1   | 29,9     | 21,47651007   | 25      |
| 0,2          | 0,0                       | 0,5                         | 0,0                  | 0,5               | 0,0                  | 0,7            | 0,0                       | 5,7    | 100,0 | 9,6            | 20,4   | 42,8     | 21,86732187   | 23      |
| 0,3          | 0,0                       | 0,8                         | 0,0                  | 0,0               | 0,0                  | 0,3            | 0,0                       | 9,4    | 100,0 | 5,6            | 25,0   | 42,5     | 21,77419355   | 24      |
| 0,0          | 0,0                       | 0,6                         | 0,0                  | 0,0               | 0,0                  | 1,0            | 0,3                       | 9,6    | 100,0 | 2,9            | 28,8   | 45,5     | 19,23076923   | 23      |
| 0,4          | 0,0                       | 0,0                         | 0,0                  | 0,7               | 0,0                  | 0,4            | 0,0                       | 5,2    | 100,0 | 4,9            | 30,3   | 51,3     | 20,59925094   | 22      |
| 0,0          | 0,0                       | 0,0                         | 0,0                  | 0,0               | 0,0                  | 1,1            | 0,0                       | 3,6    | 100,0 | 12,8           | 25,2   | 54,3     | 11,32478632   | 27      |
| 0,0          | 0,0                       | 0,3                         | 0,3                  | 0,0               | 0,0                  | 0,0            | 0,0                       | 4,9    | 100,0 | 16,3           | 24,2   | 58,8     | 12,09150327   | 26      |
| 0,0          | 0,0                       | 0,0                         | 0,0                  | 0,0               | 0,0                  | 0,0            | 0,0                       | 4,1    | 100,0 | 14,4           | 22,7   | 50,2     | 20,61855567   | 28      |
| 0,3          | 0,0                       | 0,0                         | 0,0                  | 0,3               | 0,0                  | 0,0            | 0,0                       | 4,3    | 100,0 | 16,4           | 17,1   | 46,1     | 11,18421053   | 27      |
| 0,0          | 0,0                       | 0,0                         | 0,0                  | 0,0               | 0,0                  | 0,3            | 0,0                       | 8,7    | 100,0 | 15,2           | 23,3   | 47,2     | 16,03498542   | 28      |
| 0,0          | 0,0                       | 0,4                         | 0,0                  | 0,4               | 0,0                  | 0,0            | 0,7                       | 7,1    | 100,0 | 24,2           | 17,4   | 55,2     | 15,3024911    | 25      |
| 1,3          | 0,0                       | 0,0                         | 0,0                  | 0,0               | 0,0                  | 0,0            | 0,0                       | 3,5    | 100,0 | 25,0           | 22,8   | 58,5     | 15,82278481   | 27      |
| 0,0          | 0,0                       | 0,0                         | 0,4                  | 0,0               | 0,0                  | 0,0            | 1,8                       | 4,7    | 100,0 | 24,4           | 21,1   | 55,2     | 14,33691756   | 28      |
| 0,0          | 0,0                       | 0,0                         | 0,7                  | 0,0               | 0,0                  | 0,0            | 0,0                       | 9,2    | 100,0 | 27,9           | 22,1   | 58,5     | 16,17647059   | 24      |
| 0,0          | 0,0                       | 0,0                         | 0,0                  | 0,0               | 0,0                  | 0,0            | 3,0                       | 8,6    | 100,0 | 27,8           | 16,8   | 52,2     | 12,97297297   | 25      |
| 0,0          | 0,0                       | 0,3                         | 0,3                  | 0,0               | 0,0                  | 0,0            | 0,6                       | 4,9    | 100,0 | 31,0           | 19,0   | 57,7     | 20,85889571   | 28      |
| 0,0          | 0,0                       | 0,0                         | 0,4                  | 0,0               | 0,0                  | 0,0            | 0,7                       | 5,3    | 100,0 | 27,7           | 19,6   | 54,7     | 14,73684211   | 25      |
| 0,0          | 0,0                       | 0,0                         | 0,0                  | 0,4               | 0,0                  | 0,7            | 1,8                       | 3,6    | 100,0 | 26,5           | 16,5   | 52,7     | 13,26164875   | 25      |
| 0,3          | 0,0                       | 0,0                         | 0,0                  | 0,0               | 0,0                  | 0,0            | 1,6                       | 2,2    | 100,0 | 28,1           | 18,6   | 56,8     | 15,77287066   | 23      |
| 0,5          | 0,0                       | 0,0                         | 0,5                  | 0,3               | 0,0                  | 0,5            | 1,0                       | 7,1    | 100,0 | 23,7           | 16,9   | 51,6     | 14,35768262   | 29      |
